# Supplementary material for: HEx: A heterologous expression platform for the discovery of fungal natural products
Source: PubMed Central journal article supplement — Sci Adv. 2018 Apr 11;4(4):eaar5459. doi: 10.1126/sciadv.aar5459 (PMC5895447; doi:10.1126/sciadv.aar5459), 2018-04-11
Supplement: aar5459_SM.pdf [file aar5459_SM.pdf]

## Supplementary Materials for

### **HEx: A heterologous expression platform for the discovery of fungal natural products**

Colin J. B. Harvey, Mancheng Tang, Ulrich Schlecht, Joe Horecka, Curt R. Fischer, Hsiao-Ching Lin, Jian Li, Brian Naughton, James Cherry, Molly Miranda, Yong Fuga Li, Angela M. Chu, James R. Hennessy, Gergana A. Vandova, Diane Inglis, Raeka S. Aiyar, Lars M. Steinmetz, Ronald W. Davis, Marnix H. Medema, Elizabeth Sattely, Chaitan Khosla, Robert P. St. Onge, Yi Tang, Maureen E. Hillenmeyer

Published 11 April 2018, *Sci. Adv.* **4**, eaar5459 (2018)

DOI: 10.1126/sciadv.aar5459

#### **The PDF file includes:**

- Supplementary Text
- fig. S1. Characterization of *S. cerevisiae* P<sub>ADH2</sub>-like promoters.
- fig. S2. Cloning vectors used in this study.
- fig. S3. Improving DNA assembly.
- fig. S4. Schematics of all PKS-containing BGCs examined here.
- fig. S5. UTC-containing BGCs examined here.
- fig. S6. Volcano plot of all spectral features identified in the automated analysis of strains expressing PKS-containing BGCs.
- fig. S8. All features produced by PKS1 in strain 132.
- fig. S9. All features produced by PKS2 in strain 133.
- fig. S10. All features produced by PKS4 in strain 255.
- fig. S11. All features produced by PKS6 in strain 178.
- fig. S12. All features produced by PKS8 in strain 164.
- fig. S13. All features produced by PKS10 in strain 246.
- fig. S14. All features produced by PKS13 in strain 206.
- fig. S15. All features produced by PKS14 in strain 257.
- fig. S16. All features produced by PKS15 in strain 247.
- fig. S17. All features produced by PKS16 in strain 177.
- fig. S18. All features produced by PKS17 in strain 176.
- fig. S19. All features produced by PKS18 in strain 207.
- fig. S20. All features produced by PKS20 in strain 208.

- fig. S21. All features produced by PKS22 in strain 209.
- fig. S22. All features produced by PKS23 in strain 241.
- fig. S23. All features produced by PKS24 in strain 210.
- fig. S24. All features produced by PKS28 in strain 240.
- fig. S25.  $^1\text{H}$  NMR spectrum of compound **6** in  $\text{CDCl}_3$ .
- fig. S26.  $^{13}\text{C}$  NMR spectrum of compound **6** in  $\text{CDCl}_3$ .
- fig. S27.  $^1\text{H}$ - $^1\text{H}$  COSY spectrum of compound **6** in  $\text{CDCl}_3$ .
- fig. S28. HSQC spectrum of compound **6** in  $\text{CDCl}_3$ .
- fig. S29. HMBC spectrum of compound **6** in  $\text{CDCl}_3$ .
- fig. S30.  $^1\text{H}$  NMR spectrum of compound **7** in acetone- $\text{d}_6$ .
- fig. S31.  $^{13}\text{C}$  NMR spectrum of compound **7** in acetone- $\text{d}_6$ .
- fig. S32.  $^1\text{H}$ - $^1\text{H}$  COSY spectrum of compound **7** in acetone- $\text{d}_6$ .
- fig. S33. HSQC spectrum of compound **7** in acetone- $\text{d}_6$ .
- fig. S34. HMBC spectrum of compound **7** in acetone- $\text{d}_6$ .
- fig. S35.  $^1\text{H}$  NMR spectrum of compound **8** in acetone- $\text{d}_6$ .
- fig. S36.  $^{13}\text{C}$  NMR spectrum of compound **8** in acetone- $\text{d}_6$ .
- fig. S37.  $^1\text{H}$ - $^1\text{H}$  COSY spectrum of compound **8** in acetone- $\text{d}_6$ .
- fig. S38. HSQC spectrum of compound **8** in acetone- $\text{d}_6$ .
- fig. S39. HMBC spectrum of compound **8** in acetone- $\text{d}_6$ .
- fig. S40.  $^1\text{H}$  NMR spectrum of compound **9** in  $\text{CDCl}_3$ .
- fig. S41.  $^{13}\text{C}$  NMR spectrum of compound **9** in  $\text{CDCl}_3$ .
- fig. S42.  $^1\text{H}$ - $^1\text{H}$  COSY spectrum of compound **9** in  $\text{CDCl}_3$ .
- fig. S43. HSQC spectrum of compound **9** in  $\text{CDCl}_3$ .
- fig. S44. HMBC spectrum of compound **9** in  $\text{CDCl}_3$ .
- fig. S45.  $^1\text{H}$  NMR spectrum of compound **10** in  $\text{CDCl}_3$ .
- fig. S46.  $^{13}\text{C}$  NMR spectrum of compound **10** in  $\text{CDCl}_3$ .
- fig. S47.  $^1\text{H}$ - $^1\text{H}$  COSY spectrum of compound **10** in  $\text{CDCl}_3$ .
- fig. S48. HSQC spectrum of compound **10** in  $\text{CDCl}_3$ .
- fig. S49. HMBC spectrum of compound **10** in  $\text{CDCl}_3$ .
- fig. S50.  $^1\text{H}$  NMR spectrum of compound **11** in  $\text{CDCl}_3$ .
- fig. S51.  $^{13}\text{C}$  NMR spectrum of compound **11** in  $\text{CDCl}_3$ .
- fig. S52.  $^1\text{H}$  NMR spectrum of compound **12** in  $\text{CDCl}_3$ .
- fig. S53.  $^{13}\text{C}$  NMR spectrum of compound **12** in  $\text{CDCl}_3$ .
- fig. S54.  $^1\text{H}$ - $^1\text{H}$  COSY spectrum of compound **12** in  $\text{CDCl}_3$ .
- fig. S55. HSQC spectrum of compound **12** in  $\text{CDCl}_3$ .
- fig. S56. HMBC spectrum of compound **12** in  $\text{CDCl}_3$ .
- fig. S57. NOESY spectrum of compound **12** in  $\text{CDCl}_3$ .
- fig. S58.  $^1\text{H}$  NMR spectrum of compound **13** in  $\text{CDCl}_3$ .
- fig. S59.  $^{13}\text{C}$  NMR spectrum of compound **13** in  $\text{CDCl}_3$ .
- fig. S60.  $^1\text{H}$ - $^1\text{H}$  COSY spectrum of compound **13** in  $\text{CDCl}_3$ .
- fig. S61. HSQC spectrum of compound **13** in  $\text{CDCl}_3$ .
- fig. S62. HMBC spectrum of compound **13** in  $\text{CDCl}_3$ .
- fig. S63. NOESY spectrum of compound **13** in  $\text{CDCl}_3$ .
- fig. S64.  $^1\text{H}$  NMR spectrum of compound **14** in  $\text{CDCl}_3$ .

- fig. S65.  $^{13}\text{C}$  NMR spectrum of compound **14** in  $\text{CDCl}_3$ .
- fig. S66.  $^1\text{H}$ - $^1\text{H}$  COSY spectrum of compound **14** in  $\text{CDCl}_3$ .
- fig. S67. HSQC spectrum of compound **14** in  $\text{CDCl}_3$ .
- fig. S68. HMBC spectrum of compound **14** in  $\text{CDCl}_3$ .
- fig. S69.  $^1\text{H}$  NMR spectrum of compound **15** in  $\text{CDCl}_3$ .
- fig. S70.  $^{13}\text{C}$  NMR spectrum of compound **15** in  $\text{CDCl}_3$ .
- fig. S71.  $^1\text{H}$ - $^1\text{H}$  COSY spectrum of compound **15** in  $\text{CDCl}_3$ .
- fig. S72. HSQC spectrum of compound **15** in  $\text{CDCl}_3$ .
- fig. S73. HMBC spectrum of compound **15** in  $\text{CDCl}_3$ .
- fig. S74. HMBC spectrum of compound **15** in  $\text{CDCl}_3$ .
- fig. S75.  $^1\text{H}$  NMR spectrum of compound **16** in  $\text{CDCl}_3$ .
- fig. S76.  $^{13}\text{C}$  NMR spectrum of compound **16** in  $\text{CDCl}_3$ .
- fig. S77.  $^1\text{H}$ - $^1\text{H}$  COSY spectrum of compound **16** in  $\text{CDCl}_3$ .
- fig. S78. HSQC spectrum of compound **16** in  $\text{CDCl}_3$ .
- fig. S79. HMBC spectrum of compound **16** in  $\text{CDCl}_3$ .
- table S1. Ion source parameters used in this study.
- table S2. Expression data for selected promoters drawn from genome-wide expression studies.
- table S3. Sequences of HEx promoters.
- table S4. Background strains used throughout this study.
- table S5. Features integrated for the determination of sesquiterpenoid titer in Fig. 2B.
- table S6. Order of promoters and terminators used in the expression of all cryptic fungal BGCs examined in this study.
- table S7. Standard part plasmids and expression vectors used for the assembly of cryptic BGCS in this study.
- table S8. Coordinates of native loci from which all clusters examined here were derived along with the IDs of plasmids expressing the engineered cluster versions.
- table S9. Abbreviations for the functional gene annotations used in Figs. 2, 5, and 6.
- table S10. Strains expressing cryptic fungal BGCs analyzed here.
- table S11. NMR data of compound **6**.
- table S12. NMR data of compound **7**.
- table S13. NMR data of compound **8**.
- table S14. NMR data of compound **9**.
- table S15. NMR data of compound **10**.
- table S16. NMR data of compound **11**.
- table S17. NMR data of compound **12**.
- table S18. NMR data of compound **13**.
- table S19. NMR data of compound **14**.
- table S20. NMR data of compound **15**.
- table S21. NMR data of compound **16**.
- References (70–73)

**Other Supplementary Material for this manuscript includes the following:**  
(available at [advances.sciencemag.org/cgi/content/full/4/4/eaar5459/DC1](https://advances.sciencemag.org/cgi/content/full/4/4/eaar5459/DC1))

- fig. S7 (.pdf format).
- Data file S1 (.gb format).



## Supplementary Text

### **Selection and characterization of P<sub>ADH2</sub>-like promoters:**

Prior to this study, the only promoter set with of sufficient size as to be compatible with the assembly of large, multigene plasmids consisted entirely of strong constitutive promoters(36, 37). In contrast to this large panel, controllable promoter sets based on natural sequences modulated by copper (27), methionine(28), galactose(29), or other carbon sources(30) are limited to 4 or fewer mutually controllable promoters, while synthetic promoters and those employing engineered transcription factor binding sites require stretches of homologous sequence likely to complicate single-step assembly efforts(70, 71). As described in the main text, we sought to identify and characterize a large set of promoters of genes coregulated with ADH2.

Expression values for *Saccharomyces cerevisiae* cultures grown in both YPD (fermentation) and YPE (respiration) were used for the selection of P<sub>ADH2</sub>-like promoters. The values for selected promoters, which had an expression value <2 in YPD and >4.5 in YPE as well as the known constitutive promoters used as controls are listed in table S2. The full dataset used for this analysis is available from the authors of the original study at:

<http://steinmetzlab.embl.de/NFRsharing/index.html>.

The fluorescence profiles for GFP expressed under strong *S. cerevisiae* P<sub>ADH2</sub>-like sequences and all *sensu stricto* ADH2 promoters are illustrated in Fig. 2A of the main text. Shown in fig. S1a is the expression of GFP over time when driven by all *S. cerevisiae* promoters examined here. Figure S1b shows representative fluorescence intensity histograms from flow cytometry experiments and while fig. S1c shows both light field and fluorescence microscopy images with these same strains.

P<sub>ADH2</sub>-like promoters from *sensu stricto* *Saccharomyces* species were chosen by selecting 500 bases upstream of the start codon of the closest homologue of *S. cerevisiae* ADH2 in each genome. Figure S1d shows a phylogenetic tree for the all of the *sensu stricto* P<sub>ADH2</sub> sequences along with a multiple sequence alignment of the upstream activating sequences shown in fig. S1e and the pairwise identities of all *sensu stricto* P<sub>ADH2</sub> sequences are illustrated in fig. S1f. The sequences of all promoters examined in this study are listed in table S4.

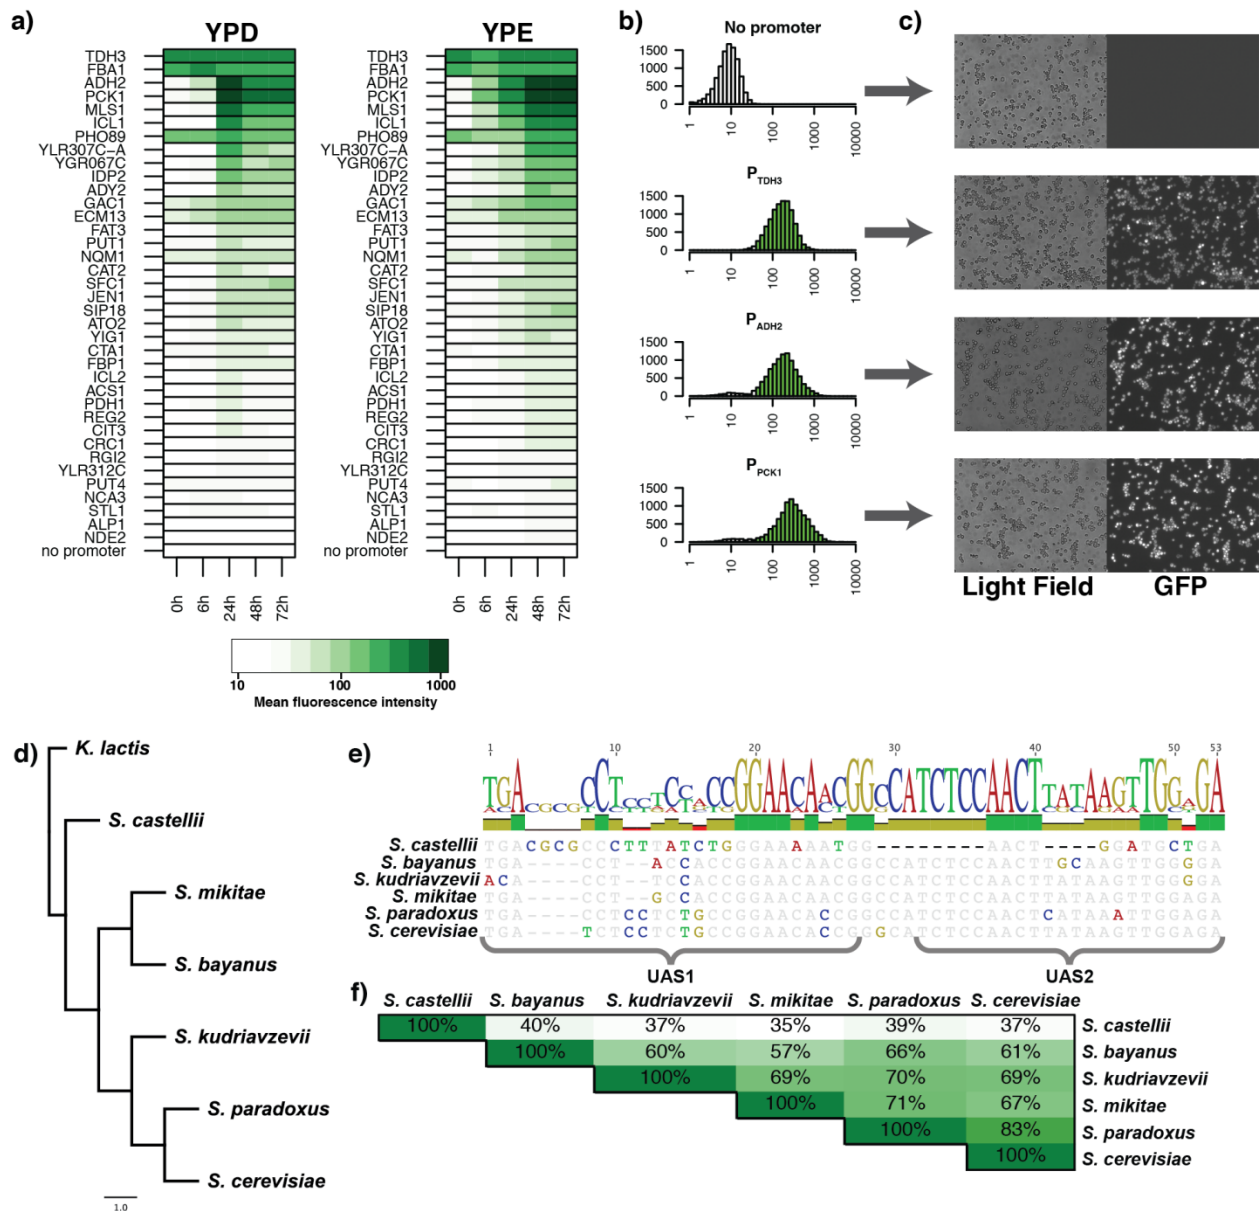

**fig. S1. Characterization of *S. cerevisiae* P<sub>ADH2</sub>-like promoters.** (a) Expression of eGFP under all *S. cerevisiae* promoters examined here. Fluorescence intensity calculated as the mean of 10<sup>4</sup> cells. (b) Histograms from representative flow cytometry experiments. All histograms represent 10<sup>4</sup> cells after 48 h of culture in YPD medium. (c) Light field and fluorescence images taken of eGFP expressing strains 48 h of culture in YPD medium. (d) Cladogram of all *Saccharomyces* P<sub>ADH2</sub> sequences. (e) Multiple sequence alignment of previously characterized upstream activating sequences. (f) Pairwise identities of all *Saccharomyces* P<sub>ADH2</sub> sequences.

### Cloning vectors used in this study:

In addition to the HEx promoters, we also generated and characterized a novel series of vectors based on the pRS42X series of plasmids (72). These vectors all contain a 2 $\mu$  origins of replication and, as such, exist at high copy numbers within cells. While we believe this is an

appropriate context in which to initially examine each BGC, we wanted the ability to easily generate a stable, single copy, genomic integrant for each BGC. In order to facilitate this, we developed the system outline in fig. S2. We established a new set of vectors with the multiple cloning site (MCS) flanked by  $P_{ADH2}$  and  $T_{CYC1}$ . This expression cassette is then flanked by both a 200 bp linker sequence an I-SceI site on each side. These 18 bp nuclease recognition sites are unlikely to occur in any of the cryptic BGCs we wish to express and, as such, allow excision of the entire multigene cassette inserted at the MCS as a single fragment with no requirement for PCR. Linker sequences can then be used to target the multi-gene cassette for integration at any desired genomic locus. When present on the backbone, selectable markers have been moved inside the linker sequences, allowing for selection for correct integrants by plating on the appropriate SDC dropout media.

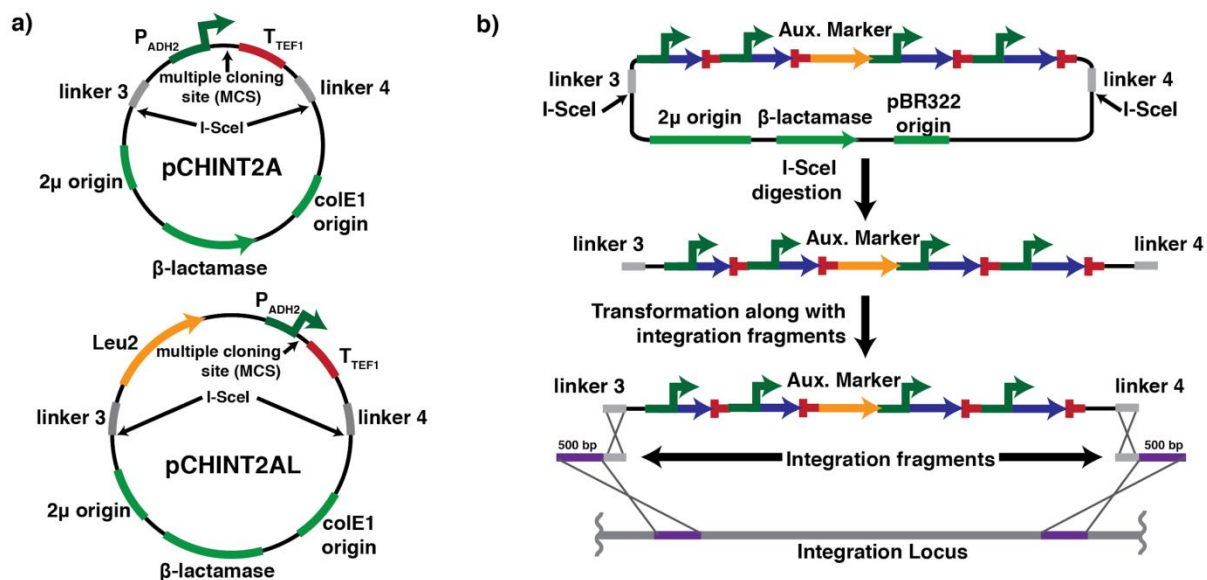

**fig. S2. Cloning vectors used in this study.** (a) Schematics of two representative pCHINT2A and pCHINT2AL, two representative cloning vectors used in this study for the assembly of plasmids with 1-2 genes (pCHINT2AL) or >3 genes (pCHINT2A). Fully annotated sequences for each of these vectors are provided in the Supporting Documents (b) Strategy for the excision and PCR-free integration of entire multigene cassettes at a desired genomic locus.

### High-throughput DNA assembly:

To increase the efficiency of assemblies by YHR, we tested the relative efficiencies of BY4743 and BY4743 $\Delta$ DNL4; a strain in which the *DNL4* ligase, involved in non-homologous endjoining, has been deleted. Figure S3a illustrates efficiencies of several plasmid assemblies done in both strains, demonstrating the deletion of the *DNL4* DNA ligase does consistently lead to more efficient assembly.

The sequencing of plasmid DNA directly out of yeast is one of the major advantages of the HEX pipeline. In establishing this portion of the pipeline we tested multiple means of preparation for both the plasmid DNA and the next-generation sequencing (NGS) library prep. Shown in fig. S3b is a comparison of sequencing efficiency using DNA prepared both from colonies picked

from plates and cell pellets collected from 1 ml of liquid culture. All samples were prepared using Zymo-prep-96 plasmid miniprep (Zymo research, S2007) according to manufacturer's specifications. These data show that these two DNA preparations generate samples of equivalent purity.

Initially, the HEx platform utilized an NGS library preparation in which the purified, exonuclease treated plasmid DNA was ultrasonically sheared, followed by end repair, A-tailing, and adaptor ligation. In order to decrease labor and increase throughput, we transitioned to a recently published modification of the Illumina Nextera transposase based preparation (66) as described in the Methods. Ultrasonic shearing necessitated the serial processing of multiple plates of clones while tagmentation allows for parallel processing of multiple plates. Figure S3c demonstrates that this modified Nextera preparation provides equivalent efficiency as compared to the standard approach.

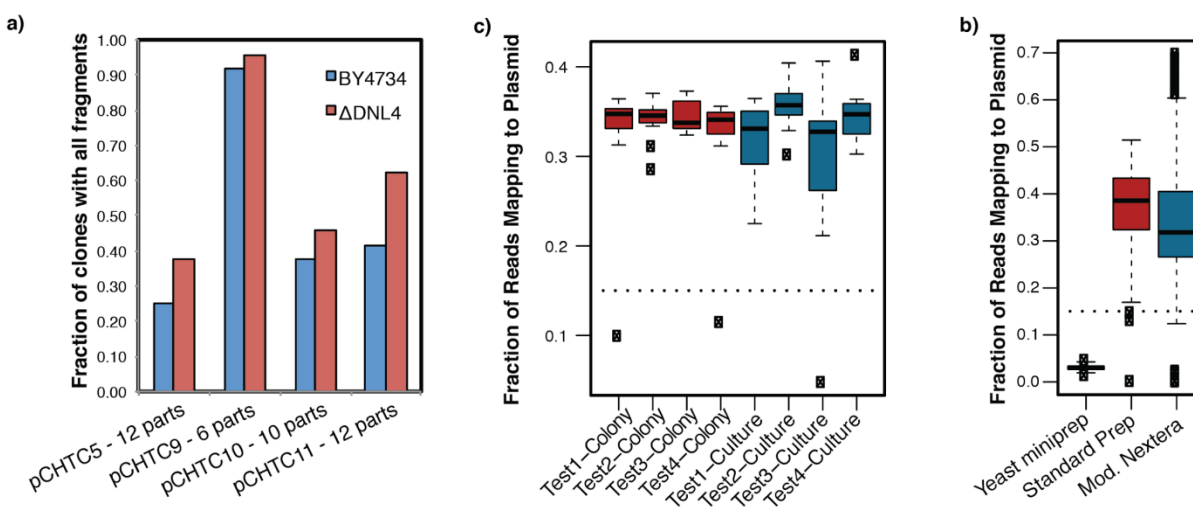

**fig. S3. Improving DNA assembly.** (a) Efficiency of assembly of 4 plasmids in both BY4743 and BY4743ΔDNL4. (b) Sequencing efficiency for DNA directly from picked colonies and cell pellets from 1 ml of 48 h culture for 4 separate assemblies. (c) Sequencing efficiency for libraries prepared by both ultrasonic shearing followed by end-repair and adapter ligation (standard prep) and a modified Nextera tagmentation (Mod Nextera). Detailed protocols are outlined in the Methods.

### Correction of the TC5 terpene cyclase:

For many of the genomes mined in this study for BGCs, transcriptome data were not available. As such, for many of the genes synthesized and expressed here, we relied heavily on intron prediction. For the BGCs analyzed here containing UTCs, we sought to identify gene prediction errors by aligning each UTC that appeared to not produce a novel feature with all of those that did. Such an analysis of the TC5 UTC identified a putative incorrectly predicted intron near the 3' end of the gene, resulting in a premature stop codon and truncation of a well conserved sequence present in all functional UTCs. Shown in fig. S5b is the C-terminal portion the alignment of the all functional sequences along with both the deposited and corrected TC5 UTC, demonstrating that once the incorrect intron boundary is repaired, the well conserved C-

terminus of the protein is present. The ability of the cluster containing the corrected UTC to produce sesquiterpenoids not native to yeast is illustrated in Fig. 4 of the main text.

### Strain analysis and Compound Characterization:

All strains expressing a cryptic fungal polyketide BGCs were cultured and analyzed as described in the Methods using the ionization source parameters defined in (20) table S1. All samples were analyzed using XCMS (20) for untargeted metabolomics resulting in several thousand unique features. Extracted ion chromatograms (EICs) for the top 50 hits when sorted by both p-value and fold change were plotted and subjected to manual inspection in order to identify those spectral features that are specific to the BGC expressing strain as compared to an empty vector control. The necessity of manual inspection is illustrated in the volcano plot shown in fig. S6 in which the p-values and fold changes associated with all automatically identified features are overlaid with those of manually verified “real” features.

These data demonstrate that, with the parameters utilized here, fold-change is a far more useful metric than p-value in determining whether or not a given spectral feature is truly cluster specific. The non-cluster specific features in this quadrant are primarily a result of noise in the spectra or insufficient retention time correction.

**table S1. Ion source parameters used in this study.**

| Ion source parameter     | Dual AJS   | MMI         |
|--------------------------|------------|-------------|
| gas temperature          | 250 °C     | 350 °C      |
| drying gas               | 12 L / min | 7.5 L / min |
| nebulizer                | 10 psig    | 20 psig     |
| sheath gas temp.         | 400 °C     | -           |
| sheath gas flow          | 12 L / min | -           |
| vaporizer                | -          | 250 °C      |
| capillary voltage (Vcap) | 3500 V     | 1500 V      |
| nozzle voltage           | 1400 V     | -           |
| corona discharge         | -          | 4 μA        |
| fragmentor               | 100 V      | 120 V       |
| skimmer                  | 50 V       | 50 V        |
| octopole 1 RF Vpp        | 750 V      | 750 V       |
| charging voltage         | -          | 1000 V      |

Illustrated in figs. S7-S23 are the extracted ion chromatograms (EICs) for all unique features generated by each polyketide producing cluster identified by automated comparative metabolomics using XCMS and deemed real by manual inspection. Strain 137 is a strain constructed with the JHY702 background containing two empty cloning vector and, therefore,

serves as a negative control in all chromatograms shown in figs. S7-S23. For all chromatograms, the ionization source is one of electrospray in either positive (ESI+) or negative (ESI-) mode or multimode ionization in positive mode (MMI+). All m/z values reported here represent the median of the three biological replicates.

For those strains producing isolable amounts of product, compounds were purified as described in the methods and structures were solved using both 1D and 2D NMR. These data are summarized in tables S11-S21 while the spectra themselves are shown in figs. S18-S72.

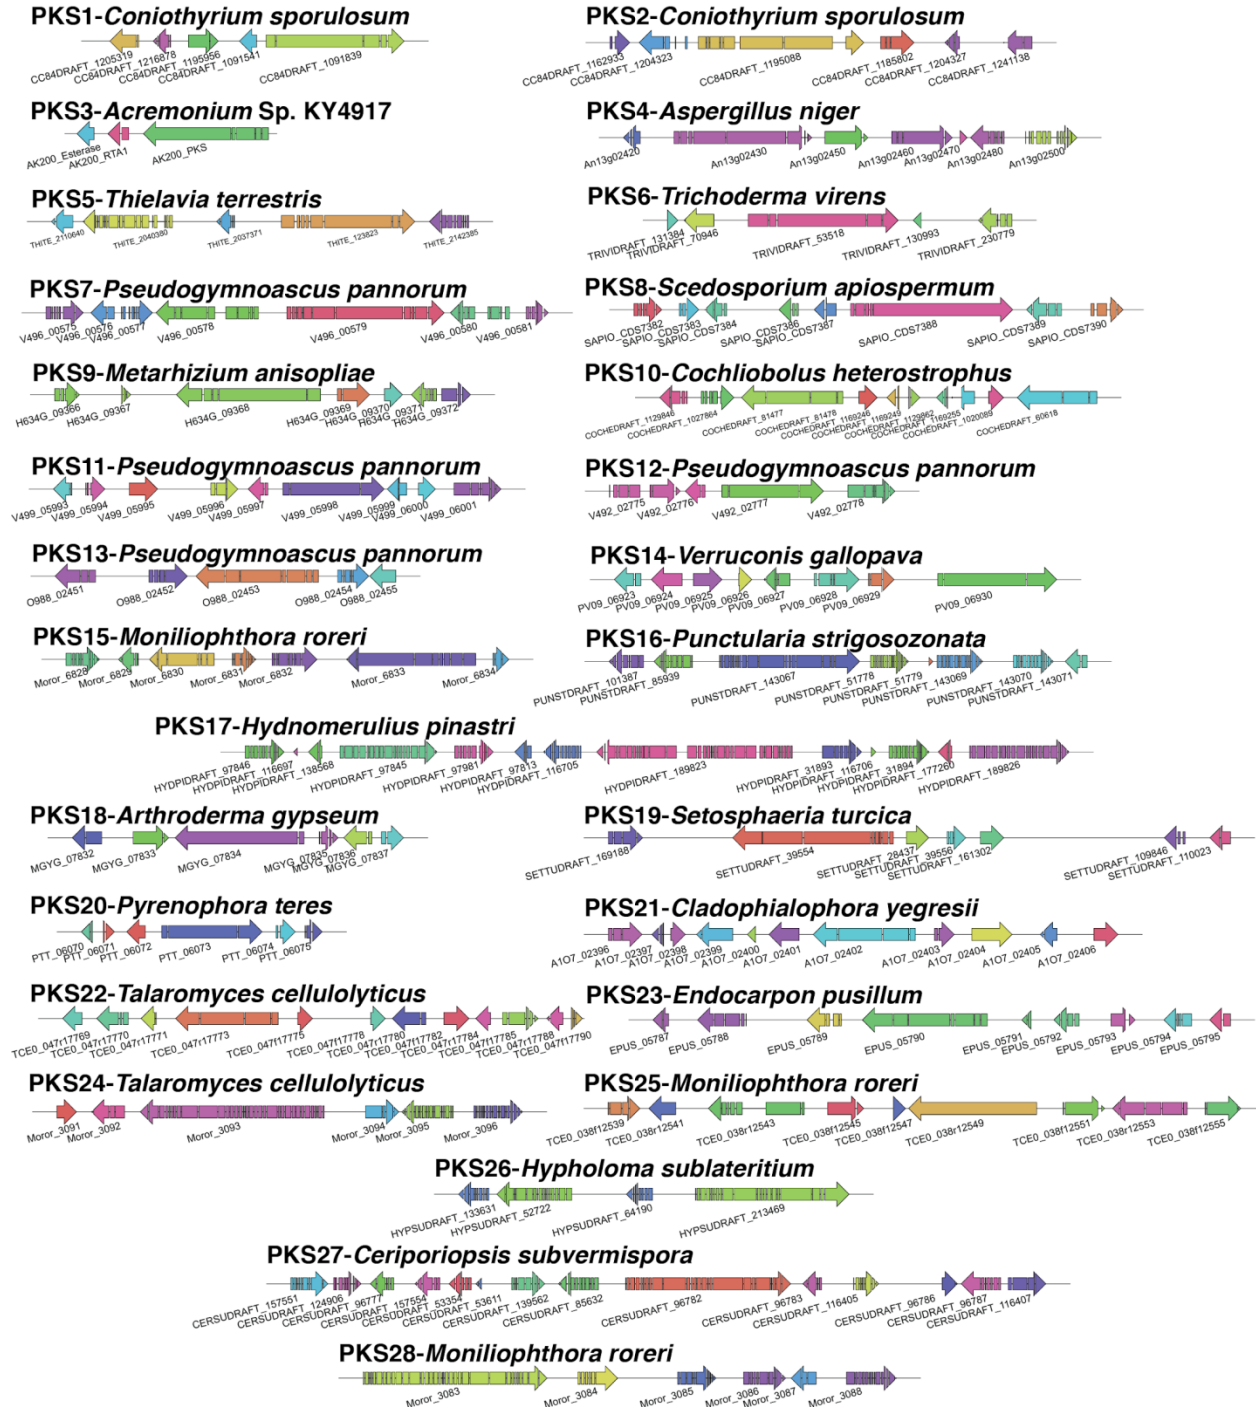

**fig. S4. Schematics of all PKS-containing BGCs examined here.** Gaps in arrows represent introns in genes. All genes are labelled with the locus tag of the sequence as deposited in GenBank.



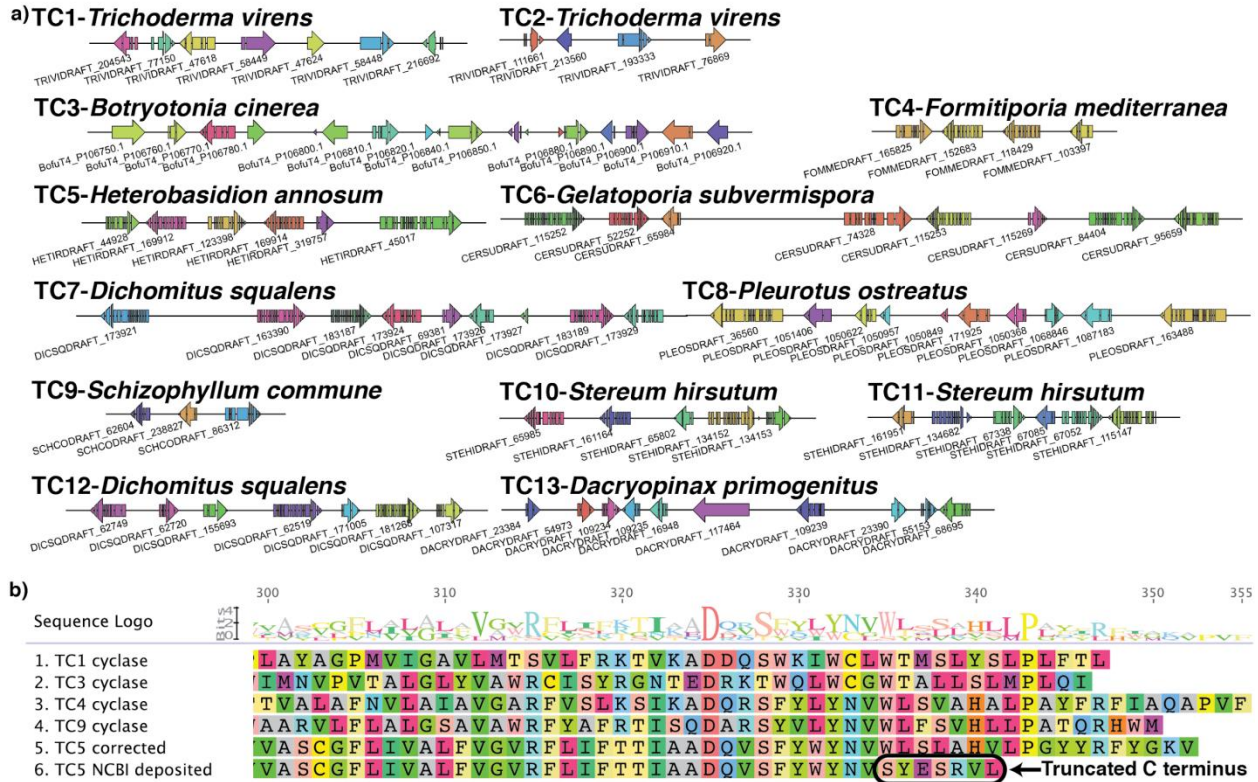

**fig. S5. UTC-containing BGCs examined here.** (a) Schematics of all UTC containing BGCs examined here. Gaps in arrows represent introns in genes. All genes are labelled with the locus tag of the sequence as deposited in GenBank. (b) C-terminus of a multiple sequence alignment of all functional UTC protein sequences along with both the deposited and corrected versions of the TC5 cyclase.



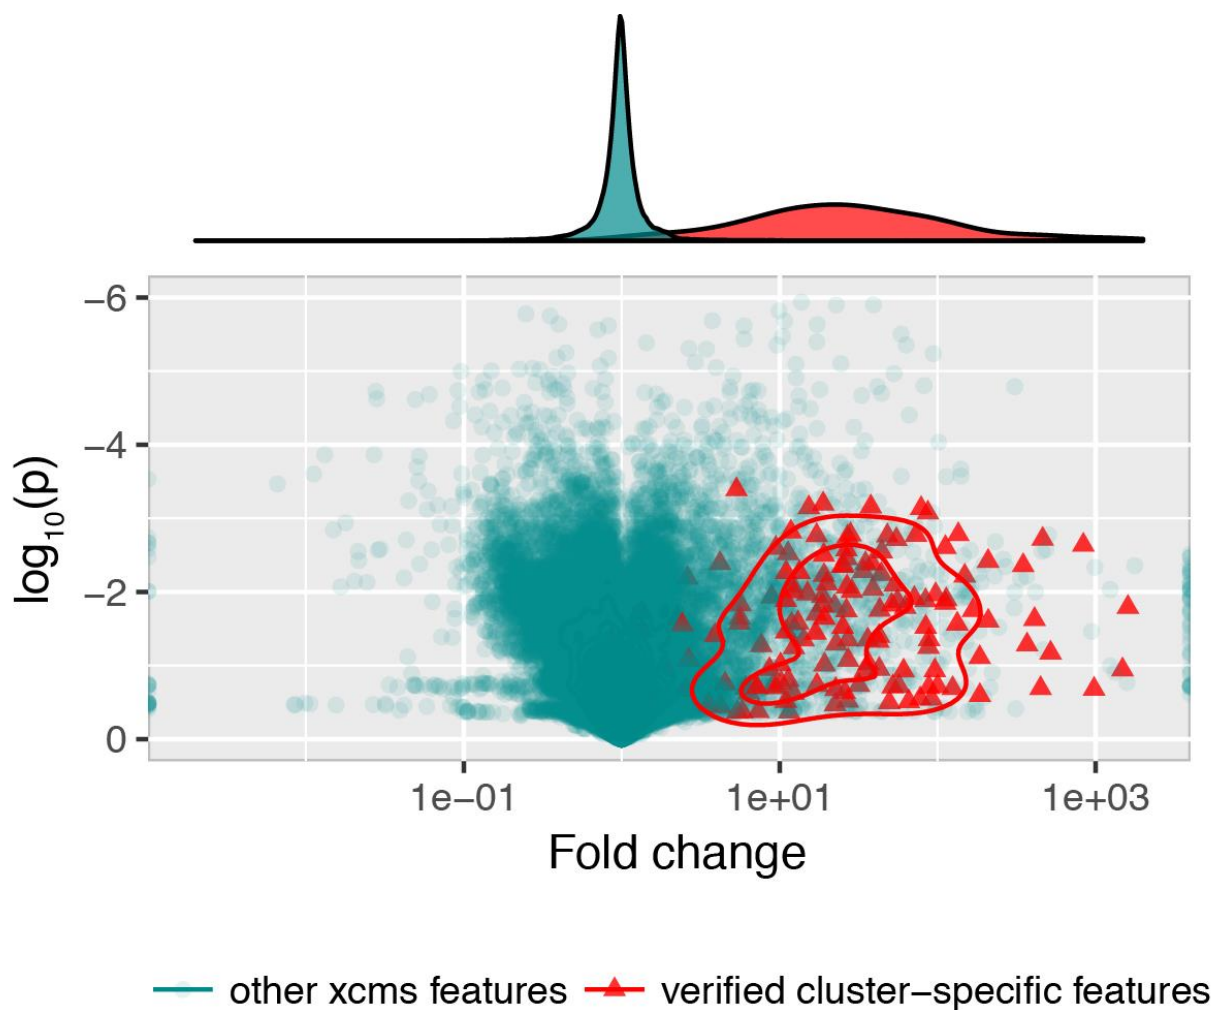

**fig. S6. Volcano plot of all spectral features identified in the automated analysis of strains expressing PKS-containing BGCs.** All features determined to be specific to the BGC expressing strain as compared to a negative vector control. EICs of all BGC specific features are illustrated in figs. S7-S23.

**Supplementary Tables:**

**table S2. Expression data for selected promoters drawn from genome-wide expression studies.**

| ORF       | Gene      | YPD  |      |      |      | YPE  |      |      |      | YPE/YPD |
|-----------|-----------|------|------|------|------|------|------|------|------|---------|
|           |           | 1    | 2    | 3    | Mean | 1    | 2    | 3    | Mean |         |
| YGR192C   | TDH3      | 6.91 | 6.98 | 6.97 | 6.95 | 6.73 | 7.27 | 6.90 | 6.97 | 1.0     |
| YKL060C   | FBA1      | 6.67 | 6.71 | 6.67 | 6.68 | 6.60 | 6.95 | 6.56 | 6.70 | 1.0     |
| YMR303C   | ADH2      | 1.11 | 1.15 | 1.06 | 1.11 | 6.38 | 6.72 | 6.38 | 6.50 | 5.9     |
| YKR097W   | PCK1      | 0.21 | 0.31 | 0.19 | 0.24 | 7.28 | 7.49 | 7.19 | 7.32 | 30.8    |
| YNL117W   | MLS1      | 0.24 | 0.37 | 0.21 | 0.27 | 6.85 | 6.92 | 6.64 | 6.80 | 25.1    |
| YER065C   | ICL1      | 1.98 | 1.81 | 1.94 | 1.91 | 6.13 | 6.22 | 5.96 | 6.10 | 3.2     |
| YBR296C   | PHO89     | 0.58 | 0.95 | 1.08 | 0.87 | 5.42 | 5.49 | 5.13 | 5.35 | 6.2     |
| YLR307C-A | YLR307C-A | 0.13 | 0.18 | 0.12 | 0.14 | 4.28 | 4.74 | 4.37 | 4.46 | 31.5    |
| YGR067C   | YGR067C   | 1.68 | 1.53 | 2.26 | 1.82 | 6.13 | 5.98 | 5.79 | 5.97 | 3.3     |
| YLR174W   | IDP2      | 1.68 | 1.68 | 1.74 | 1.70 | 6.75 | 6.60 | 6.32 | 6.56 | 3.9     |
| YCR010C   | ADY2      | 0.49 | 0.63 | 0.56 | 0.56 | 6.61 | 6.81 | 6.52 | 6.65 | 11.9    |
| YOR178C   | GAC1      | 1.44 | 1.62 | 1.75 | 1.60 | 5.23 | 4.66 | 4.57 | 4.82 | 3.0     |
| YBL043W   | ECM13     | 1.54 | 1.56 | 1.55 | 1.55 | 6.28 | 6.28 | 5.92 | 6.16 | 4.0     |
| YKL187C   | YKL187C   | 2.63 | 2.29 | 2.74 | 2.55 | 5.77 | 5.42 | 5.24 | 5.48 | 2.1     |
| YLR142W   | PUT1      | 1.31 | 1.67 | 1.56 | 1.51 | 4.71 | 4.84 | 4.62 | 4.73 | 3.1     |
| YGR043C   | NQM1      | 0.67 | 1.03 | 0.83 | 0.84 | 4.53 | 4.53 | 4.26 | 4.44 | 5.3     |
| YML042W   | CAT2      | 0.17 | 0.22 | 0.18 | 0.19 | 5.62 | 5.82 | 5.50 | 5.65 | 29.4    |
| YJR095W   | SFC1      | 0.28 | 0.50 | 0.33 | 0.37 | 6.81 | 6.85 | 6.52 | 6.72 | 18.2    |
| YKL217W   | JEN1      | 0.66 | 0.68 | 0.53 | 0.62 | 6.68 | 6.80 | 6.48 | 6.65 | 10.7    |
| YMR175W   | SIP18     | 0.97 | 1.09 | 0.80 | 0.95 | 6.27 | 6.34 | 5.85 | 6.15 | 6.5     |
| YNR002C   | ATO2      | 0.84 | 0.83 | 1.01 | 0.89 | 5.27 | 5.44 | 5.17 | 5.29 | 5.9     |
| YPL201C   | YIG1      | 0.46 | 0.47 | 0.42 | 0.45 | 5.58 | 5.57 | 5.35 | 5.50 | 12.3    |
| YDR256C   | CTA1      | 1.06 | 0.89 | 0.92 | 0.96 | 5.68 | 5.81 | 5.51 | 5.67 | 5.9     |
| YLR377C   | FBP1      | 0.26 | 0.36 | 0.22 | 0.28 | 6.67 | 6.92 | 6.56 | 6.72 | 23.8    |
| YPR006C   | ICL2      | 0.43 | 0.52 | 0.37 | 0.44 | 5.64 | 5.27 | 4.95 | 5.28 | 12.0    |
| YAL054C   | ACS1      | 0.33 | 0.42 | 0.29 | 0.35 | 6.02 | 6.14 | 5.87 | 6.01 | 17.3    |
| YPR002W   | PDH1      | 0.92 | 1.15 | 1.36 | 1.14 | 5.70 | 5.89 | 5.43 | 5.67 | 5.0     |
| YBR050C   | REG2      | 0.82 | 1.07 | 1.16 | 1.02 | 5.25 | 4.73 | 4.52 | 4.84 | 4.7     |
| YPR001W   | CIT3      | 0.73 | 0.70 | 0.86 | 0.76 | 5.01 | 5.15 | 4.70 | 4.96 | 6.5     |
| YOR100C   | CRC1      | 0.51 | 0.64 | 0.68 | 0.61 | 5.41 | 5.16 | 4.86 | 5.14 | 8.5     |
| YIL057C   | YIL057C   | 0.14 | 0.33 | 0.11 | 0.19 | 5.73 | 6.23 | 5.79 | 5.92 | 30.6    |
| YLR312C   | QNQ1      | 1.26 | 1.41 | 1.11 | 1.26 | 4.89 | 4.92 | 4.52 | 4.78 | 3.8     |
| YOR348C   | PUT4      | 0.56 | 0.63 | 0.48 | 0.56 | 5.86 | 5.74 | 5.41 | 5.67 | 10.2    |
| YJL116C   | NCA3      | 1.37 | 1.07 | 1.17 | 1.20 | 4.42 | 4.75 | 4.54 | 4.57 | 3.8     |
| YDR536W   | STL1      | 0.18 | 0.28 | 0.17 | 0.21 | 6.04 | 5.79 | 5.47 | 5.77 | 27.2    |
| YNL270C   | ALP1      | 0.74 | 0.77 | 1.08 | 0.86 | 5.06 | 4.72 | 4.46 | 4.75 | 5.5     |
| YDL085W   | NDE2      | 0.24 | 0.38 | 0.21 | 0.28 | 4.66 | 4.41 | 4.27 | 4.45 | 16.1    |



|         |       |                                                                                                                                                                                                                                                                                                                                                                                                                                                                                                                                    |
|---------|-------|------------------------------------------------------------------------------------------------------------------------------------------------------------------------------------------------------------------------------------------------------------------------------------------------------------------------------------------------------------------------------------------------------------------------------------------------------------------------------------------------------------------------------------|
|         |       | TCACAATTATTTATTGTTTTCTCACATAGAAAATTCGCCATACTGCGATTATA                                                                                                                                                                                                                                                                                                                                                                                                                                                                              |
| YKL187C | FAT3  | GAAAGCTTATTACTGAGTTTTGCGGAGCATCGCTCGGAGCGCGGAATTGAATCGAACCCCGCTGCTATTACCGAACAAAAAATTCG<br>AAAGCATAAAGCTAGTAGTAAAAAATTCGAGAAATTTTCAGATGAGTGGCGACTTTCCAGTCCCTTGGCGTTTTGTCACTTAGTCAGCTA<br>GTAAAGGAGCCGTGTGGTTAGAGTGGCTACAATTCCTCAAAGGGCACTTCTAGAACCACCGGTGAATTTTTTTGGCATGATAAATCG<br>GTAGAATCGGTGAAGTAATACCCAAAAAAGGATCGGATTGTGTTTTCTCGTAATCCGTATTATTGCCGATGGCATCGACTACTTCTT<br>TTTTAGAAACCCCAACAGGGTCTATTGTAATGTATATAAACCTTTTTGTAATGGATATATACATGTGGTACTATTCTCCTCATCCTG<br>CTCCATCGAAAAATCCTCATACGAAGAGTTAGGAAAGCAAAGAAAAACAACAAAAAC |
| YLR142W | PUT1  | AGACACAATGCGAAAAATCGCGCAGGGACATAATTTTTGTTTTTTCATTATTTCTTTCGCTTATCCCTCCGTTAGCTCCACCCTTTTTTGA<br>TTGGAATTTCTTTTCGCAATGGCTTTCCGGTTACCACGCCTCGGGTTTCGATCCCGAAAAAGCATATCTACACAAGAAAAATGAATGA<br>TAAACAATGATGAGTGGCGCTATTTCCCTTATCATCTCATTATTGACTTAGTATCGTCTATTATCAGGAGAATCGCATGAACAAAGC<br>CCATTTTCTCACCTTCTGCCTTTTATATAAAGCTTGTGGAAACCGAACACAACTCCACAAGTCCGTAGCAGCTTCTCTTTTTGT<br>CTTTTATATATCAAAACATCGCTACATAGTAATAACACTAACGCACGTAGAA                                                                                                 |
| YGR043C | NQM1  | AGGGGTAGCGGCTTTTTCATCAACTCGATTATACCCTTTAGAGACCTTCCCTAAAGTGAAGCGCAATTTTCCGGATGTTAGTAGGG<br>TAATATGGTTACGGATTGTGACACAAAAAGGGCTTTCAACAGCTCGGTCGGGTTGAAGGATTTTCCAGGATGACGAAGCTTTCAATAAG<br>AGGGACTGGACTGTTAACCGCGGGAATTAAGTTACTTTCCCTGATCTGGCTCTGGCTCTGCTGATTTTGGCTCTGTACTCCT<br>CGGACTTCTGACTTGAACGAATACGCTTTTTGCTCTCTCTTCCATAGTAGGGGCAATGAGGGGAGCATAGTGGATCCT<br>TCTAACCATCTAGAATGGGGTGACACATATAAAGAAAGAGCACTTTCGAGCGCAGTCAATTTATGCTAAGTATATCATTATTTCTT<br>GCTAGCGTAAGTCATAAAAAATAGGAAATAATACATATATACAAGAAATTAAT                     |
| YML042W | CAT2  | TCCGAAGAGCGTGCTACCAATTTCTCATCTCGTTAACAACTGGTTCCGTTAAAAATTTGCTATATGCTCTATAAGCCAACCTCTATC<br>TATATCTTTTTCTTTAGTCCCTACTTTGGTACTGTTACCACCATTTTAGATTGCTTTTTCTTTTGGCCCTAGCCTTACAATATTTGGCAAA<br>CTTTTTTTTTTAGCCCGGAGACTCTTGTATCTATGCGCGGGCAAGGGCAAAATGACTGCTTATCCCGCCATCCTCCCGCCG<br>CAAGGTTTGAATGGGATTAAGTAAAAACGAATGACTATTCCTCAAAGTCACTTTGTCGACAAAAAAGAAATGAATATACATA<br>TTGGAACAATTTATCCTCTTTTCCCATTTTCGCATATAAGAGCAACTAAACCGCGGTGAGTAAAGTCCCTTCCCTACAGACTCTTT<br>ACTCAGGTATATATATATATATATCCCTTAAAAAATCAAAGAAAGCACTC                  |
| YJR095W | SFC1  | AGCCTAGTCCCGTAAACCGCAACGGACCTTAATTTGACGAAGGGCCCAATTTGATGGTGGGTTAATGATTAGTCCCTATTG<br>TCATAAATAAGTGTGATGATGGAGGAATGATGATACCGTAGTACTACTGCTCGAGGTGCTATCTTTTAAACCAATCCTTTGAGATT<br>TTGTCGCCACGGAGTACTACCTTTTACAACCGTAATGTACATTTTGCATATATCTTATGTATAAATATATAGTTCACTTACTACTTGT<br>TCTCGTTTTGTAACCTTCTGTTGTAGTTCTTCTGTTCTGGCGTTTCCCTTTGTTTTCTATCTGCTTATAAGTAAAGTGAACAG<br>ATTTTGGAAAGTATTATCAATTTGAGTCAATGAAAGAACTTGGCATCTCCCTATTACTAAAACTAAGAATCTTGATTTCAAGAAAGAA<br>TTATATTAGTTTTAGCCGTAAGATAACATAACAAAGAAAGAAAGAAAA                     |
| YKL217W | JEN1  | TCGATCAGCTCCAAATTAATGAAGACTATTGCGCGTACCCTTCCAGATGGGTGCGAAAGTCAAGTATGATGAGGAAAGTTATTGAGCGC<br>CGGCTTGAACATTTTCCCATCTCAGAGCCGCAAGCCTACCATTATTCTCCACCGAAAGTTAGTTTGAAGCTTCTGCACACCATC<br>CGGACGTCATAATTTCTCACTTAACGGTCTTTTCCCGCCCTTCTACTATAATGCATTAGAACGTTACCTGGTCAATTTGATGGAGAT<br>CTAAGTAACACTTACTATCTCCTATGTTACTATCCTTTACCAAAAAAAAAAAAAAAAAAAAAAAAAAATCAGCAAGTGAAGTACC<br>CTCTGATGTATAAATACATTGCACATCTTTGAGAAATAGTTTTGGAAGTTGTCTAGTCCCTTCCCTTAGATCTAAAAGAAAGAA<br>AGTAACAGTTTCAAAGTTTTTCCCTCAAAGAGATTAAATACTGCTACTGAAAAAT           |
| YMR175W | SIP18 | ACATAGTACTGTACGATTACTGTACGATTAATCTATCCACTTCAGATGTTCAACAATTCCTTTTGGCATTACGTATTAATACTTCATAGGA<br>TCGGCACCCCTCCCTTAAAGCCTCCCTAAATGCTTTGCGTACCCTTTAAGACAATATCTTAACTCTGTATTTACTTGCATGTTAC<br>GTTGAGTCTCATTGGAGTTTGCATCATATGTTTAGTTTTTGGAAACGTTGGAGGCTCATAGTATTGGTAAATGGGAGTTACGAA<br>TAAACGTATCTTAAAGGGAGCGGTATGTAATAAGGATAGATGATGATGAATACAGTACGAGGTGAAGAATGATGGGACTGAGAGGG<br>CAATTATCCTCCCTCAGAATCAACATCAAAACATATATAAAGCTCCCAATTCGCCCAAAAGTTTTGTCCTAGGCATTTTTAATCTTT<br>GTATCTGTGCTCTTACTTTAGTAGAAAGGTATATAAAAAAGTATAGTCAAG           |
| YNR002C | ATO2  | AAGTCTTGACTACCCTATCTCACACTAGTACGTAATCAATGTATCATTGTTAGTATGATAGTAGAGACCAATACAGGAAAGCT<br>GACCTTCCCTTCCAATCACCACGGCTGAAATGCTTTGTTGACCAATACGGAGCGTTAAGAGCGGACCGGCTGGAACGGCTCCATC<br>TAAATCGCGGAGGAGGAACCTCCGATACCAGCCGACATGGCAATAATAGTACAGTATGATGCTACAGCCCGCAATAATTTACAG<br>TAGATCATCAACAGTCTCCTCATTCTGGAATGATCAGCAACTTCGACGGATTTAACTCTCAAGCAGTTACGCACTCCGAGAACAGCC<br>GTGATCATCTTTGAACAAGCAAAATATAAAGCAGGAGAACTGCTCCTACCTAGAGTGAATAGCCATAAATAACTATGTAACATTCTA<br>CAGATCAATCAAAACAATCTTCAATCACAGAAAAAATAAAGGC                          |
| YPL201C | YIG1  | TTTTCTAGTTCTTCTGCAATATTGCTTTTTGGGAAGAAGGATCGAAAGTACGATTTGCAGACACGTTTTTACTATATTTACTGTATC<br>TTGATTGCGCGGCTAAAGTTGCCATATTATTTATATTGACGCTCAACCCCGCATTTCGGAGTTTTCTTTTTTTTTTTTGGGGTAA<br>TTTTGGAGTTCGGCGCTATTGGTGGCCGGAATGGTGACACACTTGTAAATATAAAGGAGGAAATCCTACATGTGTATAAGCGAAAT<br>CACAAGGATAAATGATTGCTAAACACCCTCAAGAAAGAAAAATATCAATCAACGAAATC                                                                                                                                                                                          |
| YDR256C | CTA1  | AGCGGTTGTTCTAACCACTATTTAAAGCCGCAATTAGTAAATGCAAAAAAGTTGGCCGGAATTTAGCCGCGCAAGTTGGTGGGGTCCCTTA<br>ATCCGAAAAAGGACGGCTTAAACAAATATAAATCCGAAAAATCCCAAGTACAGAGAATGGAGAAACAACAGTTTTGATATCGCCAT<br>ACATATAAAGAGATGTAGAAAGCATTCTTCACTGTAATGTTCCAAATCGTACATTTGAATTTCTTGTAGGTTTTTAAAGAGTAAAGTAAA<br>TAAATATAAGTACTTACAATAAATTTGAAACCCCTAGAAG                                                                                                                                                                                                    |
| YLR377C | FBP1  | CGGATGGAATCGCCGCTTTTGAATTCACCTCCGGGTATTATTATTCTTAGTAGTCCGGCTCGTGGGACACCCGGAGTTATGCG<br>GGCCCGAAAGCTCATTATGTAGTAAAGCTAGGTAATGTTAAGGGCCTAAGAGCCAAAGCAGCAATAGCCGTGATTTCCACAT<br>ATCAAGAAAGCTTAAAGTTGAGACAGGGAATTTGAAGCGAAGATTGCCGAAGTGGCAATACCCACTCTTTTTTTGGTTGCT<br>TGGTTTTCTCTGCTGCTTGGCAACTTGTGGCATCTCCCACTATATTATAAGGATCGTCTATGTATAGGCAATATTATCCATTT<br>ACTCGTAAACAATGTACGTATATATGAGAGCAACAGTGTGCAATACAGACGTTGATTTTGTCTTGTCTTTTGTATGATA<br>GGCCTAAGAATAACAGTGGCAACATATAAAGAACATCCCTCATACCCACACAT                                  |
| YPR006C | ICL2  | AATTTTTATTTCTCCTTCCATATGAGCGACAGCGGTTACTAGCCGCTGTCTCAGGTTAATGATCCAAGTCCGAGATCCGGCCGAAT<br>ATGCTTGGCGGGAAGAAATAAAGTGCATTGGAGAGAAAGGATATGCTCTTCAATTAAGAGCCGCAAACTAACATCATGCTA<br>GCGATATCATACGTACACTATATAAATAAGGCTTAAAGAAATGCTTCTTATTTCTTAACTTTTTTGGCGGTTGAAGAGCTTATA<br>AAAGTACTAGTGGCCTAAGAAGCTACAGCGCCGATAAATAATCGATTTCGACTTTTCTAGTATTTCCGCG                                                                                                                                                                                      |
| YAL054C | ACS1  | TGTGCACATACGTCAGAAATGATATCAAGATAAATGGCACGCTGATGACGGCTGTGAAATATGATAATCATCTCGGACGAACGGCG<br>TAGCACTCTCCATCCCTAAAAATGTTACGTGTGACTGCTCATTTCGCGGATGTCGAGATGACCCCGCCCTCAAAGGCACTC<br>ACCTGTTGACATGCCGTGGCAAAATGATGGGGTCACTTTTTTTCTGTTATCTTAAAGTCCAAAGAAAGTAAAAAAGGTTGG<br>GGTACGAATTCGCCCGGAGCCTCGGATGCAATTAATCAATGGGATTTGCAAGTGGGGTACAGTTCCTCGGTGGCAAAATAGTTCCCT<br>CTTTTTGTATATAAAGTGGCGCTATTCTAAGCATTTCTCCCTTAGTTATCTGGTAGTACGTTATATCTTGTCTTATATTTCTA<br>TCTATAAGCAAAACCAACATATCAAACTACTAGAAGACATTTGCCACTGTGCT                        |

|                          |      |                                                                                                                                                                                                                                                                                                                                                                                                                                                                                                                                |
|--------------------------|------|--------------------------------------------------------------------------------------------------------------------------------------------------------------------------------------------------------------------------------------------------------------------------------------------------------------------------------------------------------------------------------------------------------------------------------------------------------------------------------------------------------------------------------|
| YPR002W                  | PDH1 | AATATAAATAAAATTCATACAGCATGTCTAATCATAGCTAATTTATACATATTCATCATGAAAAACATATAGGGGAAAAATATGGTCGGTTA<br>ACACACCTATCAAAAAATTTACAGCAATTCGAATCTCGTTAGTAAAAATATCTTATTTTTTTTTTTCTGATTGATTTATTTCTGG<br>AGTTTTGACTTATTTTTTACACATCGCGCTTTTCGTCCCAATCTCTCTGATATATGATGCTGTCTATAGGTAGCCACTCCCGGATG<br>TCGGACCTCGGGCCGTTTACAACTTTATGAGATGACCTTATTTCTCCACATTTAGTCATTCAACTTTTACCCCTCATATGTTACCTT<br>CACTAATGTAAAGCATGACCAAGAAAGGTATAAGGTATAAATCTGCCATAATGTATGTATAAATTATTAGGACTTTCTCAAATAG<br>TATTTTTGGTATTTTCTACTGTTCTGTGATGTCGAGAACAAACAGA          |
| YBR050C                  | REG2 | AAGTACGATATGGTATAACTGTAACTTGAAGGACTGAAGGACTGAAGGACTGAAGGACTATAGTCAAGGGCCAATGGGGAAGGTC<br>CTTCCAGGCCATTTGCCCGATAGTTTGTCTTCTCTTCTTTCCGACGGCCCGATTGCATGTGGCGGGGACGACTGGATAAAAAA<br>CGTGGGGGAGTATTAATTTTACGCTTATTTGTCAACACGGAACCTTATAGTTATCATTACTAACATCGCAACAAAGCTGCTTTT<br>TACTCGTTTTAGCCACACCATACCCCTTTAATTAACATAAATGCATAAAATAGTTATTTGCTTCTGAGTTGACGCTTCTCTCGGAC<br>GTACTGTTATATGGCATGTCTTCCGATGCTTCAAAATTTAGCGTTGTCTCGAAACTTAGGCTGTCTTCTGCTGTCTGCTTCTGA<br>TAAAAATAATATTGGAAATAGAAAAAATAAGGAACAAGAAAGTGTGTGAGA                  |
| YPR001W                  | CIT3 | ATATTATTCAGTTGAAAGACAAAAACATAAATTTCTATGAGCAACAATTTGAACGAAAAATAAAATTTGGGGAAGTGACACCA<br>TGGTAGCGGTTCTAAAGCGAAATCGGCAAGCGGCTAAATAGCAGTTTTGATGACTTACTCCACTGAAAAATGGATGACCTTAAATA<br>GGAGATAAAGCTTTTTCATCCCTATGATTTAAGTAGCTGGCTTGTCAAGCATTCTAATCATAAAAAAGATCGTATTTGATCAAGAA<br>TTTATACATAGACGGCGCTAAATAATTGAATACAAA                                                                                                                                                                                                                |
| YOR100C                  | CRC1 | CTCGTTTGGCGTTACATTGCATTGATGGTACAATAAAGGGCATGCTTTATATCGAGATGTTTCAGTGTATATGAGGGGAAACAGAAAA<br>CGTATTCTGCCATTTTTTGGTCACTGCTTTTTCTGCTATGAGTAATGGTGAAGTTCCCTGTGGGCAACGCTTATGCTATCGGGTTA<br>CTGCTCCTAATATCCGCATATAAGCTTTATGCAGGGATCAGTTGGCGGCTATTTTCTACACCCAGTCATCCGGCGTACTGGATCT<br>CCACTTGGCCCAATAAGTCGGTGGCAAAATGGAGATTTAAGAGTAAAGATGCATGATGGTATAAATCTTCTTAGTCGAAATAGATATAT<br>TCAAGCGCATATATAGGACAGCCTGTACTGTGAAATAGCCGATTTCAATTCGCTCTATGTGTGTTTTTATCCAGGTTTTCTTTG<br>GATTCTACGTATTGTACGACTTTCTTATCTCCACAACGTCATCGTGTGAGT        |
| YIL057C                  | RGI2 | CCCAACAGATTTCAAGTCTGTGCGCTTAACTACTCGGCATAGTGCCTAAAAAATGTAGGTTATTTAAGCAAGTATTGTAGATACTTTT<br>CGTAATAAACTACAATGCACCCAGACTCGCGGTGAATGATGGCATGAAATCATTGAACGAAGTTTTGCGGCTATACGGCTGAAGGA<br>CGAGACTAAAGGGACAGGAATTTAATCGGGGTATAATTTGAATAGTATTACGGGCACTGCCGTTTAGCCATCAAAATGCTATTGTT<br>GGGGTATTCTCTACTTTTTTGTCTTGGCTTGAACCTTTTCCGGCGTTGGCAATCGTCCGATATAAAGCATCGGCTGTCCAAATCCTC<br>TATTGCCTTTTCCCTTGCACCTCTTCAATTTCTGTATCTTTCCGCTAAAGGTAGATCTTGATTCACCTATCTGTGCAAAACAGAT<br>TAAGTGCAACGAAACAACGTACAGTATATAACAAGTATTTTAAATAAATAAGA      |
| YLR312C                  | QNQ1 | CATCAATTAGGGCAAACTTGAATAGTCAAGTGGTGCATATATTTAAATCAATTAGCCCTATGACTACATTAGGTTTTATTGTTAGGTCCTT<br>ACGGCTGCATATTTGCTTTTCGCGCTTTCGCGGGTCTCGCAGCATTTCGCGCGCTTGTATGGGTGGAGTTTATCTGCTTACCCCT<br>CCGGACCCCTACCCCGGTGTGCCCGGTCATCTATCCATTTTGGGTAACCCCTTTCGCGGACAGCTGCTTATCAAGGTACCTG<br>GATCGAGCCATAAAATGATCTACACAGATGAGATGGGCGATTGGGATATATTATTAGTCGGAGTATCATTATAGTTATTCAGTTTTAT<br>GCAGGTTACTGGCCAAACGTTTTTCTTCAATTTGGAAATCGTTTAGGAGCTACTGTTCCGGTATAAAGTAACAACGACAGTAGCAGAG<br>TAATACGACGTGACGATAATAGAGACTAGTAAACAGTCGAGTTGTGCGGACCTAAA |
| YOR348C                  | PUT4 | GCTATGACGTTTTGGGTGGCCTAGCCGTTTCGCGTGTGCGCTGCTGCTTTTTCGCTTTTCAACTTGTGCCGATATTTCTATCAAAGG<br>AAAAATGGGACGTTTTCAACCCCTCGCTATCATCTGCGCTGCACTCTGCTATCGCAACTACACCGGGTTTTTATCTGCTTACCCCT<br>CCATCCAGTGTGATAACAAGAAGAACCTTGCAGGGTAGGGCAGGACCTACGGCCAAATACTAATATGTCTGTTTATGTACATGCC<br>CCAATCTGAATATTCATGAATGTAGGCACAGCATATCTCCATCCATGACTGATACAGACGATAAACAATATATGTATATACATCTTA<br>TACACTCGAATATTTGTAGACTGTACTTCTATATATATAGGGGGTTTTGTGTTCTCTTCTTCTTTTTTCTCTCTTCCCTTTC<br>CAGTTTTCTTTATCTTTGCTGTTTTGGAAGAACACACCATCAATGAATAAATC           |
| YJL116C                  | NCA3 | TAGATGCGCCATCTCCGAGAAAAATCTAGACAATAACAGCGACAATTAACCTAAAGAGGATAGAAGATCGAGCAAAAAATTTTTTTA<br>ATATGGGTCAGTGGCGATATTACTATAGGAGTTAAAGAGTAAGTTGAGTGAAGGTGGTGAATATGAACTCCGAACTAA<br>GCGCCGATTATGGGTGGCAAGCGGACAGCTTTTGTATATAATCGATCGCTCTCGTAGTTGATATCTCTCTCTTCTTCTTTTCC<br>TGATATAGTATATGTGTACATACAGATACGAATATACCTCAGTTAGTTGTTTTAACATTAATAATCAACAGTTGCCAGTAGCAAAAA<br>AATATATCCATTCATTTCGAGCTTTTTCTGCTCTACTACTGATATCAACAAGCCCTTTATTGATTTTGAATAATTTTTGTATACGTGTTCTAGC<br>TATAACTAGTATAGTCGCACATACTTAACTCGTCTCTCTAACACATA               |
| YDR536W                  | STL1 | CTACGTCGCTGTTTCGAGCGGCTGTTGCTGTCATGAACTAAAAAAGCGGAAAGTGTCCAGCCATCCACTACGTGAGAAAGAAAT<br>AATGGTTGTACACTGTTTCTCGCTATATACCGTTTTTGGTTGGTAACTTCTCGCCAGGTGCAGTTATGCGCTTGGCTGCTCGGAT<br>AGTAGTAATCTGAGAAAGTGCAGATCCCGTAAGGGAACACTTTTGGTTACCTTTGATAGGGCTTTTATTGGGGCATTGTAACAA<br>AAAGGAAGTAGATAGAGAAATGAGAAAGCTTAAAGTGAATGTTTTAGCTTCAATTTTTCGCCCTTCAACCGCTGCTTGGCCTTAGAGGG<br>TCAGAAATGCAGTTCAGGAGTGCACACTCATAGTATATAACAAGCCCTTTATTGATTTTGAATAATTTTTGTATACGTGTTCTAGC<br>ATACAAGTTAGAATAAATAAAAAATAGAAAAATAGAAATAGAAAGTTTATAGACC        |
| YNL270C                  | ALP1 | GAGCTATAGTCTTTTTGCGCTTTCAATACGTGTAGCGGTGACCAAAAGTTGCACAAAAATGTAGTTGTCAATGAAAGCGCACTACGTAT<br>ATAATGACTATTTTTTTTTCTGCGTTGCATGGGTAATTTGTTAATATGCGATTTTCTTGGGAAAAAGGTGCATAGCGCCAAAG<br>ACTGCCGTGCGGCACAGTATGATGTTTTGAGTCCGCGGCTTTAAGGGCTTGCATAAAAAGTGGTTCAAGCGAGTGATAAGTTGG<br>CGCAATGTCGCTTTTTTGTAAACATGCTTTTCTGAAAACAACCTGTAGGACGCTCCACTCCACATAAGGGCTTTCTCCAATGGCAAT<br>GGAGCTCGGAACACCGGAGTAGAAAAATTTAATGTGTATTGTATAAAACTTGTCTTGTATGCAAGTTTTGTTTTTTTGTACTCTTC<br>CGTAGCACAATAGACATATATTAGCGGCAAAATGTAGTGTGCGATTATTGCC          |
| YDL085W                  | NDE2 | GTGTAGTATTGATCTTTGTTGTTATGTAGAAATGCTTACGCAACTGTATAAAATATGGAACAGTTGCCATGGCAAGACAAAAAAG<br>TGATCTTGAGTGAATAATAGAGCCCGGATGGCCGGTAAATTAACCGCTCGTACCCTTTAATACGCATAAACGCCGAAAAATGTC<br>TCTATTTTGTGATTTCCCGAGGTGCGGATTTGGGTACACCTGTATGCGTTCCTTAGTGCCGATAGATATACTAATATCGATGCGTCA<br>CAGTAGCAGATCATCTGACACTGTTTTCCCATTTTTTTTTTCAATTTTTTAAAGGGTTCTCTACAGCCTACAGGCTCCCTAATAA<br>GTCAGCCCTCCCTTTGGAGTGCCTGTTGACCTGCTATATAAGAGGTATATCAGTGCCAGTAGGTAACCCATCTTGGGGGATTG<br>TACCAGGAACATAGTAGAAAGACAAAAACAACCCGCTTTGCCATTGATAG                 |
| <i>S. bayanus ADH2</i>   |      | GATCCAGTTCTCCAGTGACACAGCCTTTATCTGGTCAAACTTTCTTTCTAATCACCTATGCTGATGCTTAATTAAGGGATTTTTGTCTC<br>CATCAACGGCATGCGCCAAAAATGACGTTTTTTTTTAAACCATAGACACGAACTACCCATTTTCCACCGGCTGACCTACCACCGGA<br>ACAAACGGCCATCCAACTTGCAGTTGGGAAATTAAGAGCATCGCAGTTTAAATGGAAAGAAAAAAGGTACAGCACAGCCGAA<br>ATGGAGTTAGTCCCTTATGTGCACACACTCACACAGTCCGTCAGATCAAGCTACTGGGTGCGTATAAATAGAGTGGCCATTGCCA<br>CCCTGTTTATCTCAAAATCTGCTTGTAGTGGTCTTCTCCCTTTTTCAGGTTACAATTTCTTTGTTTCTACTTATAGTATAAGTATATCAA<br>GCTATATTAAGCATACTACTCACTGTCAACTTATCTCCAAATACAAATACAAA      |
| <i>S. castellii ADH2</i> |      | TGTCGTGGACGAAATACGCCACAATTTGCCGAGAAGGTCATTAGTATGTCCAAAGAACCCCTAGGTTGAAAGTCGGGAAATCCGAAATC<br>TCCGATTTTGGAGGGGCCATGCCCTACTTTTTTTCGCGAGGGGTGAAATTTCAAACCCGTCGCGGTTCTTGGAAATTTGACAGCGCAT<br>TGAGTATGTCTGCGTATTTCCCACTATCATACCGCCCTTTTCTGGGAAAAATGGAACCTGGATGCTGAAATATTTCACTCTCAGATC<br>ACATATCCCAATCTCTGAGTGAATTTTGGTTCAGGCGACCAACAGGAATATGGAATAGATTCTATTCTCGGATTTCACAATATC<br>CATTGTAGCAAAACAAAAAAGCTGGTGTATATATTCAGAGCCTAAAAATTAAGGTTGGATCTCAATTTTAAAGTTTTTCATTCTG<br>TTTTGTTTTTGTCTTCTTAGCTACGAAATACCAAAACAAAAACAATCAATA       |

|                                        |                                                                                                                                                                                                                                                                                                                                                                                                                                                                                                                                          |
|----------------------------------------|------------------------------------------------------------------------------------------------------------------------------------------------------------------------------------------------------------------------------------------------------------------------------------------------------------------------------------------------------------------------------------------------------------------------------------------------------------------------------------------------------------------------------------------|
| <p><i>S. kudriavzevii</i><br/>ADH2</p> | <p>CTCTCAAATCTTTTAGCGCCAAGGACTCCAACATAATTGTATCTTGAATTTGCCTTTACGATCCGTTTGTCCAGTCACGGCATGTATATCT<br/>TATTAATCCTGCCTTTCTAATCACGTATTCTAATGTTCAATTAAGGGATTTTATCTTCATCAACGGCTCCCACGCAAAAAATGACGTTTTG<br/>CACACAGACACGAAATACACCTTCCACCGGAACAACGGCCATCTCCAACCTATAAGTTGGGGAAATAAGACAATTTAGACTTCAGAG<br/>AATGAAAAAAAAAAGGTACATCACAGATGGGGTTCAGGTTTGTACAATTGCAGGGAGCCTGTCACATATAAATAGACCTCCAGTG<br/>ATGATATCTTTCAGTCTTCAAACGTCTCTTGTACAGTTCTGGTCTATATCACATCTCTTGGTTCTACTTATTGTCTATAATATC<br/>AAGCTACAGCAAGCATAACAATCAACTATCTACCATAACCATAATACACA</p> |
| <p><i>S. mikitae</i> ADH2</p>          | <p>TTTCCCAAAAAGTATTATTTTAAAGTGATAATTGATAAAAGGGGCAAAACGTAGACGCAAATAAAACGAAATAATGATTCTCAGACCTT<br/>TTAGCGTCAAGAAGTCAACTAATCTTATCTTAAATTTATCTTTATAATCCGTTTCTCCCGTCACAGTCTGTGTATCTGATTAATCCTGCC<br/>TTTCTAATCACCTATTCTAATGTTCAATTAAGGGATTTTGTCTTACCAACGGCTTCCACCCAAAAGTAAAAATGACGTTGTACCCACA<br/>GACATCTTACCAGCCTGACCTGCCACCGGAACAACGGCCATCTCCAACCTATAAATGGAGAAATAAGAGAATTTAGATTCTGGAG<br/>GATGAAAAAAAAAAGGTACAGCATAAATGGGGTTTTATGTGGGTACAATTACACTAGGACTATCACATATAAATAGACGGGCAATGTA<br/>GGTTCTTTTCCACCCTTGAGACAGAGTTATTC</p>                 |
| <p><i>S. paradoxus</i> ADH2</p>        | <p>TAGTCTTATCTAAAAATTTGCCTTTATAGTCCGTCTCCAGTCACGGCCTGTGTAACCTGATTAATCCTGCCTTTCTAATCACCTTCTAC<br/>TGTTAATTAAGGGATTTTGTCTTTCATCAACGGCTTCCGCCAAAAAAGTATGACGTTTTGCCCGCAGGCGTGAAGCTGCCCATCTT<br/>CACGGGCTGACCTCCTCTGCCGGAACACCGCCATCTCCAACCTATAAATGGAGAAATAAGAGAATTTAGATTTTCAGAGGATGA<br/>AAAAAAAAAGGTAGAGACATAAAAAATGGGGTTCACTTTTTGGCAAAGTTACAGTATGCTTATTACATATAAATAGAGTGCCGATAATG<br/>GCTTTTTTTCATCTTCGAAATACGCTTGTACTGCTCTTCCAGCGTTTTTATTACTTCTTTCTTCTTCTCCTTAGTATATAAATATCAAG<br/>CTACAACAAGCATAACAATCAACTGTCAATTATATAAATACACT</p>        |

**table S4. Background strains used throughout this study.**

| Strain      | Parent | Genotype                                                                                                                                                                                                                                                                                              | Reference  |
|-------------|--------|-------------------------------------------------------------------------------------------------------------------------------------------------------------------------------------------------------------------------------------------------------------------------------------------------------|------------|
| BY4741      | S288C  | MATa his3Δ1 leu2Δ0 met15Δ0 ura3Δ0                                                                                                                                                                                                                                                                     | (38)       |
| BY4743      | S288C  | MATa/α his3Δ1/his3Δ1 leu2Δ0/leu2Δ0<br>LYS2/lys2Δ0 met15Δ0/MET15<br>ura3Δ0/ura3Δ0                                                                                                                                                                                                                      | (38)       |
| BJ5464      |        | MATα ura3-52 trp1 leu2-Δ1 his3-Δ200<br>pep4::HIS3 prb1-Δ1.6R can1 GAL                                                                                                                                                                                                                                 | (43)       |
| BY4743ΔDNL4 | S288C  | MATa/Matα dnl4Δ/dnl4Δ                                                                                                                                                                                                                                                                                 | (73)       |
| Y800        |        | MATa ade2-1 leu2-Δ98 ura3-52 lys2-801<br>trp1-1 his3-Δ200 [cir0]                                                                                                                                                                                                                                      | (51)       |
| DHY213      | BY4741 | MATa his3Δ1 leu2Δ0 ura3Δ0 met15Δ0<br>SAL1+ HAP1+ CAT5(91M) MIP1(661T)<br>MKT1(30G) RME1(INS-308A) TAO3(1493Q)                                                                                                                                                                                         | This study |
| JHY693      | DHY213 | MATa his3Δ1 leu2Δ0 ura3Δ0 met15Δ0<br>SAL1+ HAP1+ CAT5(91M) MIP1(661T)<br>MKT1(30G) RME1(INS-308A) TAO3(1493Q)<br>prb1Δ pep4Δ                                                                                                                                                                          | This study |
| JHY651      | DHY213 | MATα his3Δ1 leu2Δ0 ura3Δ0 SAL1+ HAP1+<br>CAT5(91M) MIP1(661T) MKT1(30G)<br>RME1(INS-308A) TAO3(1493Q)prb1Δ pep4Δ<br>lys2Δ0                                                                                                                                                                            | This study |
| JHY692      | DHY213 | MATa his3Δ1 leu2Δ0 ura3Δ0 met15Δ0<br>SAL1+ HAP1+ CAT5(91M) MIP1(661T)<br>MKT1(30G) RME1(INS-308A) TAO3(1493Q)<br>prb1Δ pep4Δ ADH2p-npgA-ACS1t                                                                                                                                                         | This study |
| JHY705      | DHY213 | MATα his3Δ1 leu2Δ0 ura3Δ0 SAL1+ HAP1+<br>CAT5(91M) MIP1(661T) MKT1(30G)<br>RME1(INS-308A) TAO3(1493Q) prb1Δ<br>pep4Δ ADH2p-CPR-ACS1t lys2Δ0                                                                                                                                                           | This study |
| JHY686      | DHY213 | MATα his3Δ1 leu2Δ0 ura3Δ0 SAL1+ HAP1+<br>CAT5(91M) MIP1(661T) MKT1(30G)<br>RME1(INS-308A) TAO3(1493Q) prb1Δ<br>pep4Δ ADH2p-npgA-ACS1t lys2Δ0                                                                                                                                                          | This study |
| JHY702      | DHY213 | MATa/MATα his3Δ1/his3Δ1 leu2Δ0/leu2Δ0<br>ura3Δ0/ura3Δ0 SAL1+/SAL1+ HAP1+/HAP1+<br>CAT5(91M)/CAT5(91M)<br>MIP1(661T)/MIP1(661T)<br>MKT1(30G)/MKT1(30G) RME1(INS-<br>308A)/RME1(INS-308A)<br>TAO3(1493Q)/TAO3(1493Q) prb1Δ/prb1Δ<br>pep4Δ/pep4Δ ADH2p-npgA-ACS1t/ADH2p-<br>CPR-ACS1t met15Δ0/+ lys2Δ0/+ | This study |

**table S5. Features integrated for the determination of sesquiterpenoid titer in Fig. 2B.**

| M/Z      | Formula                                                          | Ion                       |
|----------|------------------------------------------------------------------|---------------------------|
| 203.1794 | C <sub>15</sub> H <sub>22</sub> + H <sup>+</sup>                 | SQ - H <sub>2</sub>       |
| 205.195  | C <sub>15</sub> H <sub>24</sub> + H <sup>+</sup>                 | SQ                        |
| 221.1899 | C <sub>15</sub> H <sub>24</sub> O + H <sup>+</sup>               | SQ + O                    |
| 227.1776 | C <sub>15</sub> H <sub>24</sub> + Na <sup>+</sup>                | SQ                        |
| 237.1848 | C <sub>15</sub> H <sub>24</sub> O <sub>2</sub> + H <sup>+</sup>  | SQ + 2O                   |
| 239.2005 | C <sub>15</sub> H <sub>26</sub> O <sub>2</sub> + H <sup>+</sup>  | SQ + H <sub>2</sub> O + O |
| 241.2161 | C <sub>15</sub> H <sub>28</sub> O <sub>2</sub> + H <sup>+</sup>  | SQ + 2H <sub>2</sub> O    |
| 243.1725 | C <sub>15</sub> H <sub>24</sub> O + Na <sup>+</sup>              | SQ + O                    |
| 259.1674 | C <sub>15</sub> H <sub>24</sub> O <sub>2</sub> + Na <sup>+</sup> | SQ + 2O                   |
| 261.183  | C <sub>15</sub> H <sub>26</sub> O <sub>2</sub> + Na <sup>+</sup> | SQ + H <sub>2</sub> O + O |

**SQ = Sesquiterpene (C<sub>15</sub>H<sub>24</sub>)**

**table S6. Order of promoters and terminators used in the expression of all cryptic fungal BGCs examined in this study.**

| Gene order | Promoter                          | Terminator        |
|------------|-----------------------------------|-------------------|
| 1          | P <sub>ADH2-S. cerevisiae</sub>   | T <sub>ADH2</sub> |
| 2          | P <sub>ADH2-S. bayanus</sub>      | T <sub>PGI1</sub> |
| 3          | P <sub>PCK1</sub>                 | T <sub>ENO2</sub> |
| 4          | P <sub>MLS1</sub>                 | T <sub>TDH2</sub> |
| 5          | P <sub>ADH2-S. paradoxus</sub>    | T <sub>ADH1</sub> |
| 6          | P <sub>ADH2-S. kudriavzevii</sub> | T <sub>CYC1</sub> |
| 7          | P <sub>ICL1</sub>                 | T <sub>TEF1</sub> |
| Last       | -                                 | T <sub>TEF1</sub> |



**table S7. Standard part plasmids and expression vectors used for the assembly of cryptic BGCS in this study.**

| Plasmid   | Insert                                                        | Yeast Marker | Description                                                                                                                         |
|-----------|---------------------------------------------------------------|--------------|-------------------------------------------------------------------------------------------------------------------------------------|
| pCH900    | T <sub>ADH2</sub> -P <sub>ADH2</sub> - <i>S. bayanus</i>      | None         | Template for amplification of terminator one fused to promoter two.                                                                 |
| pCH901    | T <sub>PGI1</sub> -P <sub>PCK1</sub>                          | None         | Template for amplification of terminator two fused to promoter three.                                                               |
| pCH902    | T <sub>ENO2</sub> -P <sub>MLS1</sub>                          | None         | Template for amplification of terminator three fused to promoter four.                                                              |
| pCH903    | T <sub>TDH2</sub> -P <sub>ADH2</sub> - <i>S. paradoxus</i>    | None         | Template for amplification of terminator four fused to promoter five.                                                               |
| pCH904    | T <sub>ADH1</sub> -P <sub>ADH2</sub> - <i>S. kudriavzevii</i> | None         | Template for amplification of terminator five fused to promoter six.                                                                |
| pCH905    | T <sub>CYC1</sub> -P <sub>ICL1</sub>                          | None         | Template for amplification of terminator six fused to promoter seven.                                                               |
| pCH906    | T <sub>PGI1</sub> -Ura3-P <sub>PCK1</sub>                     | None         | Template for amplification of terminator two fused to the Ura3 cassette and promoter three.                                         |
| pCH907    | T <sub>PGI1</sub> -His3-P <sub>PCK1</sub>                     | None         | Template for amplification of terminator two fused to the His3 cassette and promoter three.                                         |
| pCHINT2A  | L3-P <sub>ADH2</sub> -flag-MCS-T <sub>TEF1</sub> -L4          | None         | Cloning vectors generated for this study for assembly of >3 genes. Yeast selectable marker must be included on an assembly fragment |
| pCHINT3A  | L5-P <sub>ADH2</sub> -flag-MCS-T <sub>TEF1</sub> -L6          | None         |                                                                                                                                     |
| pCHINT2LA | L3-Leu2-P <sub>ADH2</sub> -flag-MCS-T <sub>TEF1</sub> -L4     | Leu2         | Cloning vectors generated for this study for assembly of 1-2 genes. Yeast selectable marker is included on the vector backbone      |
| pCHINT3HA | L5-His3-PADH2-flag-MCS-TTEF1-L6                               | His3         |                                                                                                                                     |

**table S8. Coordinates of native loci from which all clusters examined here were derived along with the IDs of plasmids expressing the engineered cluster versions.** Annotated Genbank files for all plasmids is included in the Supporting files.

| Cluster | Native Locus       |         |         |        | Engineered Cluster Plasmids |                |               |
|---------|--------------------|---------|---------|--------|-----------------------------|----------------|---------------|
|         | Genbank ID         | Start   | End     | Length | Plasmid 1                   | Plasmid 2      | Plasmid 3     |
| PKS1    | KV441552           | 530394  | 546723  | 16329  | pCHCS100.1-2.2              | pCHCS100.2-2.2 | -             |
| PKS2    | KV441551           | 60641   | 83767   | 23126  | pCHCS163.1-2.2              | pCHCS163.2-2.2 | -             |
| PKS3    | Deposition pending |         |         | 9892   | pCHAK200.1-2.2              | pCHAK200.2-2.2 | -             |
| PKS4    | AM270992           | 578654  | 603367  | 24713  | pCHKU27.1-2.2               | pCHKU27.2-2.2  | -             |
| PKS5    | CP003009           | 8730831 | 8753560 | 22729  | pCHKU28.1-2.2               | pCHKU28.2-2.2  | -             |
| PKS6    | ABDF02000052       | 9685    | 28459   | 18774  | pCHKU30.1-2.2               | pCHKU30.2-2.2  | -             |
| PKS7    | JPJY01000093       | 2671    | 30026   | 27355  | pCHKU31.1-2.2               | pCHKU31.2-2.2  | -             |
| PKS8    | JOWA01000110       | 1607857 | 1643205 | 35348  | pCHKU32.1-2.2               | pCHKU32.2-2.2  | -             |
| PKS9    | KE384750           | 270098  | 292755  | 22657  | pCHKU33.1-2.2               | pCHKU33.2-2.2  | -             |
| PKS10   | KB445572           | 91380   | 115199  | 23819  | pCHKU34.1-2.2               | pCHKU34.2-2.2  | -             |
| PKS11   | JPKB01001000       | 12749   | 37136   | 24387  | pCHKU35.1-2.2               | pCHKU35.2-2.2  | -             |
| PKS12   | JPJU01000852       | 23274   | 38823   | 15549  | pCHKU36.1-2.2               | pCHKU36.2-2.2  | -             |
| PKS13   | JPJR01000396       | 848     | 19416   | 18568  | pCHKU37.1-2.2               | pCHKU37.2-2.2  | -             |
| PKS14   | KN847553           | 300827  | 326489  | 25662  | pCHKU38.1-2.2               | pCHKU38.2-2.2  | -             |
| PKS15   | AWSO01000045       | 179446  | 203577  | 24131  | pCHKU39.1-2.2               | pCHKU39.2-2.2  | -             |
| PKS16   | JH687542           | 431482  | 465332  | 33850  | pCHKU42.1-2.2               | pCHKU42.2-2.2  | pCHKU42.3-2.2 |
| PKS17   | KN839868           | 143119  | 188013  | 44894  | pCHKU43.1-2.2               | pCHKU43.2-2.2  | pCHKU43.3-2.2 |
| PKS18   | DS989828           | 1389449 | 1407499 | 18050  | pCHSU62.1-2.2               | pCHSU62.2-2.2  | pCHKU62.3-2.2 |
| PKS19   | KB908593           | 409171  | 443069  | 33898  | pCHSU64.1-2.2               | pCHSU64.2-2.2  | -             |
| PKS20   | GL532685           | 4724    | 17845   | 13121  | pCHSU65.1-2.2               | pCHSU65.2-2.2  | -             |
| PKS21   | AMGW01000002       | 1294251 | 1322017 | 27766  | pCHSU67.1-2.2               | pCHSU67.2-2.2  | -             |
| PKS22   | DF933843           | 225991  | 254307  | 28316  | pCHSU68.1-2.2               | pCHSU68.2-2.2  | -             |
| PKS23   | KE720645           | 48853   | 80314   | 31461  | pCHSU70.1-2.2               | pCHSU70.2-2.2  | -             |
| PKS24   | DF933834           | 523551  | 558018  | 34467  | pCHSU71.1-2.2               | pCHSU71.2-2.2  | -             |
| PKS25   | AWSO01000633       | 5071    | 30440   | 25369  | pCHSU72.1-2.2               | pCHSU72.2-2.2  | -             |
| PKS26   | KN817529           | 130968  | 152240  | 21272  | pCHSU73.1-2.2               | pCHSU73.2-2.2  | -             |
| PKS27   | KB445800           | 1362248 | 1403385 | 41137  | pCHSU74.1-2.2               | pCHSU74.2-2.2  | -             |
| PKS28   | AWSO01000632       | 8804    | 37857   | 29053  | pCHSU75.1-2.2               | pCHSU75.2-2.2  | -             |

|      |              |         |         |       |               |                |   |
|------|--------------|---------|---------|-------|---------------|----------------|---|
| TC1  | ABDF02000086 | 384012  | 368868  | 15144 | pCHTV86.1-2.2 | pCHTV86.2-2.2  | - |
| TC2  | ABDF02000083 | 37740   | 49247   | 11507 | pCHTV83.1-2.2 | -              | - |
| TC3  | FQ790293     | 97750   | 131296  | 33546 | pCHBFT4.1-2.2 | pCHBFT4.2-2.2  | - |
| TC4  | JH717969     | 858521  | 869226  | 10705 | pCHKU11.1-2.2 | -              | - |
| TC5  | KI925459     | 2412992 | 2432365 | 19373 | pCHKU12.1-2.2 | pTC_KU12_trans | - |
| TC6  | KB445798     | 581049  | 618823  | 37774 | pCHKU13.1-2.2 | -              | - |
| TC7  | JH719450     | 83620   | 114270  | 30650 | pCHKU15.1-2.2 | -              | - |
| TC8  | KL198014     | 1718438 | 1746540 | 28102 | pCHKU16.1-2.2 | -              | - |
| TC9  | GL377319     | 205808  | 212935  | 7127  | pCHKU17.1-2.2 | -              | - |
| TC10 | JH687394     | 99692   | 114281  | 14589 | pCHKU19.1-2.2 | -              | - |
| TC11 | JH687396     | 33983   | 48346   | 14363 | pCHKU20.1-2.2 | -              | - |
| TC12 | JH719415     | 280135  | 300470  | 20335 | pCHKU21.1-2.2 | -              | - |
| TC13 | JH795868     | 73132   | 97338   | 24206 | pCHKU22.1-2.2 | -              | - |

**table S9. Abbreviations for the functional gene annotations used in Figs. 2, 5, and 6.**

| <b>Abbreviation</b> | <b>Domain Annotation</b>                                           |
|---------------------|--------------------------------------------------------------------|
| A                   | Adenylation domain                                                 |
| a,b-h               | a,b-hydrolase                                                      |
| ABC                 | ATP-binding cassette transporter                                   |
| ACP                 | Acyl carrier protein                                               |
| ADH                 | Alcohol dehydrogenase                                              |
| AK-red              | Aldo-keto reductase                                                |
| AmOx                | Aminooxidase                                                       |
| AmT                 | Aminotransferase                                                   |
| ArST                | Arylsulfotransferase                                               |
| AT                  | Acyltransferase domain                                             |
| cMT                 | C-methyltransferase                                                |
| Cyc                 | Terpene cyclase                                                    |
| DH                  | Dehydratase                                                        |
| DUF4246             | Domain of unknown function 4246                                    |
| FAD                 | Flavin adenine dinucleotide (FAD) binding protein                  |
| Fe-ADH              | Iron dependent alcohol dehydrogenase                               |
| FMO                 | Flavin-dependent monooxygenase                                     |
| GGPPS               | Geranyl-geranyl pyrophosphate synthase                             |
| glycos.             | Glycosidase                                                        |
| GMC                 | Glucose-methanol-choline oxidoreductase                            |
| Halo                | Halogenase                                                         |
| HR-PKS              | Highly reducing polyketide synthase                                |
| Hyp                 | Hypothetical protein                                               |
| IAS                 | Indole-3-acetic acid-amido synthetase                              |
| KS                  | Ketosynthase domain                                                |
| mBla                | metallo-B-lactamase                                                |
| MCP                 | Mitochondrial phosphate carrier protein                            |
| MFS                 | Major facilitator superfamily transporter                          |
| MH                  | Metallohydrolase                                                   |
| MT                  | Methyl transferase                                                 |
| NAD-DH              | Nicotine adenine dinucleotide dependent dehydrogenase              |
| NADP-R              | Nicotine adenine dinucleotide phosphate (NADP) dependent reductase |
| nMT                 | N-methyltransferase                                                |
| NR-PKS              | Non reducing polyketide synthase                                   |
| O-suc-SH            | O-succinylhomoserine sulfhydrylase                                 |
| oMT                 | O-methyltransferase                                                |
| OxR                 | Oxidoreductase                                                     |
| p450                | Cytochrome p450                                                    |

|      |                                      |
|------|--------------------------------------|
| Pep  | Dipeptidyl peptidase                 |
| PrT  | Prenyl transferase                   |
| PT   | Product template domain              |
| RibD | Riboflavin biosynthesis protein RibD |
| RNAh | RNA helicase                         |
| SAT  | starter unit:ACP transacylase domain |
| SDH  | Short-chain dehydrogenase            |
| SDR  | Short-chain dehydrogenase/reductase  |
| SH   | Serine hydrolase                     |
| ST   | Sugar transport protein              |
| T    | Thiolation domain                    |
| TD   | Terminal domain                      |
| TE   | Thioesterase domain                  |
| TF   | Transcription factor                 |
| UTC  | UbiA-type terpene cyclase            |

**table S10. Strains expressing cryptic fungal BGCs analyzed here.**

| Strain Number | Mating    | Background | Cluster | Plasmid        |                |   |
|---------------|-----------|------------|---------|----------------|----------------|---|
|               |           |            |         | 1              | 2              | 3 |
| 106           | -         | JHY692     | NC      | pRS426         | -              | - |
| 107           | -         | JHY705     | NC      | pCHINT2AL      | -              | - |
| 108           | -         | JHY705     | NC      | pRS426         | -              | - |
| 137           | 105 x 108 | JHY702     | NC      | pRS426         | pCHINT2AL      | - |
| 290           | 266 x 108 | JHY702     | DHZ     | pCHDHZ-2.2     | pRS426         | - |
| 304           | -         | JHY692     | DHZ     | pCHDHZ-2c      | -              | - |
| 305           | 304 X 108 | JHY702     | DHZ     | pCHDHZ-2c      | pRS426         | - |
| 266           | -         | JHY692     | DHZ     | pCHDHZ-2.2     | -              | - |
| 286           | 182 x 107 | JHY702     | IDT     | pCHIDT-2.2     | pCHINT2AL      | - |
| 287           | 183 x 107 | JHY702     | IDT     | pCHIDT-2c      | pCHINT2AL      | - |
| 95            | -         | JHY692     | PKS01   | pCHCS100.1-2.1 | -              | - |
| 100           | -         | JHY705     | PKS01   | pCHCS100.2-2.1 | -              | - |
| 132           | 95 x 100  | JHY702     | PKS01   | pCHCS100.1-2.1 | pCHCS100.2-2.1 | - |
| 96            | -         | JHY692     | PKS02   | pCHCS163.1-2.1 | -              | - |
| 101           | -         | JHY705     | PKS02   | pCHCS163.2-2.1 | -              | - |
| 133           | 96 x 101  | JHY702     | PKS02   | pCHCS163.1-2.1 | pCHCS163.2-2.1 | - |
| 97            | -         | JHY692     | PKS03   | pCHAK200.1-2.1 | -              | - |
| 102           | -         | JHY705     | PKS03   | pCHAK200.2-2.1 | -              | - |
| 134           | 97 x 102  | JHY702     | PKS03   | pCHAK200.1-2.1 | pCHAK200.2-2.1 | - |
| 124           | -         | JHY692     | PKS04   | pCHKU27.1-2.2  | -              | - |
| 248           | -         | JHY705     | PKS04   | pCHKU27.2-2.2  | -              | - |
| 255           | 124 x 248 | JHY702     | PKS04   | pCHKU27.1-2.2  | pCHKU27.2-2.2  | - |
| 117           | -         | JHY692     | PKS05   | pCHKU28.1-2.2  | -              | - |
| 249           | -         | JHY705     | PKS05   | pCHKU28.2-2.2  | -              | - |
| 256           | 117 x 249 | JHY702     | PKS05   | pCHKU28.1-2.2  | pCHKU28.2-2.2  | - |
| 118           | -         | JHY692     | PKS06   | pCHKU30.1-2.2  | -              | - |
| 171           | -         | JHY705     | PKS06   | pCHKU30.2-2.2  | -              | - |
| 178           | 118 x 171 | JHY702     | PKS06   | pCHKU30.1-2.2  | pCHKU30.2-2.2  | - |
| 110           | -         | JHY705     | PKS07   | pCHKU31.2-2.2  | -              | - |
| 125           | -         | JHY692     | PKS07   | pCHKU31.1-2.2  | -              | - |
| 163           | 110 x 125 | JHY702     | PKS07   | pCHKU31.1-2.2  | pCHKU31.2-2.2  | - |
| 111           | -         | JHY705     | PKS08   | pCHKU32.2-2.2  | -              | - |
| 126           | -         | JHY692     | PKS08   | pCHKU32.1-2.2  | -              | - |
| 164           | 111 x 126 | JHY702     | PKS08   | pCHKU32.2-2.2  | pCHKU32.2-2.2  | - |
| 112           | -         | JHY705     | PKS09   | pCHKU33.2-2.2  | -              | - |

|     |           |        |       |               |               |               |
|-----|-----------|--------|-------|---------------|---------------|---------------|
| 114 | -         | JHY692 | PKS09 | pCHKU33.1-2.2 | -             | -             |
| 165 | 112 x 114 | JHY702 | PKS09 | pCHKU33.1-2.2 | pCHKU33.2-2.2 | -             |
| 242 | -         | JHY692 | PKS10 | pCHKU34.1-2.2 | -             | -             |
| 243 | -         | JHY705 | PKS10 | pCHKU34.2-2.2 | -             | -             |
| 246 | 242 x 243 | JHY702 | PKS10 | pCHKU34.1-2.2 | pCHKU34.2-2.2 | -             |
| 115 | -         | JHY692 | PKS11 | pCHKU35.1-2.2 | -             | -             |
| 191 | -         | JHY705 | PKS11 | pCHKU35.2-2.2 | -             | -             |
| 205 | 191 x 115 | JHY702 | PKS11 | pCHKU35.1-2.2 | pCHKU35.2-2.2 | -             |
| 113 | -         | JHY705 | PKS12 | pCHKU36.2-2.2 | -             | -             |
| 127 | -         | JHY692 | PKS12 | pCHKU36.1-2.2 | -             | -             |
| 166 | 113 x 117 | JHY702 | PKS12 | pCHKU36.1-2.2 | pCHKU36.2-2.2 | -             |
| 128 | -         | JHY692 | PKS13 | pCHKU37.1-2.2 | -             | -             |
| 192 | -         | JHY705 | PKS13 | pCHKU37.2-2.2 | -             | -             |
| 206 | 192 x 128 | JHY702 | PKS13 | pCHKU37.1-2.2 | pCHKU37.2-2.2 | -             |
| 167 | -         | JHY692 | PKS14 | pCHKU38.1-2.2 | -             | -             |
| 250 | -         | JHY705 | PKS14 | pCHKU38.2-2.2 | -             | -             |
| 257 | 167 x 250 | JHY702 | PKS14 | pCHKU38.1-2.2 | pCHKU38.2-2.2 | -             |
| 228 | -         | JHY692 | PKS15 | pCHKU39.1-2.2 | -             | -             |
| 244 | -         | JHY705 | PKS15 | pCHKU39.2-2.2 | -             | -             |
| 247 | 244 x 228 | JHY702 | PKS15 | pCHKU39.1-2.2 | pCHKU39.2-2.2 | -             |
| 122 | -         | JHY692 | PKS16 | pCHKU42.1-2.2 | -             | -             |
| 172 | -         | JHY705 | PKS16 | pCHKU42.2-2.2 | -             | -             |
| 177 | 172 x 122 | JHY702 | PKS16 | pCHKU42.1-2.2 | pCHKU42.2-2.2 | pCHKU42.3-2.2 |
| 121 | -         | JHY705 | PKS17 | pCHKU43.2-2.2 | -             | -             |
| 168 | -         | JHY692 | PKS17 | pCHKU43.1-2.2 | -             | -             |
| 176 | 168 x 121 | JHY702 | PKS17 | pCHKU43.1-2.2 | pCHKU43.2-2.2 | pCHKU43.3-2.2 |
| 185 | -         | JHY692 | PKS18 | pCHSU62.1-2.2 | -             | -             |
| 193 | -         | JHY705 | PKS18 | pCHSU62.2-2.2 | -             | -             |
| 207 | 193 x 185 | JHY702 | PKS18 | pCHSU62.1-2.2 | pCHSU62.2-2.2 | -             |
| 158 | -         | JHY692 | PKS19 | pCHSU64.1-2.2 | -             | -             |
| 252 | -         | JHY705 | PKS19 | pCHSU64.2-2.2 | -             | -             |
| 259 | 158 x 252 | JHY702 | PKS19 | pCHSU64.1-2.2 | pCHSU64.2-2.2 | -             |
| 187 | -         | JHY692 | PKS20 | pCHSU65.1-2.2 | -             | -             |
| 194 | -         | JHY705 | PKS20 | pCHSU65.2-2.2 | -             | -             |
| 208 | 194 x 187 | JHY702 | PKS20 | pCHSU65.1-2.2 | pCHSU65.2-2.2 | -             |
| 188 | -         | JHY692 | PKS21 | pCHSU67.1-2.2 | -             | -             |
| 253 | -         | JHY705 | PKS21 | pCHSU67.2-2.2 | -             | -             |
| 260 | 188 x 253 | JHY702 | PKS21 | pCHSU67.1-2.2 | pCHSU67.2-2.2 | -             |

|     |           |        |                   |               |                |   |
|-----|-----------|--------|-------------------|---------------|----------------|---|
| 189 | -         | JHY692 | PKS22             | pCHSU68.1-2.2 | -              | - |
| 195 | -         | JHY705 | PKS22             | pCHSU68.2-2.2 | -              | - |
| 209 | 195 x 189 | JHY702 | PKS22             | pCHSU68.1-2.2 | pCHSU68.2-2.2  | - |
| 173 | -         | JHY692 | PKS23             | pCHSU70.1-2.2 | -              | - |
| 229 | -         | JHY705 | PKS23             | pCHSU70.2-2.2 | -              | - |
| 241 | 173 x 229 | JHY702 | PKS23             | pCHSU70.1-2.2 | pCHSU70.2-2.2  | - |
| 174 | -         | JHY692 | PKS24             | pCHSU71.1-2.2 | -              | - |
| 196 | -         | JHY705 | PKS24             | pCHSU71.2-2.2 | -              | - |
| 210 | 196 x 174 | JHY702 | PKS24             | pCHSU71.1-2.2 | pCHSU71.2-2.2  | - |
| 160 | -         | JHY692 | PKS25             | pCHSU72.1-2.2 | -              | - |
| 197 | -         | JHY705 | PKS25             | pCHSU72.2-2.2 | -              | - |
| 211 | 197 x 160 | JHY702 | PKS25             | pCHSU72.1-2.2 | pCHSU72.2-2.2  | - |
| 175 | -         | JHY692 | PKS26             | pCHSU73.1-2.2 | -              | - |
| 198 | -         | JHY705 | PKS26             | pCHSU73.2-2.2 | -              | - |
| 212 | 198 x 175 | JHY702 | PKS26             | pCHSU73.1-2.2 | pCHSU73.2-2.2  | - |
| 162 | -         | JHY692 | PKS27             | pCHSU74.1-2.2 | -              | - |
| 199 | -         | JHY705 | PKS27             | pCHSU74.2-2.2 | -              | - |
| 213 | 199 x 162 | JHY702 | PKS27             | pCHSU74.1-2.2 | pCHSU74.2-2.2  | - |
| 230 | -         | JHY692 | PKS28             | pCHSU75.1-2.2 | -              | - |
| 231 | -         | JHY705 | PKS28             | pCHSU75.2-2.2 | -              | - |
| 240 | 231 x 230 | JHY702 | PKS28             | pCHSU75.1-2.2 | pCHSU75.2-2.2  | - |
| 226 | -         | JHY705 | TC01              | pCHTV86.1-2.2 | -              | - |
| 278 | -         | JHY705 | TC01              | pCHTV86.1-1.0 | -              | - |
| 280 | -         | JHY705 | TC01              | pCHTV86.1-2.1 | -              | - |
| 282 | -         | JHY692 | TC01              | pCHTV86.2-1.0 | -              | - |
| 283 | -         | JHY692 | TC01              | pCHTV86.2-2.1 | -              | - |
| 292 | 280 x 283 | JHY702 | TC01              | pCHTV86.1-2.1 | pCHTV86.2-2.1  | - |
| 293 | 278 x 282 | JHY702 | TC01              | pCHTV86.1-1.0 | pCHTV86.2-1.0  | - |
| 227 | -         | JHY705 | TC03              | pCHBFT4.1-2.1 | -              | - |
| 279 | -         | JHY705 | TC03              | pCHBFT4.1-1.0 | -              | - |
| 281 | -         | JHY705 | TC03              | pCHBFT4.1-2.1 | -              | - |
| 284 | -         | JHY692 | TC03              | pCHBFT4.2-2.1 | -              | - |
| 288 | 106 x 279 | JHY702 | TC03              | pCHBFT4.1-1.0 | pRS426         | - |
| 289 | 106 x 281 | JHY702 | TC03              | pCHBFT4.1-2.1 | pRS426         | - |
| 291 | 281 x 284 | JHY702 | TC03              | pCHBFT4.1-2.1 | pCHBFT4.2-2.1  | - |
| 217 | -         | JHY705 | TC04              | pCHKU11.1-2.2 | -              | - |
| 269 | -         | JHY705 | TC05<br>Corrected | pCHKU12-2.2   | pTC-KU12_Trans | - |
| 218 | -         | JHY705 | TC05<br>Deposited | pCHKU12-2.2   | -              | - |



|     |   |        |      |               |   |   |
|-----|---|--------|------|---------------|---|---|
| 219 | - | JHY705 | TC06 | pCHKU13.1-2.2 | - | - |
| 220 | - | JHY705 | TC07 | pCHKU15.1-2.2 | - | - |
| 271 | - | JHY705 | TC08 | pCHKU16.1-2.2 | - | - |
| 221 | - | JHY705 | TC09 | pCHKU17-2.2   | - | - |
| 222 | - | JHY705 | TC10 | pCHKU19-2.2   | - | - |
| 223 | - | JHY705 | TC11 | pCHKU20-2.2   | - | - |
| 224 | - | JHY705 | TC12 | pCHKU21-2.2   | - | - |
| 225 | - | JHY705 | TC13 | pCHKU22.1-2.2 | - | - |

## Compound Characterization Data:

### LC-MS Data:

#### Strain 132 - PKS1 - *Corniothyrium sporulosum*

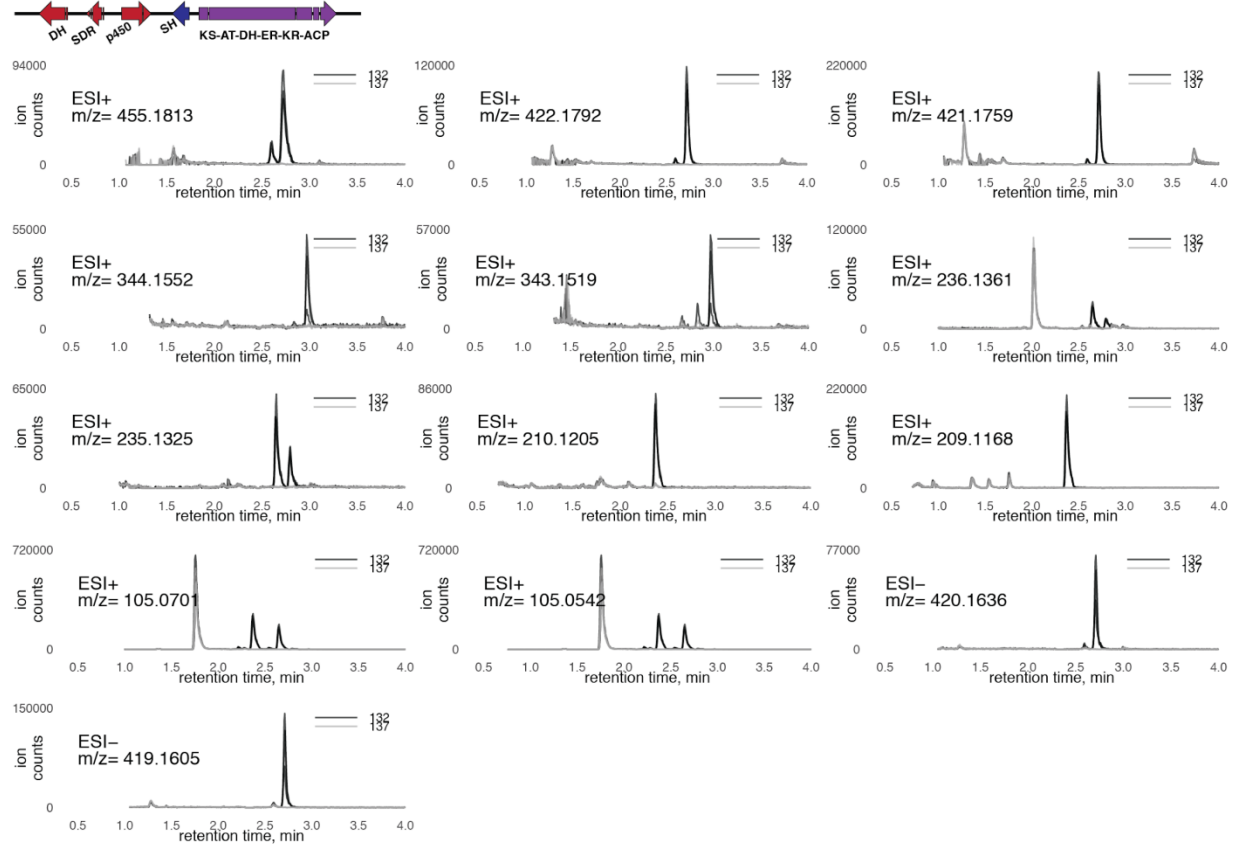

fig. S8. All features produced by PKS1 in strain 132.

**Strain 133 - PKS2 - *Corniothyrium sporulosum***

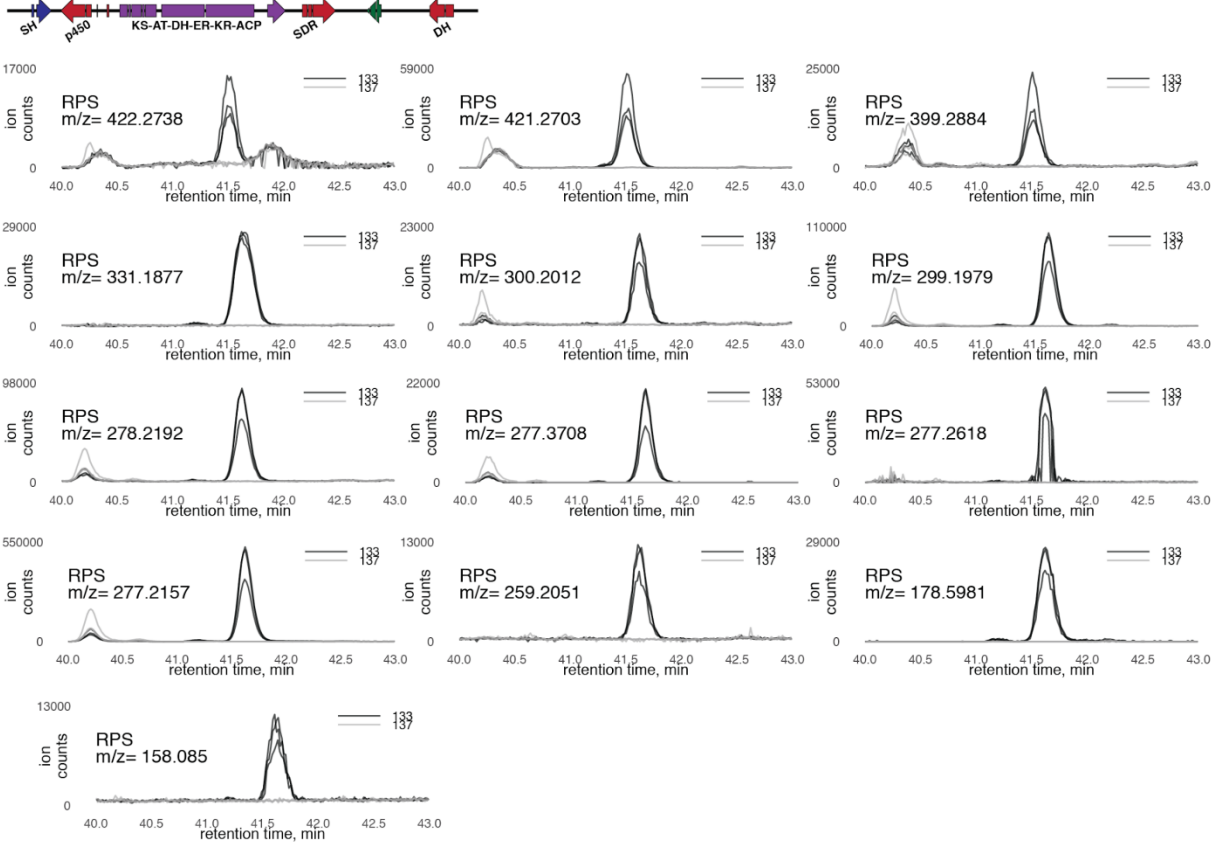

**fig. S9. All features produced by PKS2 in strain 133.**

**Strain 255 - PKS4 - *Aspergillus niger***

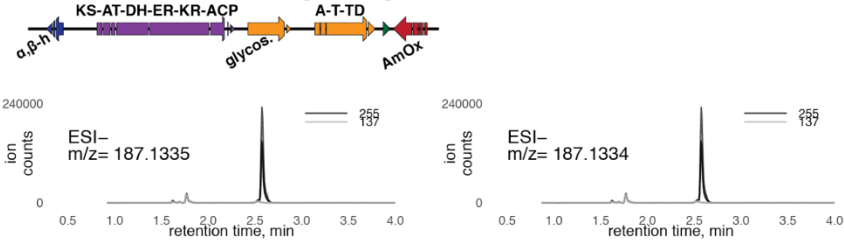

**fig. S10. All features produced by PKS4 in strain 255.**

**Strain 178 - PKS6 - *Trichoderma virens***

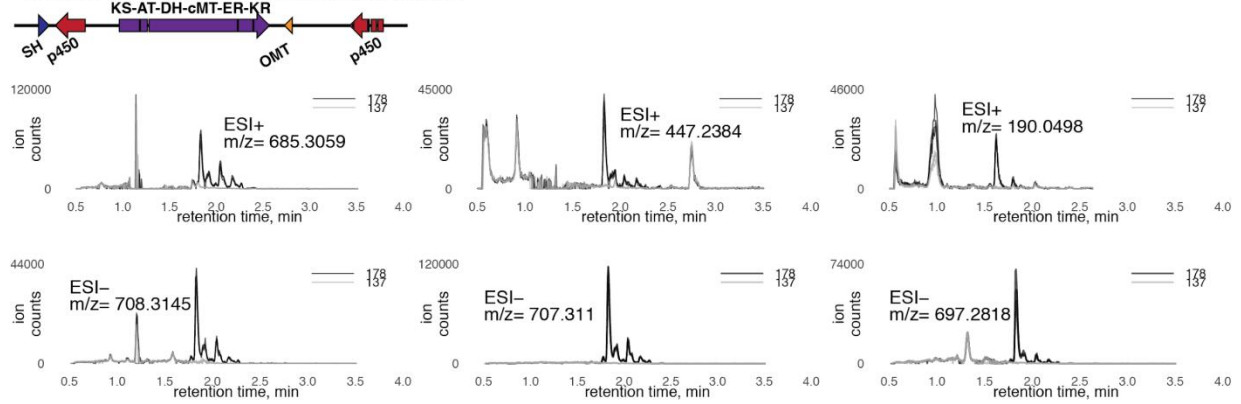

**fig. S11. All features produced by PKS6 in strain 178.**

**Strain 164 - PKS8 - *Scedosporium apiospermum***

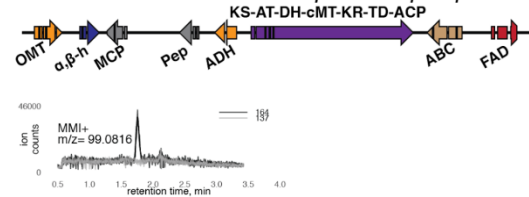

**fig. S12. All features produced by PKS8 in strain 164.**

**Strain 246 - PKS10 - *Cochliobolus heterostrophus***

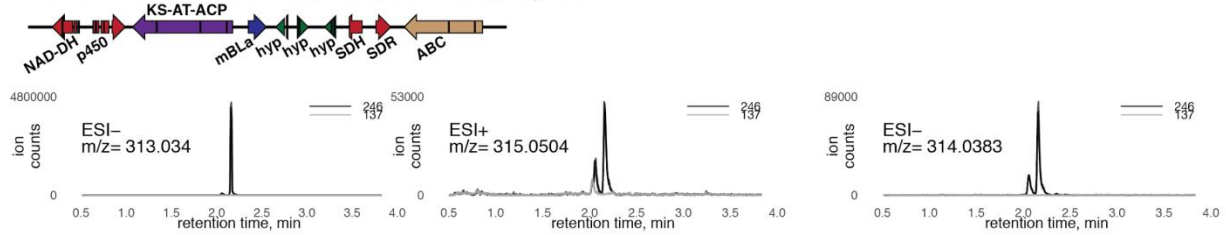

**fig. S13. All features produced by PKS10 in strain 246.**

**Strain 206 - PKS13 - *Pseudogymnoascus pannorum***

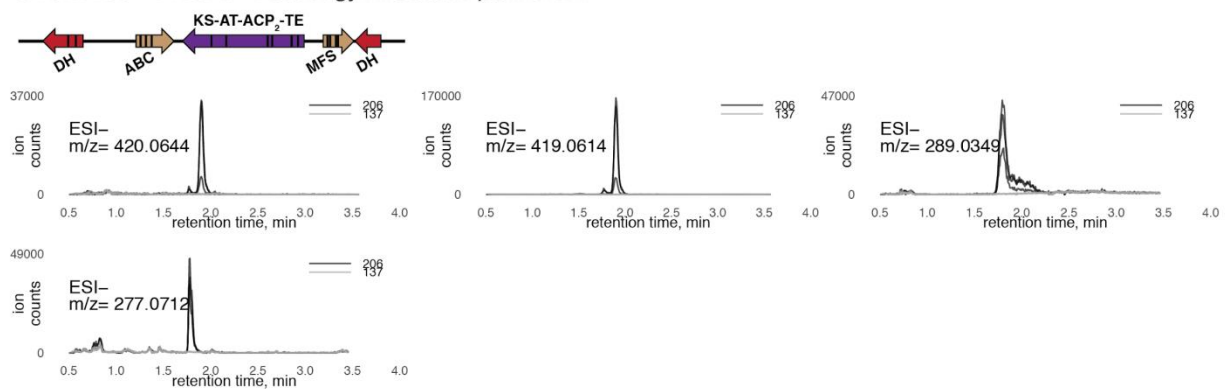

**fig. S14. All features produced by PKS13 in strain 206.**

Strain 257 - PKS14 - *Verruconis gallopava*

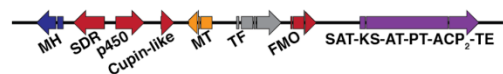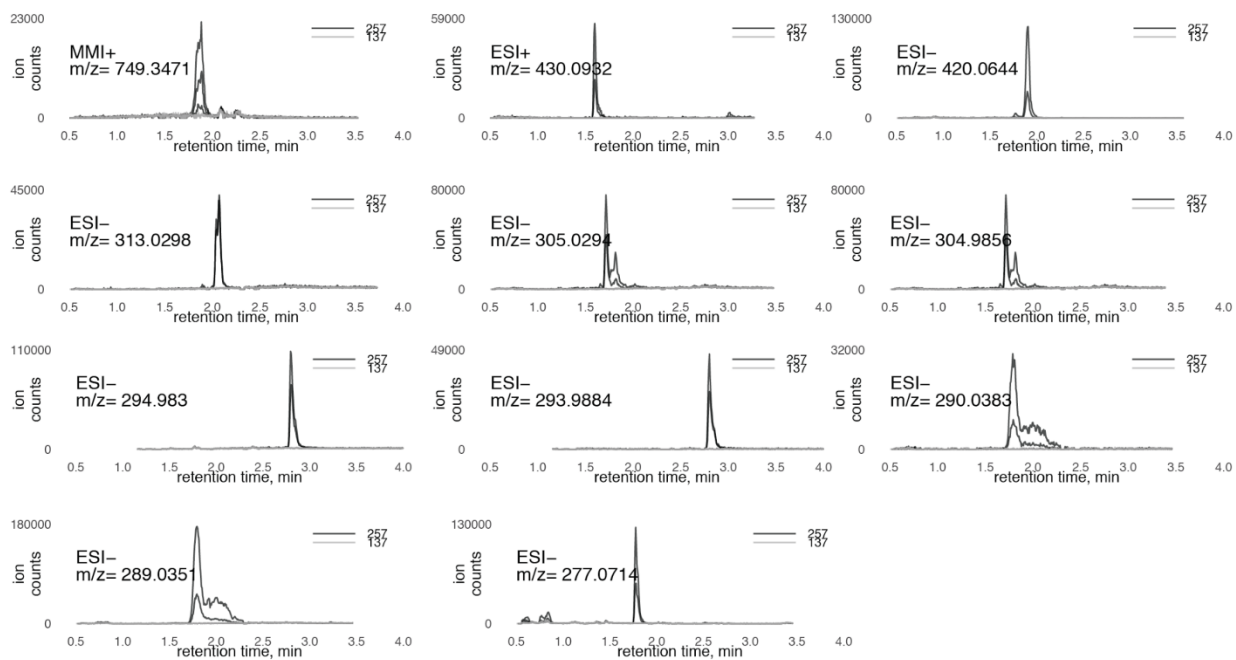

fig. S15. All features produced by PKS14 in strain 257.

Strain 247 - PKS15 - *Moniliophthora roreri*

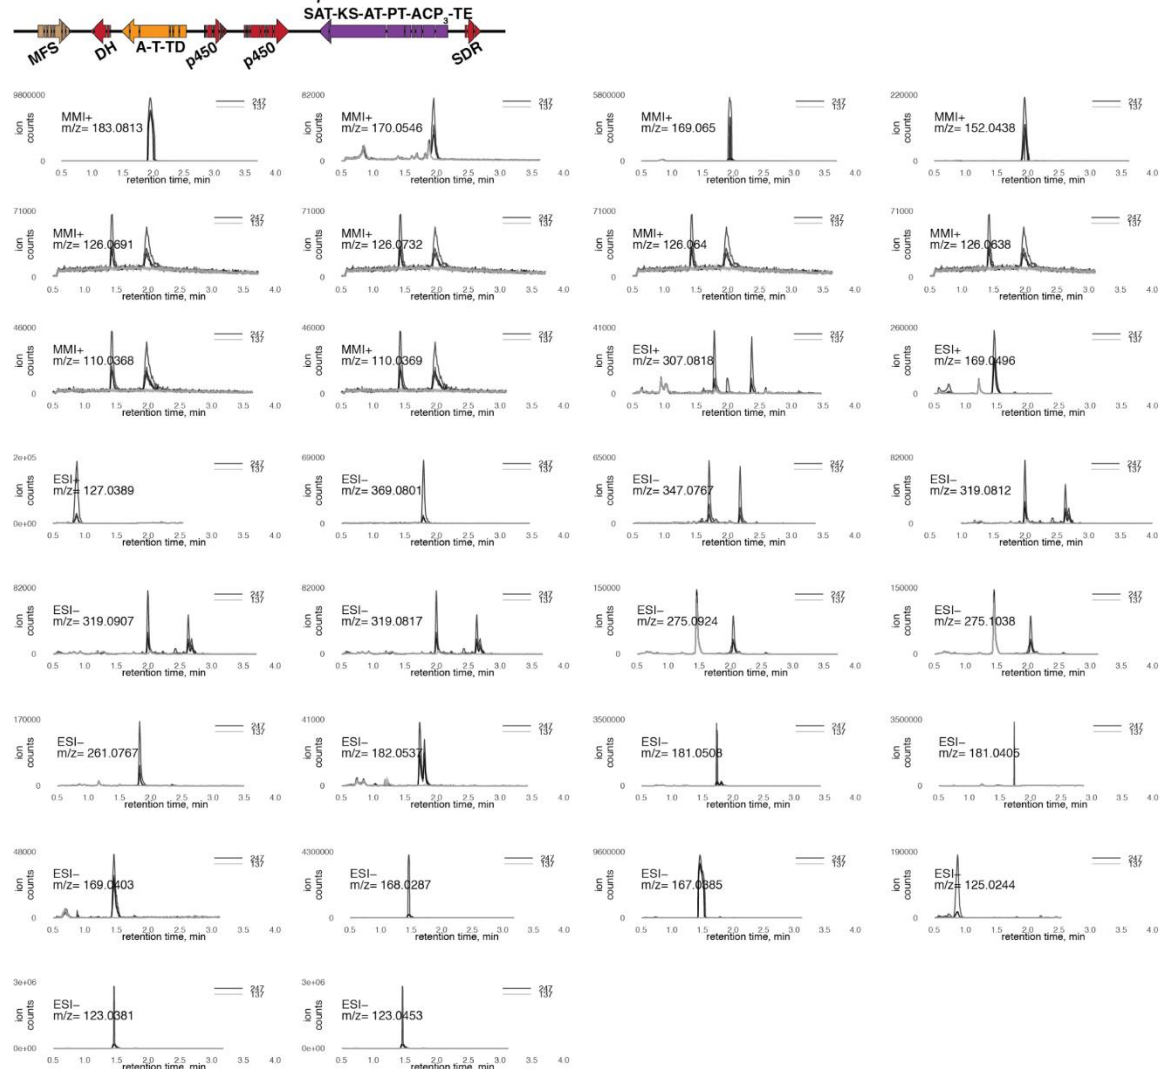

fig. S16. All features produced by PKS15 in strain 247.

Strain 177 - PKS16 - *Puntularia strigosonata*

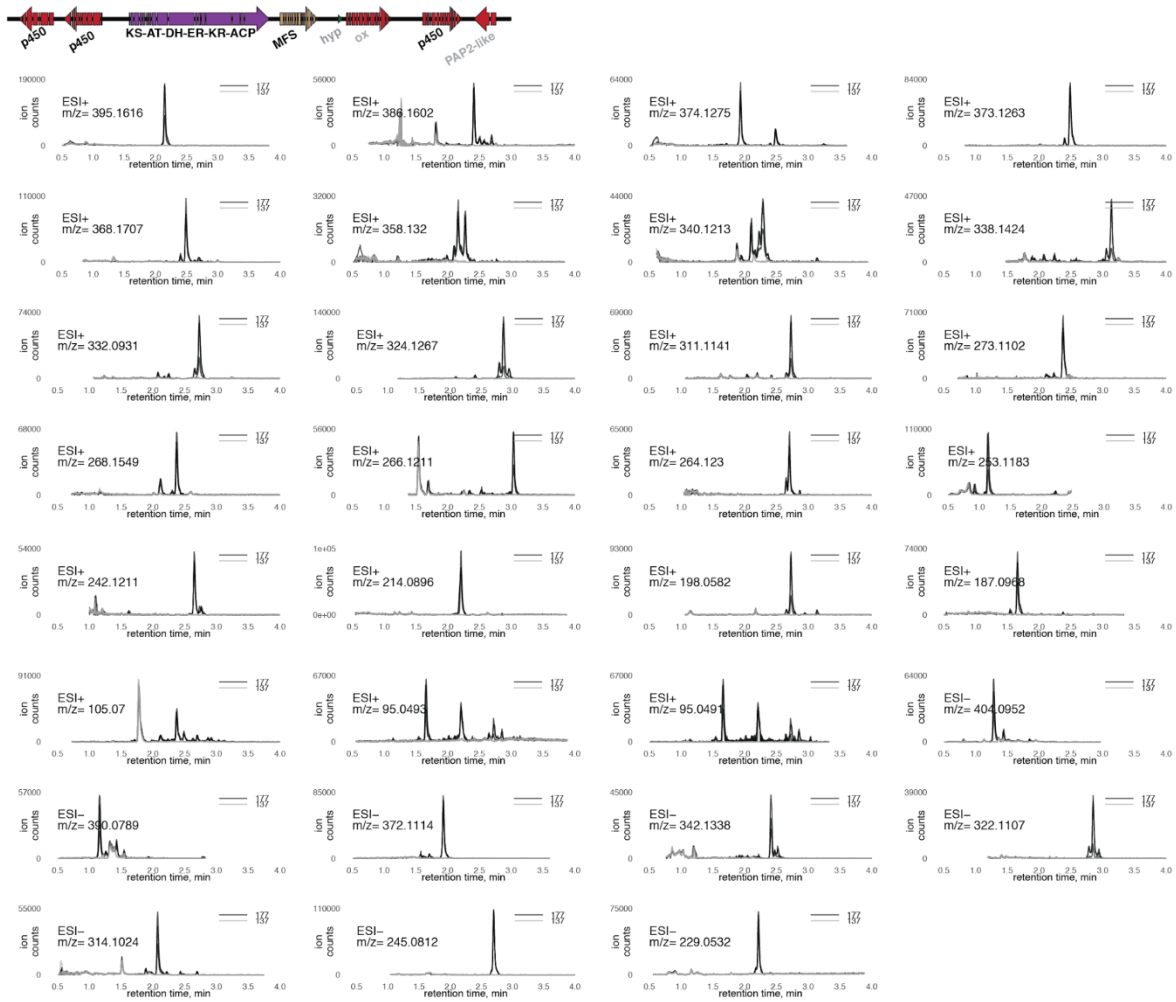

fig. S17. All features produced by PKS16 in strain 177.

**Strain 176 - PKS17 - *Hydnomerulius pinastri***

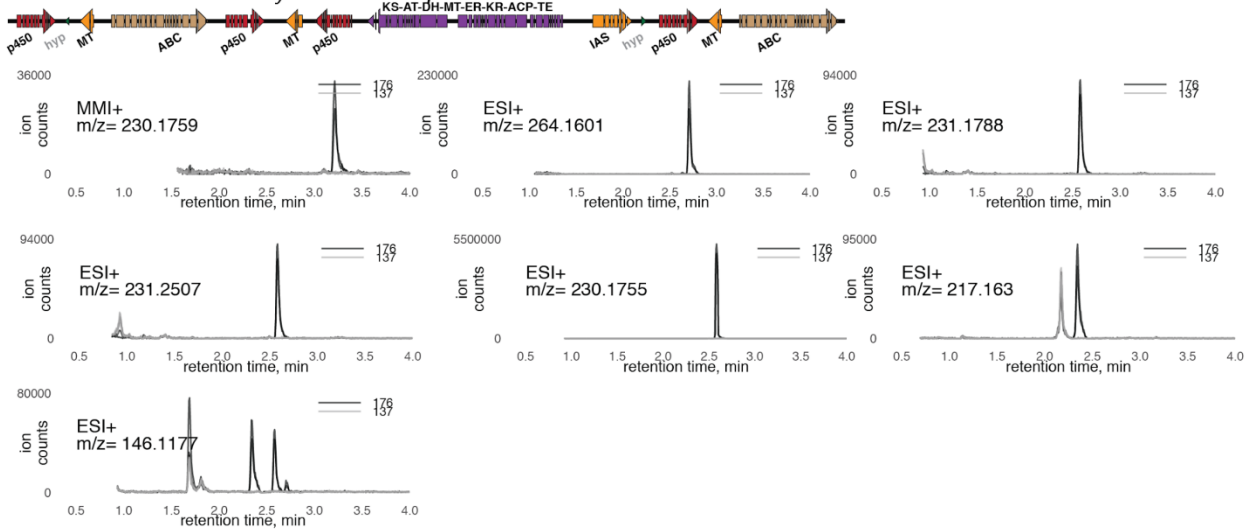

**fig. S18. All features produced by PKS17 in strain 176.**

**Strain 207 - PKS18 - *Arthroderma gypseum***

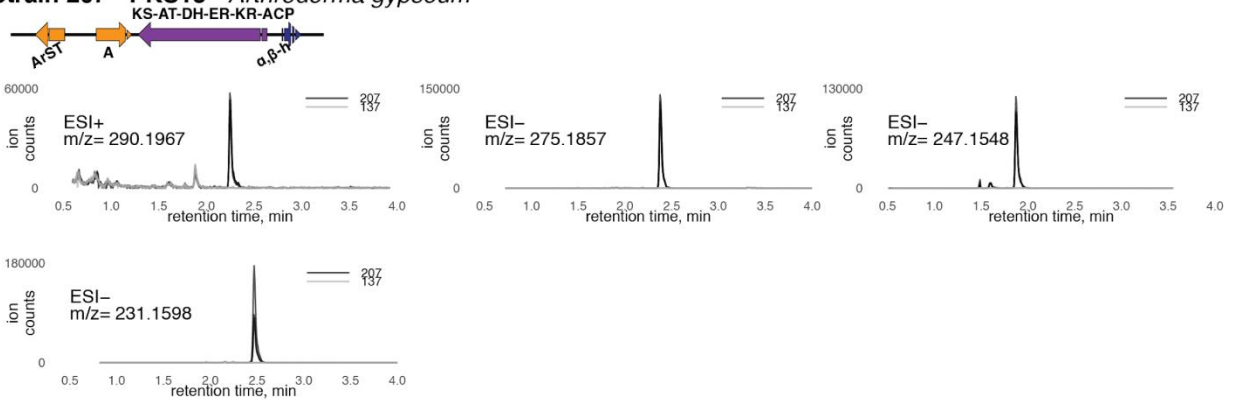

**fig. S19. All features produced by PKS18 in strain 207.**



**Strain 208 - PKS20 - *Pyrenophora teres***

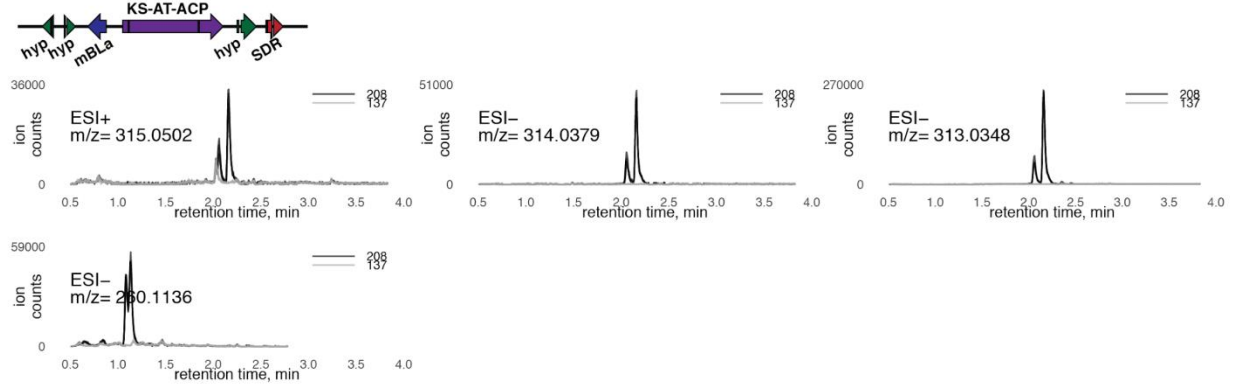

**fig. S20. All features produced by PKS20 in strain 208.**

**Strain 209 - PKS22 - *Talaromyces cellulolyticus***

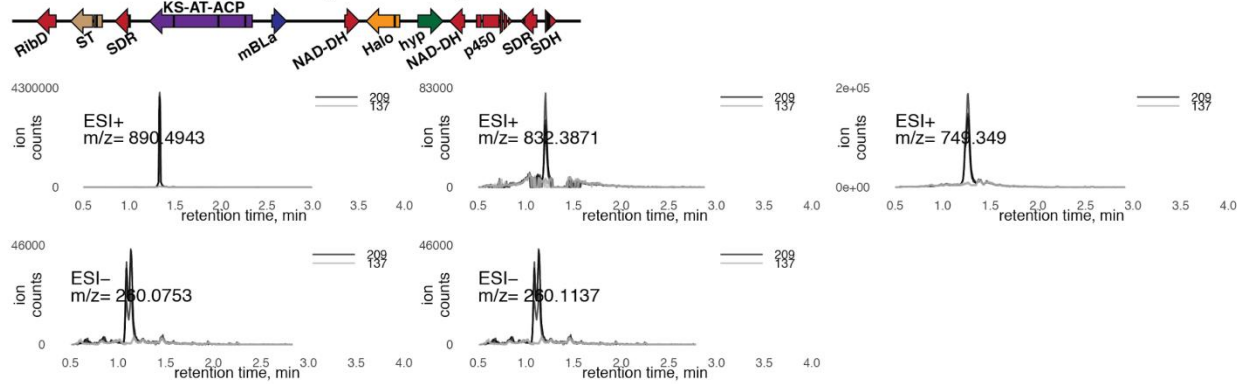

**fig. S21. All features produced by PKS22 in strain 209.**

Strain 241 - PKS23 - *Endocarpon pusillum*

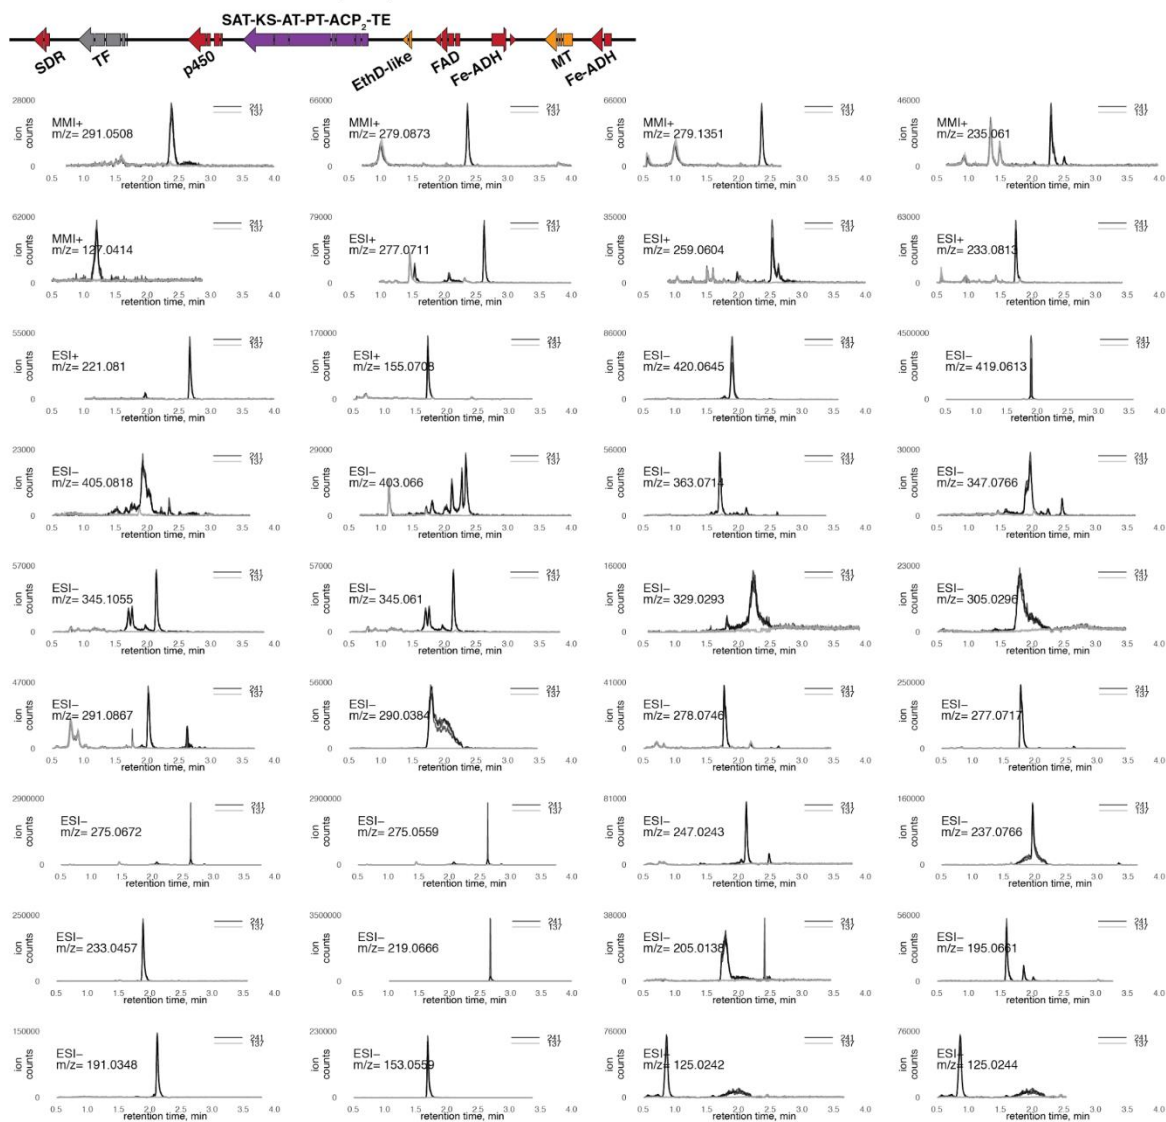

fig. S22. All features produced by PKS23 in strain 241.

**Strain 210 - PKS24 - *Talaromyces cellulolyticus***

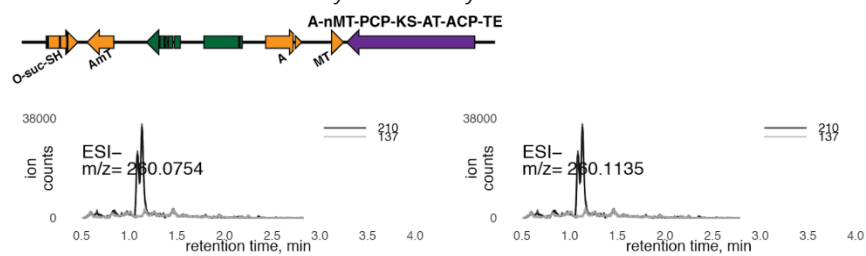

**fig. S23. All features produced by PKS24 in strain 210.**

**Strain 240 - PKS28 - *Moniliophthora roreri***

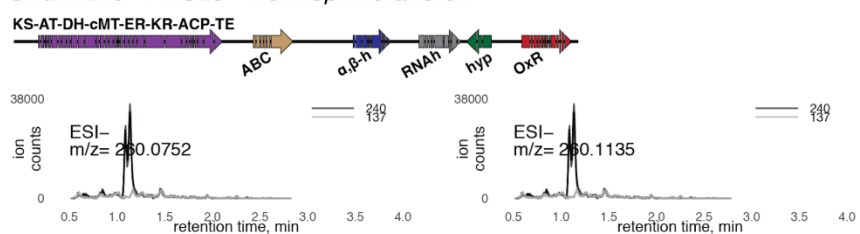

**fig. S24. All features produced by PKS28 in strain 240.**

## NMR Data:

table S11. NMR data of compound 6.

$^1\text{H}$  NMR spectrum (500 MHz),  $^{13}\text{C}$  NMR spectrum (125 MHz),  $\text{CDCl}_3$

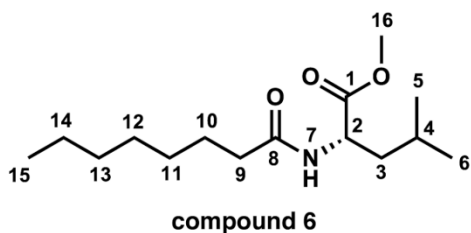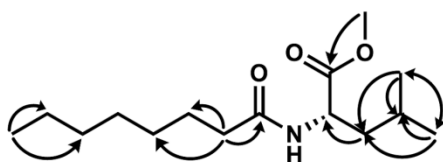

| position       | $\delta_{\text{H}}$ , mult ( $J$ in Hz) | $\delta_{\text{C}}$ | COSY   |
|----------------|-----------------------------------------|---------------------|--------|
| 1              |                                         | 173.92              |        |
| 2              | 4.66, td (4.9, 8.8)                     | 50.65               | H3, H7 |
| 3              | 1.51, m, overlap<br>1.64, m, overlap    | 41.98               | H2, H4 |
| 4              | 1.64, m, overlap                        | 25.04               |        |
| 5 <sup>a</sup> | 0.94, m, overlap                        | 22.96               | H4     |
| 6 <sup>a</sup> | 0.94, m, overlap                        | 22.14               | H4     |
| 7-NH           | 5.76, d (8.5)                           |                     | H2     |
| 8              |                                         | 173.02              |        |
| 9              | 2.21, m                                 | 36.77               | H8     |
| 10             | 1.64, m, overlap                        | 25.73               | H9     |
| 11             | 1.28, m, overlap                        | 29.32               |        |
| 12             | 1.28, m, overlap                        | 29.13               |        |
| 13             | 1.28, m, overlap                        | 31.83               |        |
| 14             | 1.28, m, overlap                        | 22.75               |        |
| 15             | 0.88, t (7.2)                           | 14.22               | H14    |
| 16             | 3.73, s                                 | 52.42               |        |

Note: <sup>a</sup> Assignments denoted by superscript letters are interchangeable.

table S12. NMR data of compound 7.

$^1\text{H}$  NMR spectrum (500 MHz),  $^{13}\text{C}$  NMR spectrum (125 MHz), Acetone- $d_6$

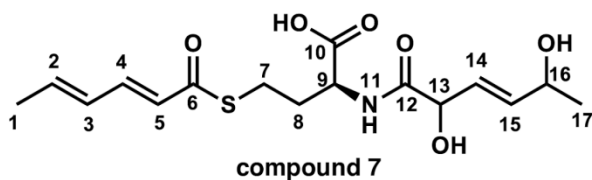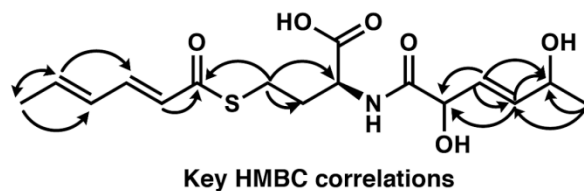

| position | $\delta_{\text{H}}$ , mult ( $J$ in Hz) | $\delta_{\text{C}}$ | COSY     |
|----------|-----------------------------------------|---------------------|----------|
| 1        | 1.87, d (6.2)                           | 18.85               | H2       |
| 2        | 6.26, m                                 | 143.36              | H1, H3   |
| 3        | 7.35, m                                 | 129.90              | H2, H4   |
| 4        | 6.45, t (11.2)                          | 142.64              | H3, H5   |
| 5        | 5.88, d (11.2)                          | 122.27              | H4       |
| 6        |                                         | 188.99              |          |
| 7        | 2.99, m                                 | 25.86               | H8       |
| 8        | 2.08, m<br>2.19, m                      | 33.12               | H7, H11  |
| 9        | 4.59, m, overlap                        | 51.89               | H11      |
| 10       |                                         | 172.86              |          |
| 11-NH    | 7.58, d (7.2)                           |                     | H9       |
| 12       |                                         | 173.11              |          |
| 13       | 4.59, m, overlap                        | 72.71               | H14      |
| 14       | 5.80, m                                 | 127.68              | H13, H14 |
| 15       | 5.91, m                                 | 137.57              | H14, H16 |
| 16       | 4.26, m                                 | 67.72               | H15, H17 |
| 17       | 1.17, d (6.4)                           | 23.95               | H16      |

**table S13. NMR data of compound 8.**

$^1\text{H}$  NMR spectrum (500 MHz),  $^{13}\text{C}$  NMR spectrum (125 MHz), Acetone- $d_6$

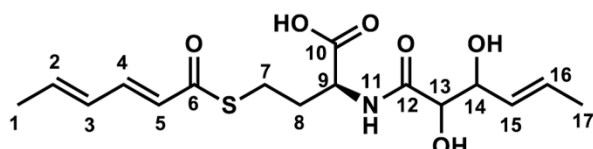

**compound 8**

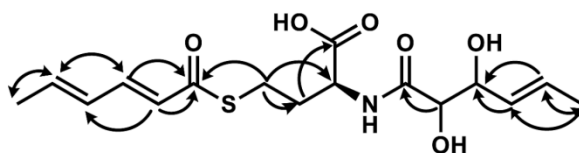

**Key HMBC correlations**

| position | $\delta_{\text{H}}$ , mult (J in Hz) | $\delta_{\text{C}}$ | COSY     |
|----------|--------------------------------------|---------------------|----------|
| 1        | 1.86, dd (7.0, 1.7)                  | 18.84               | H2       |
| 2        | 6.26, m                              | 143.35              | H1, H3   |
| 3        | 7.35, m                              | 129.90              | H2, H4   |
| 4        | 6.45, t (11.2)                       | 142.63              | H3, H5   |
| 5        | 5.89, dd (11.2, 0.85)                | 122.27              | H4       |
| 6        |                                      | 188.97              |          |
| 7        | 3.01, m                              | 25.89               | H8       |
| 8        | 2.09, m<br>2.19, m                   | 33.03               | H7, H11  |
| 9        | 4.60, m                              | 52.03               | H11      |
| 10       |                                      | 172.89              |          |
| 11-NH    | 7.64, d (8.1)                        |                     | H9       |
| 12       |                                      | 173.38              |          |
| 13       | 4.06, d (3.6)                        | 74.89               | H14      |
| 14       | 4.34, m                              | 73.73               | H13, H14 |
| 15       | 5.61, m                              | 131.40              | H14, H16 |
| 16       | 5.75, m                              | 127.51              | H15, H17 |
| 17       | 1.66, dt (6.5, 1.4)                  | 17.95               | H16      |

**table S14. NMR data of compound 9.**

$^1\text{H}$  NMR spectrum (500 MHz),  $^{13}\text{C}$  NMR spectrum (125 MHz),  $\text{CDCl}_3$

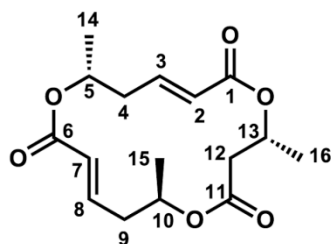

**compound 9**

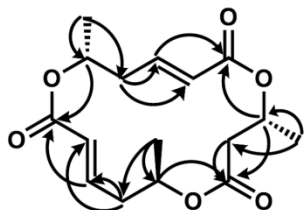

**Key HMBC correlations**

| position | $\delta_{\text{H}}$ , mult (J in Hz)          | $\delta_{\text{C}}$ | COSY     |
|----------|-----------------------------------------------|---------------------|----------|
| 1        |                                               | 165.07              |          |
| 2        | 5.80, m                                       | 125.02              | H3       |
| 3        | 6.84, m, overlap                              | 143.61              | H2, H4   |
| 4        | 2.31, m<br>2.49, m                            | 38.99               | H3, H5   |
| 5        | 5.05, m                                       | 68.72               | H4, H14  |
| 6        |                                               | 165.46              |          |
| 7        | 5.77, m                                       | 123.84              | H8       |
| 8        | 6.80, m, overlap                              | 144.69              | H7, H9   |
| 9        | 2.39, m                                       | 39.50               | H8, H10  |
| 10       | 5.11, m                                       | 70.21               | H9, H15  |
| 11       |                                               | 170.30              |          |
| 12       | 2.47, dd (15.3, 2.3)<br>2.57, dd (15.3, 10.6) | 41.63               | H13      |
| 13       | 5.35, m                                       | 67.81               | H12, H16 |
| 14       | 1.34, d (6.3)                                 | 21.16               | H5       |
| 15       | 1.27, d (6.3)                                 | 20.68               | H10      |
| 16       | 1.30, d (6.3)                                 | 20.21               | H13      |

**table S15. NMR data of compound 10.**

$^1\text{H}$  NMR spectrum (500 MHz),  $^{13}\text{C}$  NMR spectrum (125 MHz),  $\text{CDCl}_3$

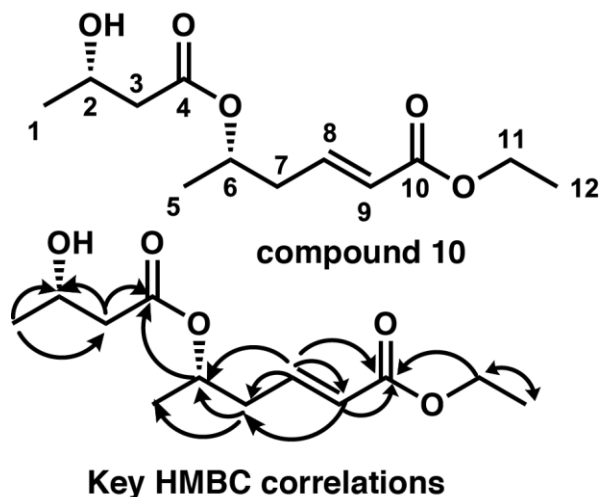

| position | $\delta_{\text{H}}$ , mult ( $J$ in Hz) | $\delta_{\text{C}}$ | COSY   |
|----------|-----------------------------------------|---------------------|--------|
| 1        | 1.22, d (6.3)                           | 22.56               | H2     |
| 2        | 4.19, m, overlap                        | 64.41               | H1, H3 |
| 3        | 2.45, m, overlap                        | 43.70               | H2     |
| 4        |                                         | 172.48              |        |
| 5        | 1.28, m, overlap                        | 19.81               | H6     |
| 6        | 5.07, m                                 | 69.71               | H5, H7 |
| 7        | 2.45, m, overlap                        | 38.48               | H6, H8 |
| 8        | 6.86, dt (15.5, 7.4)                    | 143.31              | H7, H9 |
| 9        | 5.87, dt (15.5, 1.4)                    | 124.51              | H8     |
| 10       |                                         | 166.27              |        |
| 11       | 4.19, m, overlap                        | 60.55               | H12    |
| 12       | 1.28, m, overlap                        | 14.38               | H11    |

**table S16. NMR data of compound 11.**

$^1\text{H}$  NMR spectrum (500 MHz),  $^{13}\text{C}$  NMR spectrum (125 MHz),  $\text{CDCl}_3$

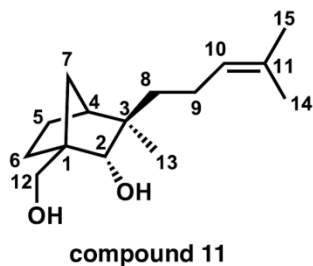

| position | $\delta_{\text{H}}$ , mult ( $J$ in Hz) | $\delta_{\text{C}}$ |
|----------|-----------------------------------------|---------------------|
| 1        |                                         | 53.82               |
| 2        | 3.63, brs                               | 82.59               |
| 3        |                                         | 42.57               |
| 4        | 1.88, m                                 | 46.26               |
| 5        | 1.46, m<br>1.74, m                      | 25.83               |
| 6        | 1.20, m<br>1.88, m                      | 22.16               |
| 7        | 1.09, d (10.1)<br>1.45, m               | 36.59               |
| 8        | 1.31, m                                 | 42.81               |
| 9        | 1.96, m                                 | 22.95               |
| 10       | 5.09, m                                 | 124.95              |
| 11       |                                         | 131.47              |
| 12       | 3.75, d (10.5)<br>3.84, d (10.5)        | 68.54               |
| 13       | 0.87, s                                 | 16.47               |
| 14       | 1.61, s                                 | 17.79               |
| 15       | 1.68, s                                 | 25.85               |

Note: The NMR data is identical to the data previously reported (9).

**table S17. NMR data of compound 12.**

$^1\text{H}$  NMR spectrum (500 MHz),  $^{13}\text{C}$  NMR spectrum (125 MHz),  $\text{CDCl}_3$

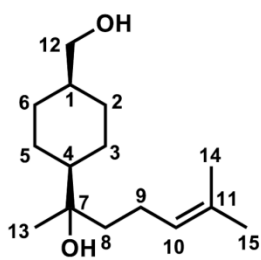

**compound 12**

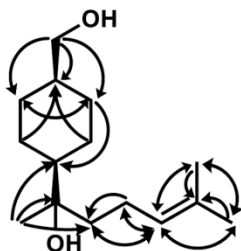

**Key HMBC correlations**

| position       | $\delta_{\text{H}}$ , mult ( $J$ in Hz) | $\delta_{\text{C}}$ | COSY        |
|----------------|-----------------------------------------|---------------------|-------------|
| 1              | 1.43, m                                 | 40.63               | H2, H6, H12 |
| 2 <sup>a</sup> | 0.95, m, overlap<br>1.87, m, overlap    | 29.71               | H1, H3      |
| 3 <sup>b</sup> | 1.08, m, overlap<br>1.81, m             | 26.95               | H2, H4      |
| 4              | 1.32, m                                 | 47.52               | H3, H5      |
| 5 <sup>b</sup> | 1.12, m, overlap<br>1.89, m, overlap    | 26.22               | H4, H6      |
| 6 <sup>a</sup> | 0.95, m, overlap<br>1.87, m, overlap    | 29.76               | H1, H5      |
| 7              |                                         | 74.61               |             |
| 8              | 1.49, dd (9.9, 6.8)                     | 39.90               | H9          |
| 9              | 2.05, m                                 | 22.27               | H8, H10     |
| 10             | 5.13, t (7.3)                           | 124.70              | H9          |
| 11             |                                         | 131.92              |             |
| 12             | 3.46, d (6.3)                           | 68.78               |             |
| 13             | 1.11, s                                 | 24.03               |             |
| 14             | 1.62, s                                 | 17.83               |             |
| 15             | 1.69, s                                 | 25.88               |             |

Note: <sup>a, b</sup> Assignments denoted by superscript letters are interchangeable.

**table S18. NMR data of compound 13.**

$^1\text{H}$  NMR spectrum (500 MHz),  $^{13}\text{C}$  NMR spectrum (125 MHz),  $\text{CDCl}_3$

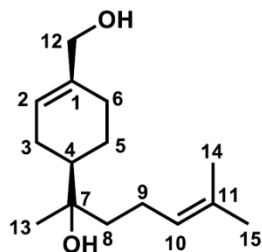

**compound 13**

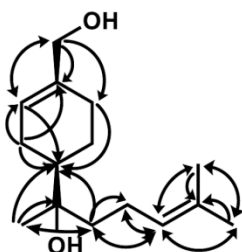

**Key HMBC correlations**

| position           | $\delta_{\text{H}}$ , mult ( $J$ in Hz) | $\delta_{\text{C}}$ | COSY    |
|--------------------|-----------------------------------------|---------------------|---------|
| 1                  |                                         | 137.73              |         |
| 2                  | 5.68, m                                 | 122.58              | H3      |
| 3                  | 2.13, m, overlap<br>2.15, m             | 26.75               | H2, H4  |
| 4                  | 1.60, m, overlap                        | 43.28               | H3, H5  |
| 5                  | 1.29, m<br>1.89, m, overlap             | 23.41               | H4, H6  |
| 6                  | 1.86, m<br>2.05, m, overlap             | 26.75               | H5      |
| 7                  |                                         | 74.44               |         |
| 7-OH <sup>a</sup>  | 1.25, brs                               |                     |         |
| 8                  | 1.51, m                                 | 40.21               | H9      |
| 9                  | 2.06, m, overlap                        | 22.23               | H8, H10 |
| 10                 | 5.13, t (7.3)                           | 124.59              | H9      |
| 11                 |                                         | 132.03              |         |
| 12                 | 4.02, m                                 | 67.31               |         |
| 12-OH <sup>a</sup> | 1.15, brs                               |                     |         |
| 13                 | 1.12, s                                 | 23.41               |         |
| 14                 | 1.62, s                                 | 17.85               |         |
| 15                 | 1.69, s                                 | 25.88               |         |

Note: <sup>a</sup> Assignments denoted by superscript letters are interchangeable.

table S19. NMR data of compound 14.

<sup>1</sup>H NMR spectrum (500 MHz), <sup>13</sup>C NMR spectrum (125 MHz), CDCl<sub>3</sub>

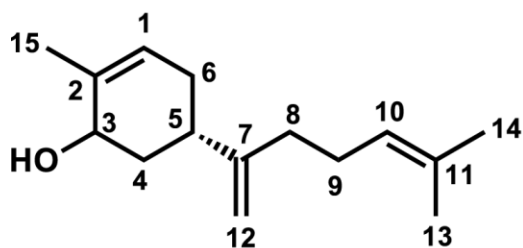

compound 14

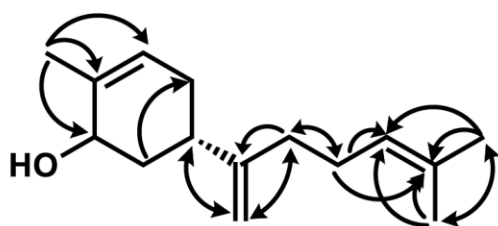

Key HMBC correlations

| position | $\delta_H$ , mult (J in Hz) | $\delta_C$ | COSY    |
|----------|-----------------------------|------------|---------|
| 1        | 5.59                        | 125.69     | H6      |
| 2        |                             | 134.41     |         |
| 3        | 4.02, brs                   | 68.81      | H4      |
| 4        | 1.59, m, overlap<br>1.95, m | 37.34      | H3, H5  |
| 5        | 2.33, m                     | 34.14      | H4, H6  |
| 6        | 1.83, m<br>2.16, m, overlap | 31.74      | H1, H5  |
| 7        |                             | 153.42     |         |
| 8        | 2.08, m                     | 35.04      | H9      |
| 9        | 2.13, m, overlap            | 26.90      | H8, H10 |
| 10       | 5.12                        | 124.30     | H9      |
| 11       |                             | 131.79     |         |
| 12       | 4.78, s                     | 107.88     |         |
| 13       | 1.61, s                     | 17.90      |         |
| 14       | 1.68, s                     | 25.85      |         |
| 15       | 1.80, s                     | 20.99      |         |

table S20. NMR data of compound 15.

<sup>1</sup>H NMR spectrum (500 MHz), <sup>13</sup>C NMR spectrum (125 MHz), CDCl<sub>3</sub>

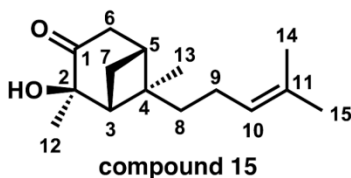

compound 15

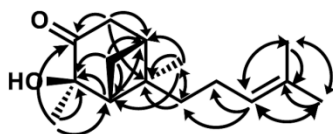

Key HMBC correlations

| position | $\delta_H$ , mult (J in Hz) | $\delta_C$ | COSY    |
|----------|-----------------------------|------------|---------|
| 1        |                             | 214.32     |         |
| 2        |                             | 77.27      |         |
| 2-OH     | 2.14, brs                   |            |         |
| 3        | 2.21, m, overlap            | 48.00      | H7      |
| 4        |                             | 42.59      |         |
| 5        | 2.18, m, overlap            | 36.94      | H6, H7  |
| 6        | 2.62, m                     | 43.12      | H5      |
| 7        | 1.68, m, overlap<br>2.43, m | 28.77      | H3, H5  |
| 8        | 1.66, m, overlap<br>1.80, m | 39.12      | H9      |
| 9        | 2.00, m                     | 23.78      | H8, H10 |
| 10       | 5.16, m                     | 124.51     | H9      |
| 11       |                             | 131.82     |         |
| 12       | 1.39, s                     | 25.51      |         |
| 13       | 0.88, s                     | 19.90      |         |
| 14       | 1.63, s                     | 17.77      |         |
| 15       | 1.70, s                     | 25.87      |         |



table S21. NMR data of compound 16.

$^1\text{H}$  NMR spectrum (500 MHz),  $^{13}\text{C}$  NMR spectrum (125 MHz),  $\text{CDCl}_3$

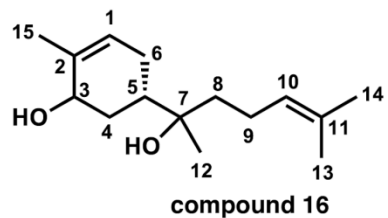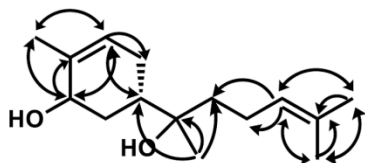

| position | $\delta_{\text{H}}$ , mult (J in Hz)        | $\delta_{\text{C}}$ | COSY    |
|----------|---------------------------------------------|---------------------|---------|
| 1        | 5.56, m                                     | 125.41              | H6      |
| 2        |                                             | 134.61              |         |
| 3        | 4.04, m                                     | 68.78               |         |
| 4        | 1.42, td (13.2, 3.8, 1)<br>2.03, m, overlap | 32.18               | H5      |
| 5        | 1.78, m, overlap                            | 36.99               | H4, H6  |
| 6        | 1.74, m, overlap<br>2.04, m, overlap        | 27.32               | H1, H5  |
| 7        |                                             | 73.96               |         |
| 8        | 1.50, m                                     | 40.41               | H9      |
| 9        | 2.06, m, overlap                            | 22.20               | H8, H10 |
| 10       | 5.12, m                                     | 124.57              | H9      |
| 11       |                                             | 131.98              |         |
| 12       | 1.11, s                                     | 23.39               |         |
| 13       | 1.61, s                                     | 17.84               |         |
| 14       | 1.68, s                                     | 25.86               |         |
| 15       | 1.78, s                                     | 21.00               |         |

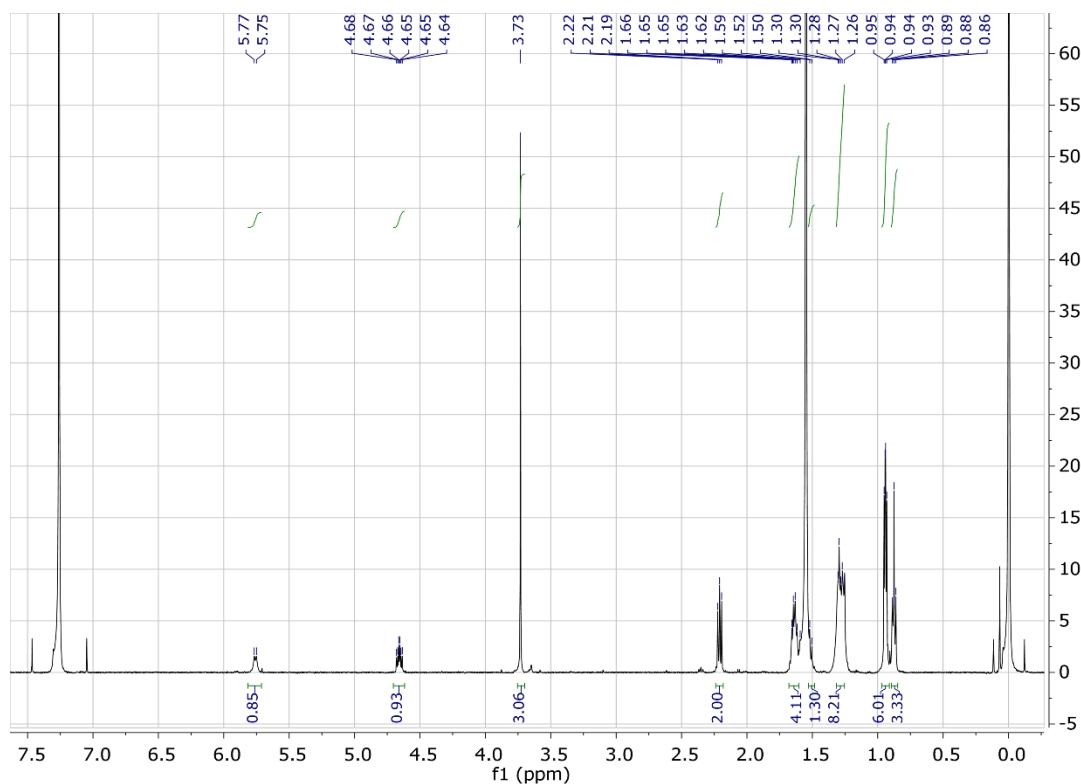

fig. S25.  $^1\text{H}$  NMR spectrum of compound 6 in  $\text{CDCl}_3$ .

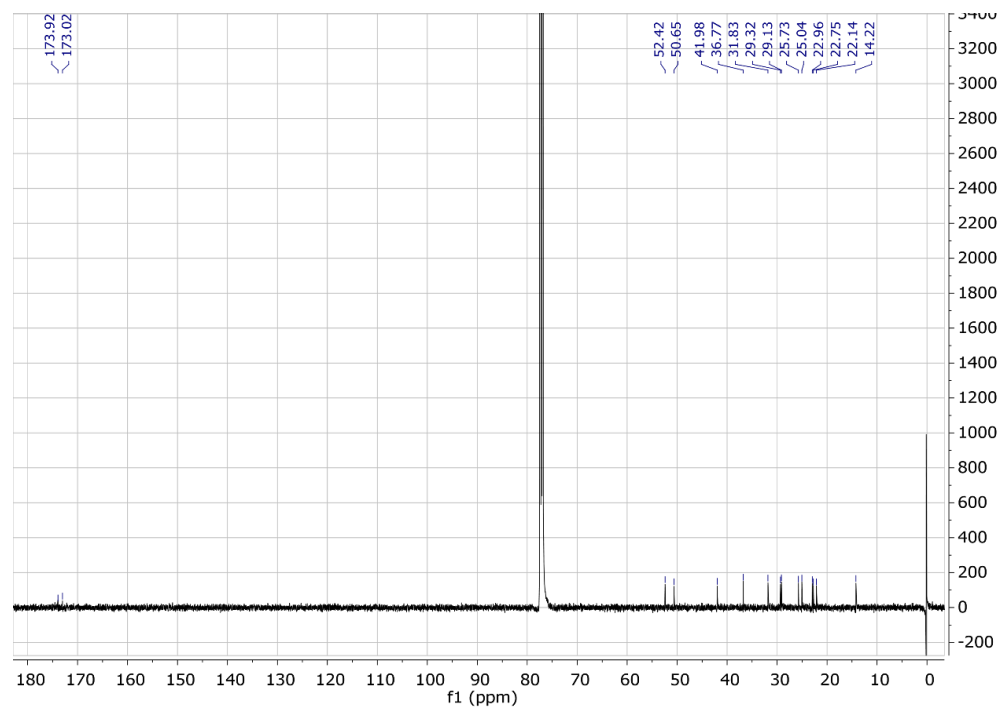

fig. S26.  $^{13}\text{C}$  NMR spectrum of compound 6 in  $\text{CDCl}_3$ .

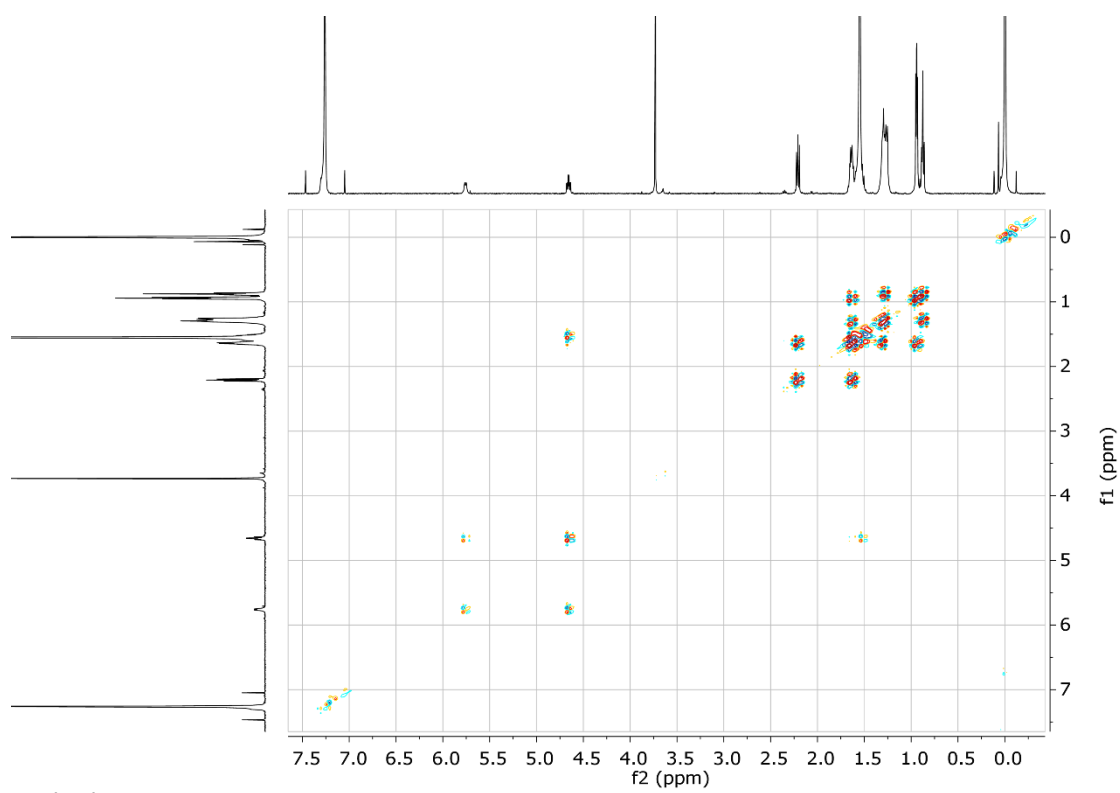

fig. S27.  $^1\text{H}$ - $^1\text{H}$  COSY spectrum of compound 6 in  $\text{CDCl}_3$ .

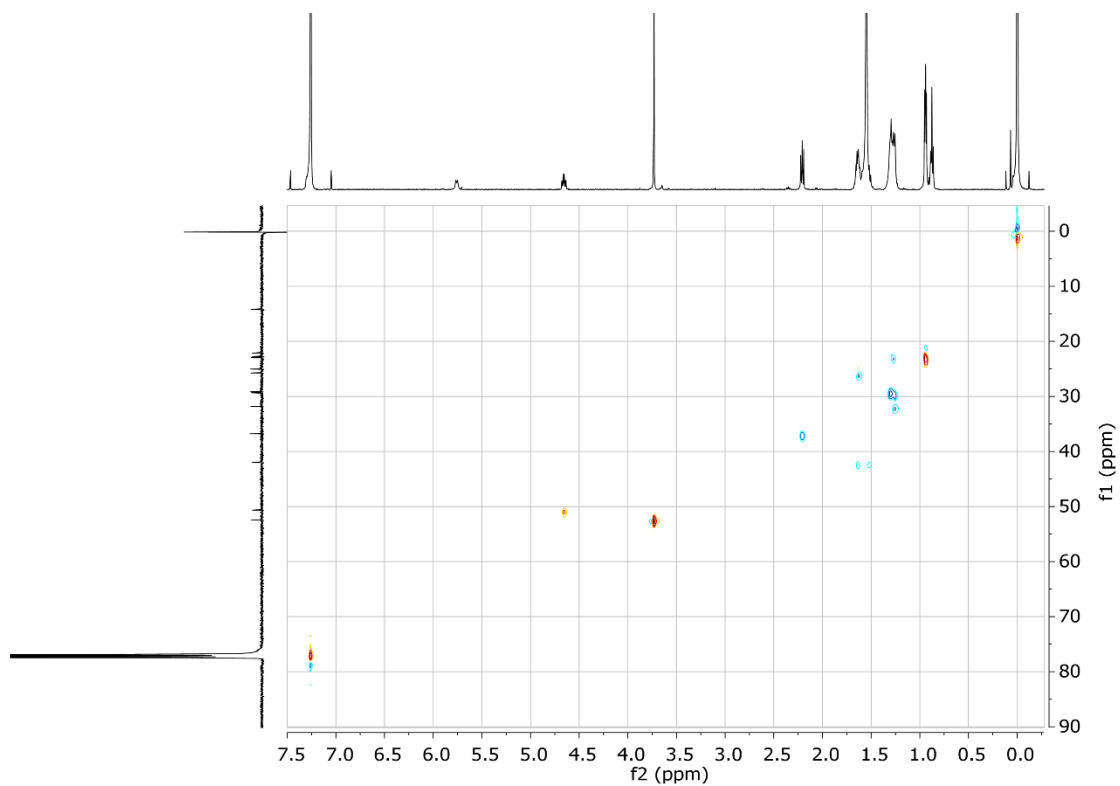

fig. S28. HSQC spectrum of compound 6 in CDCl<sub>3</sub>.

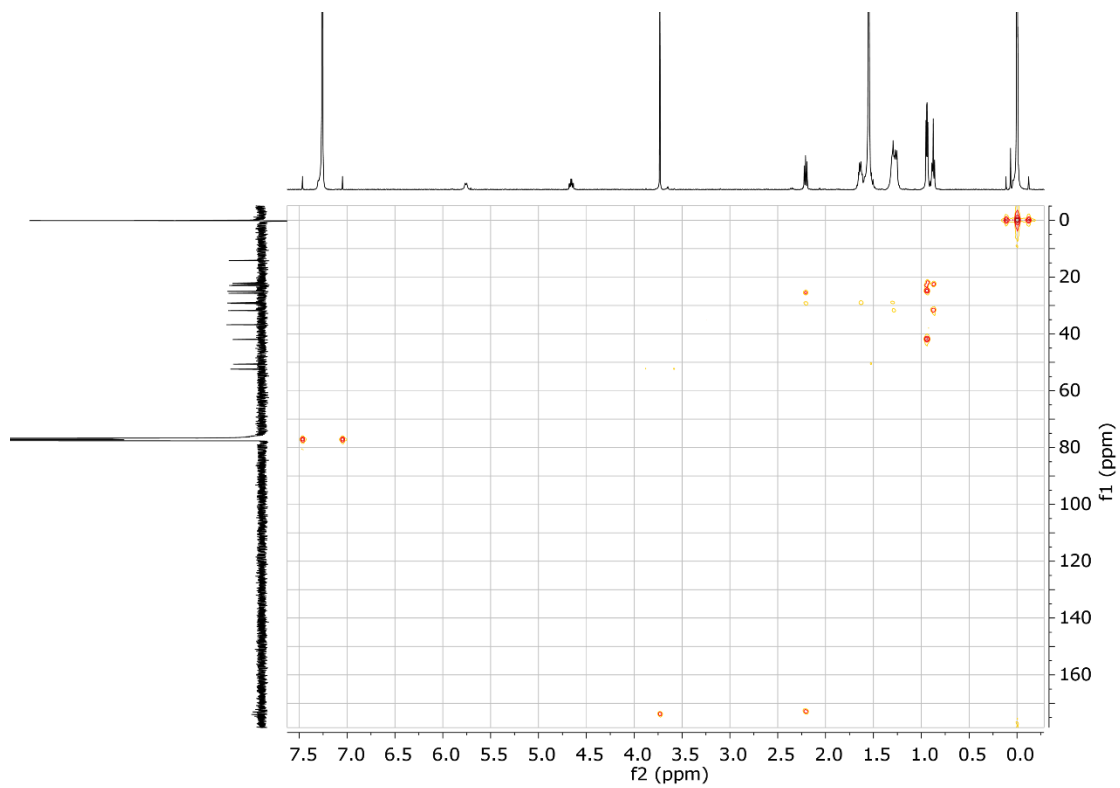

fig. S29. HMBC spectrum of compound 6 in CDCl<sub>3</sub>.

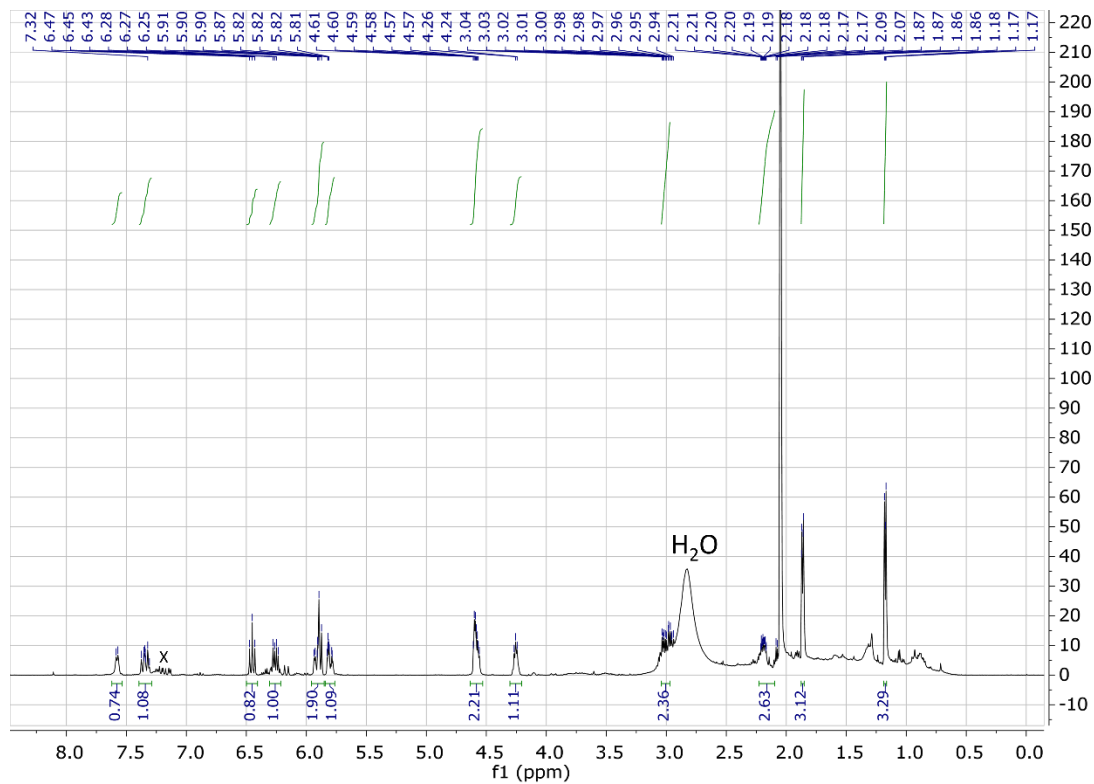

fig. S30. <sup>1</sup>H NMR spectrum of compound 7 in acetone-d<sub>6</sub>.

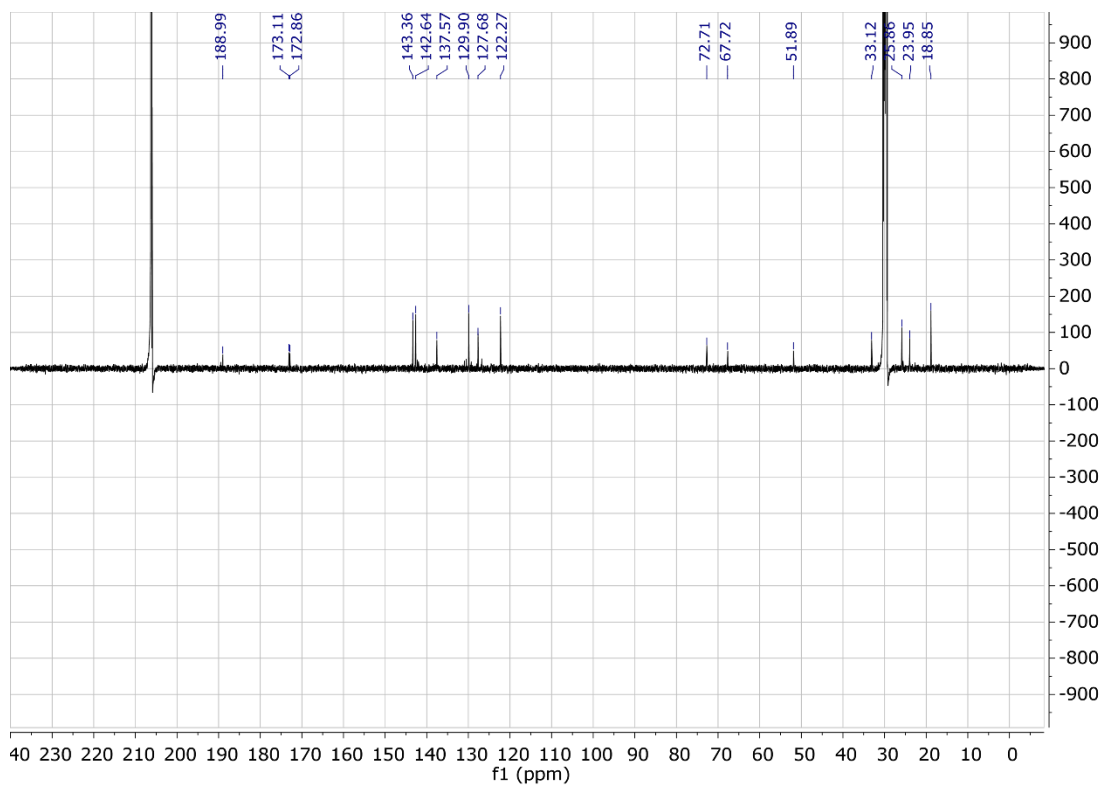

fig. S31. <sup>13</sup>C NMR spectrum of compound 7 in acetone-d<sub>6</sub>.

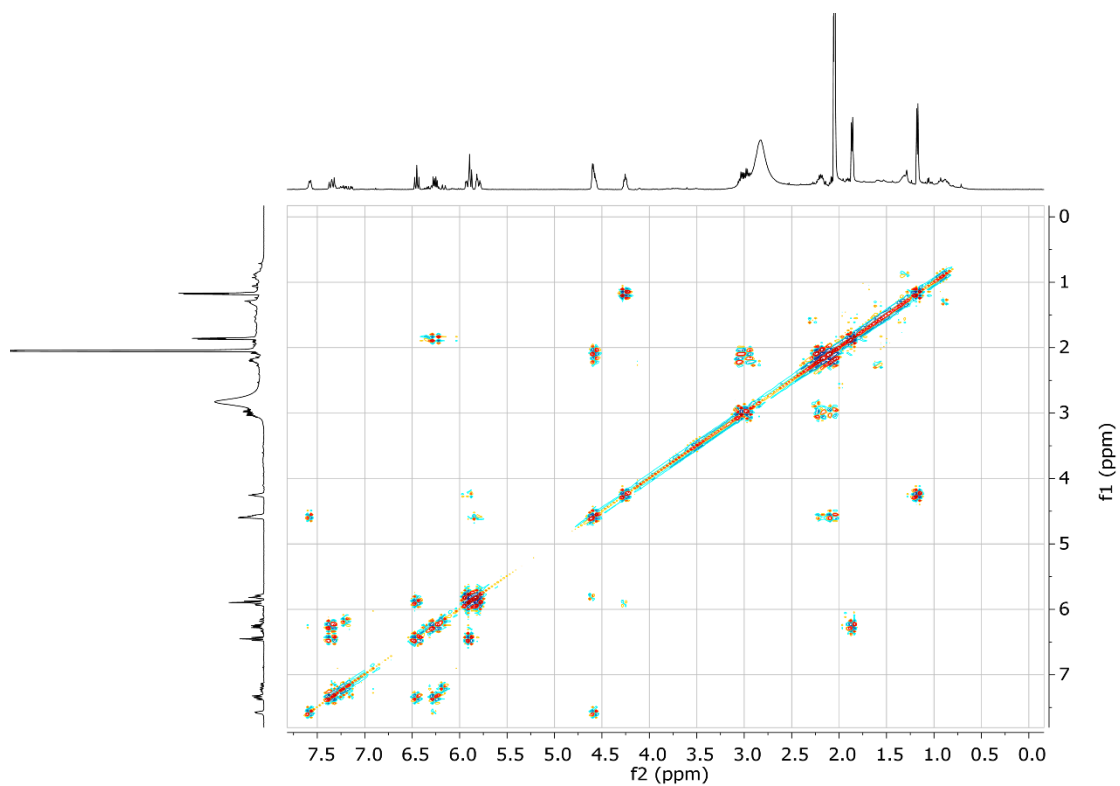

fig. S32.  $^1\text{H}$ - $^1\text{H}$  COSY spectrum of compound 7 in acetone- $\text{d}_6$ .

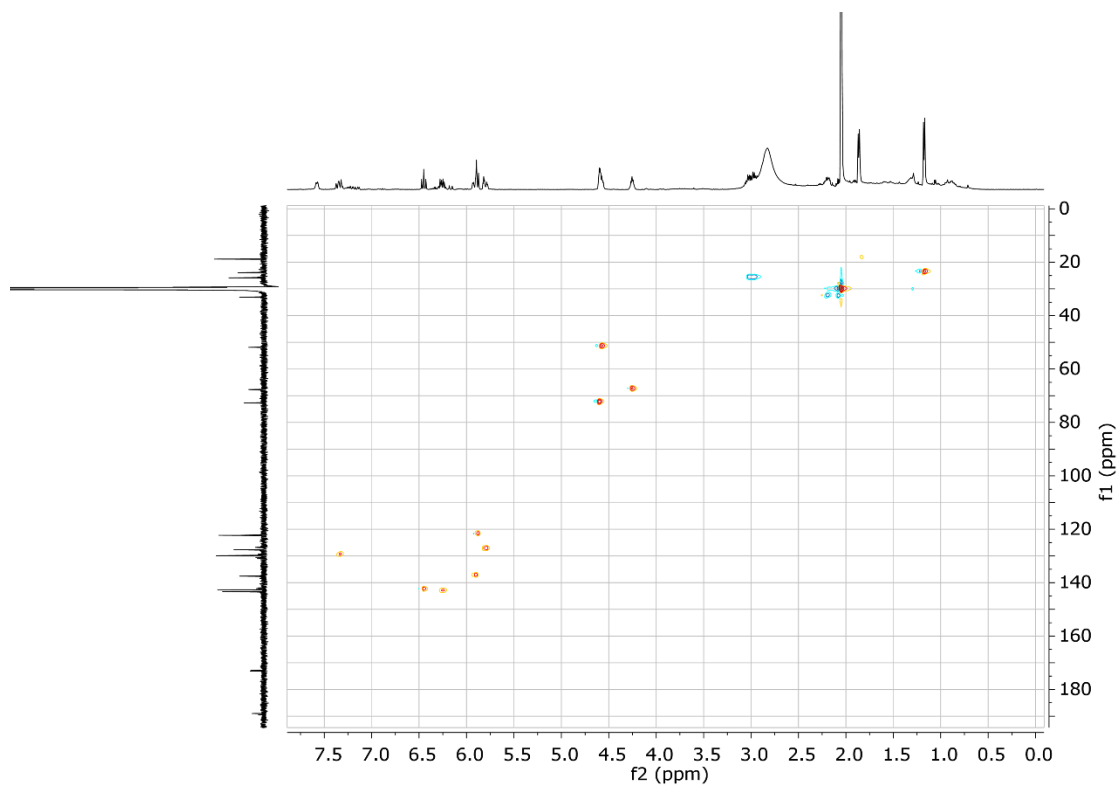

fig. S33. HSQC spectrum of compound 7 in acetone- $\text{d}_6$ .

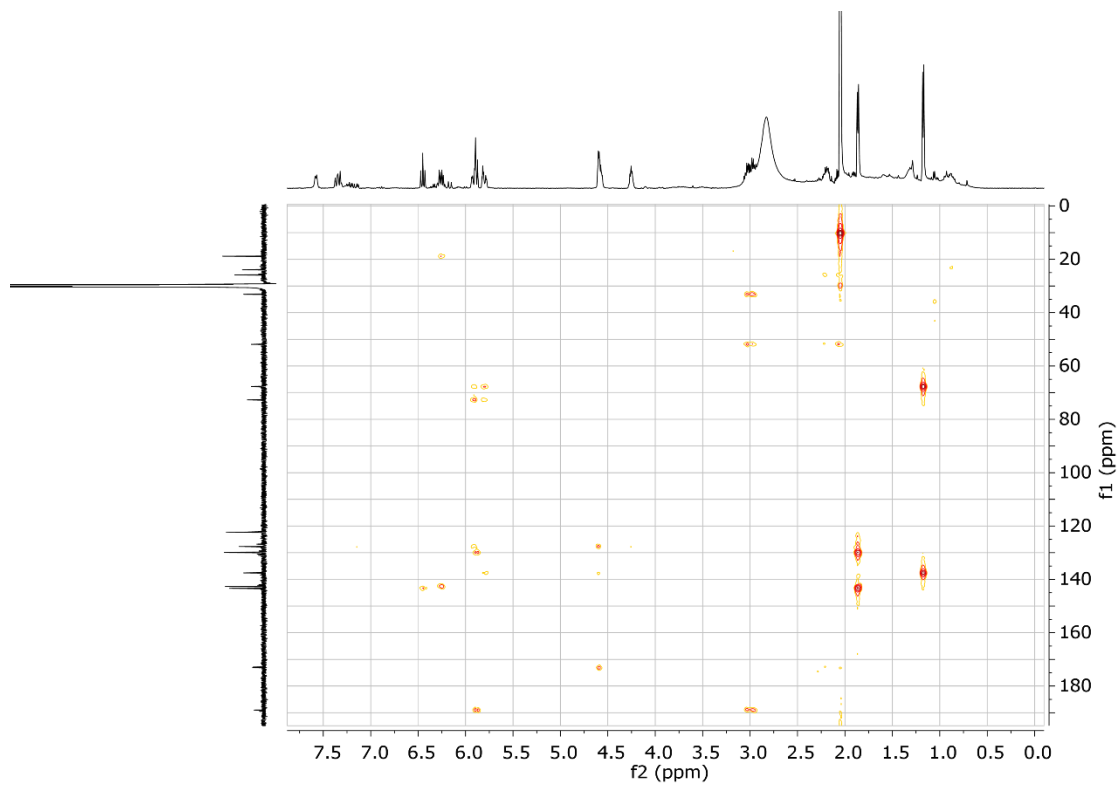

fig. S34. HMBC spectrum of compound 7 in acetone-d<sub>6</sub>.

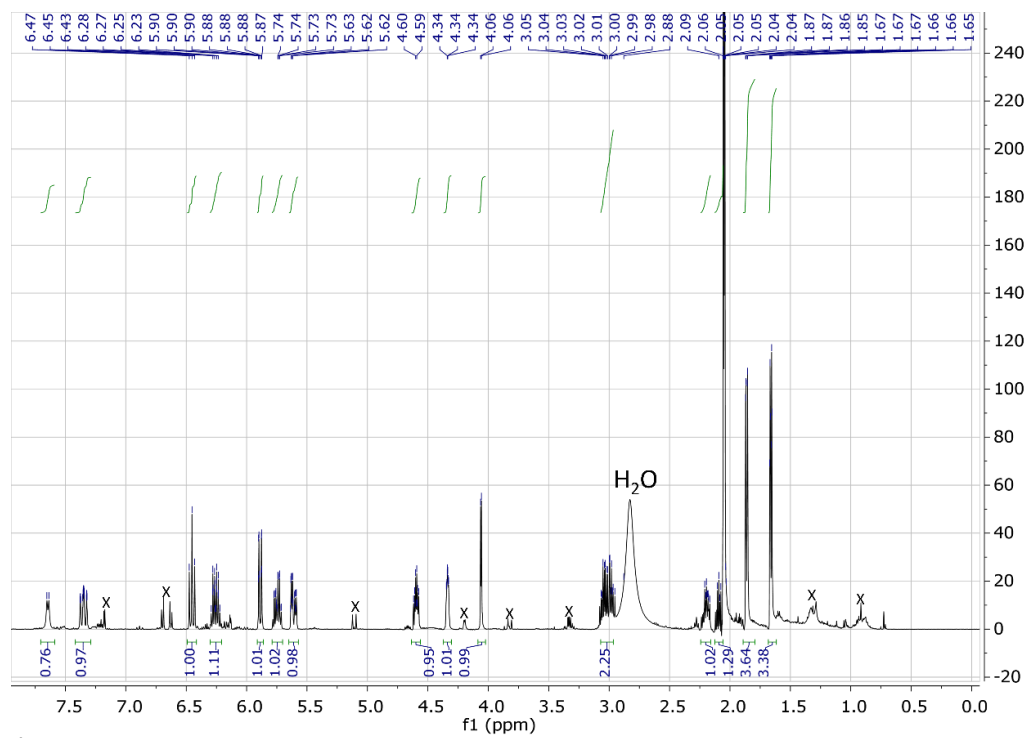

fig. S35. <sup>1</sup>H NMR spectrum of compound 8 in acetone-d<sub>6</sub>.

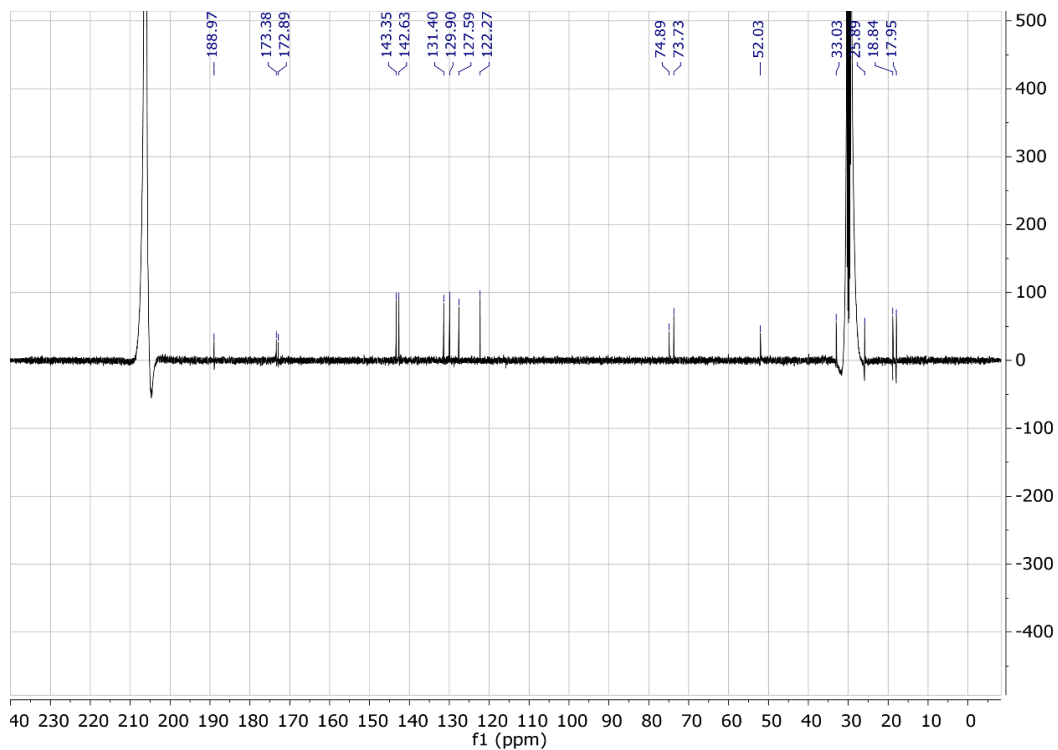

fig. S36.  $^{13}\text{C}$  NMR spectrum of compound 8 in acetone- $\text{d}_6$ .

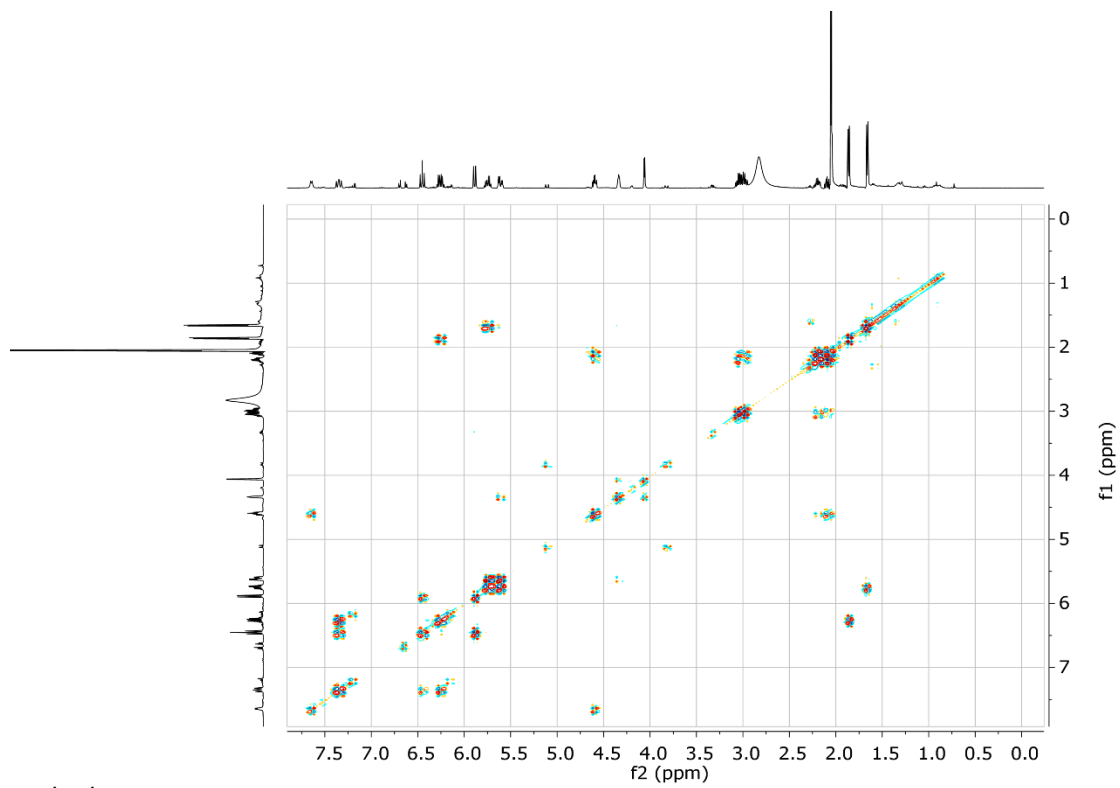

fig. S37.  $^1\text{H}$ - $^1\text{H}$  COSY spectrum of compound 8 in acetone- $\text{d}_6$ .

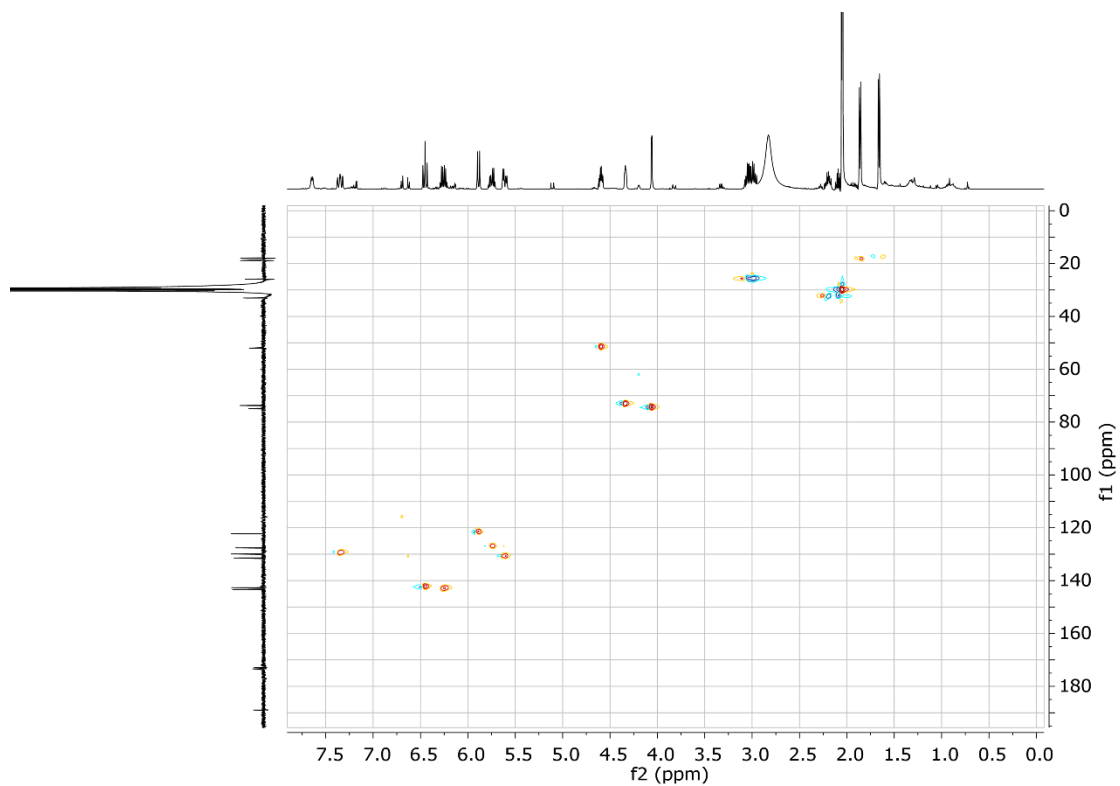

fig. S38. HSQC spectrum of compound 8 in acetone-d<sub>6</sub>.

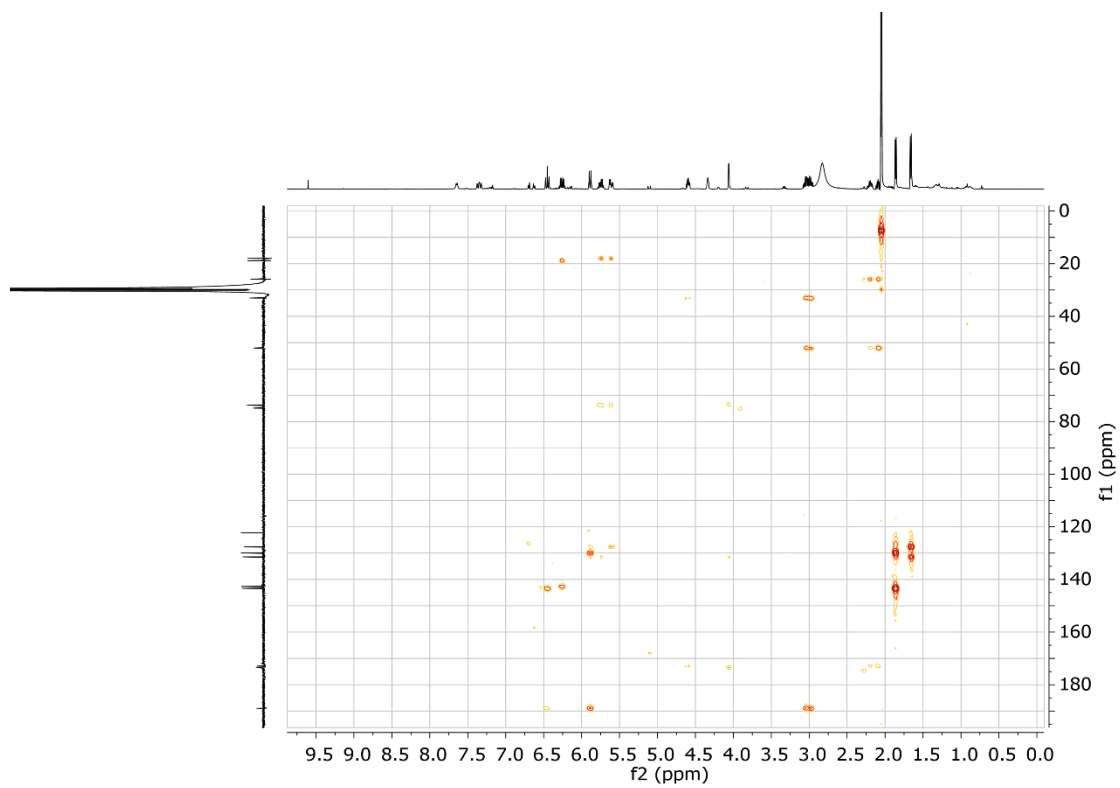

fig. S39. HMBC spectrum of compound 8 in acetone-d<sub>6</sub>.



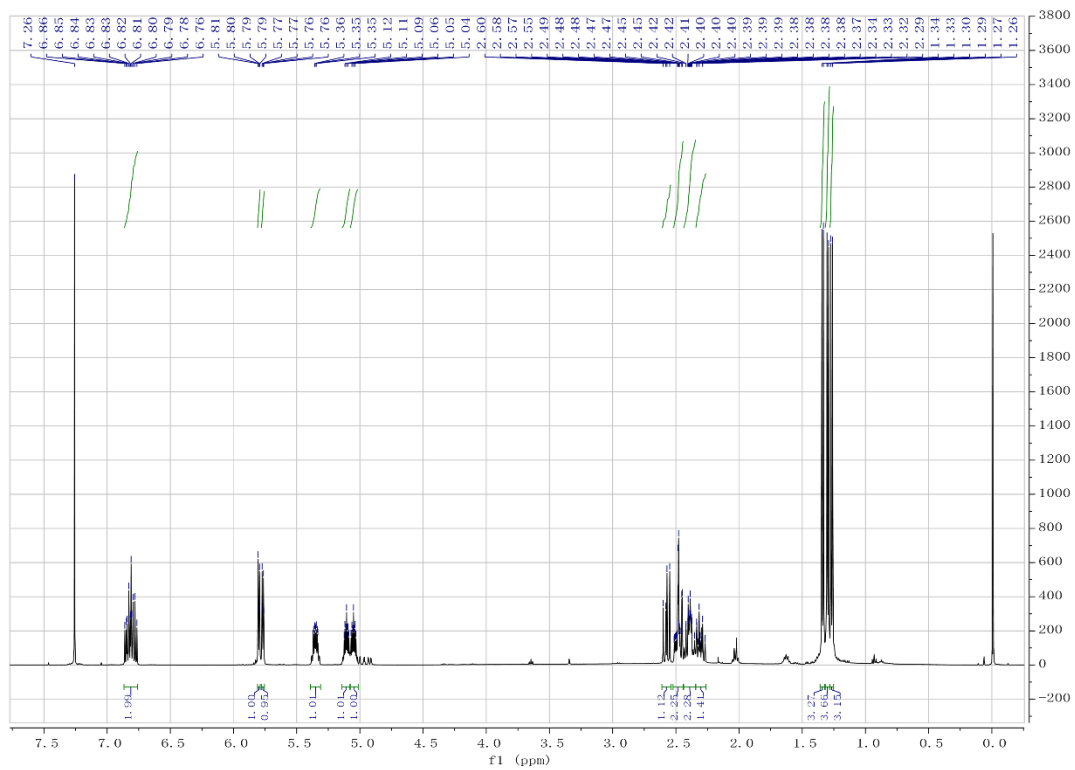

fig. S40.  $^1\text{H}$  NMR spectrum of compound 9 in  $\text{CDCl}_3$ .

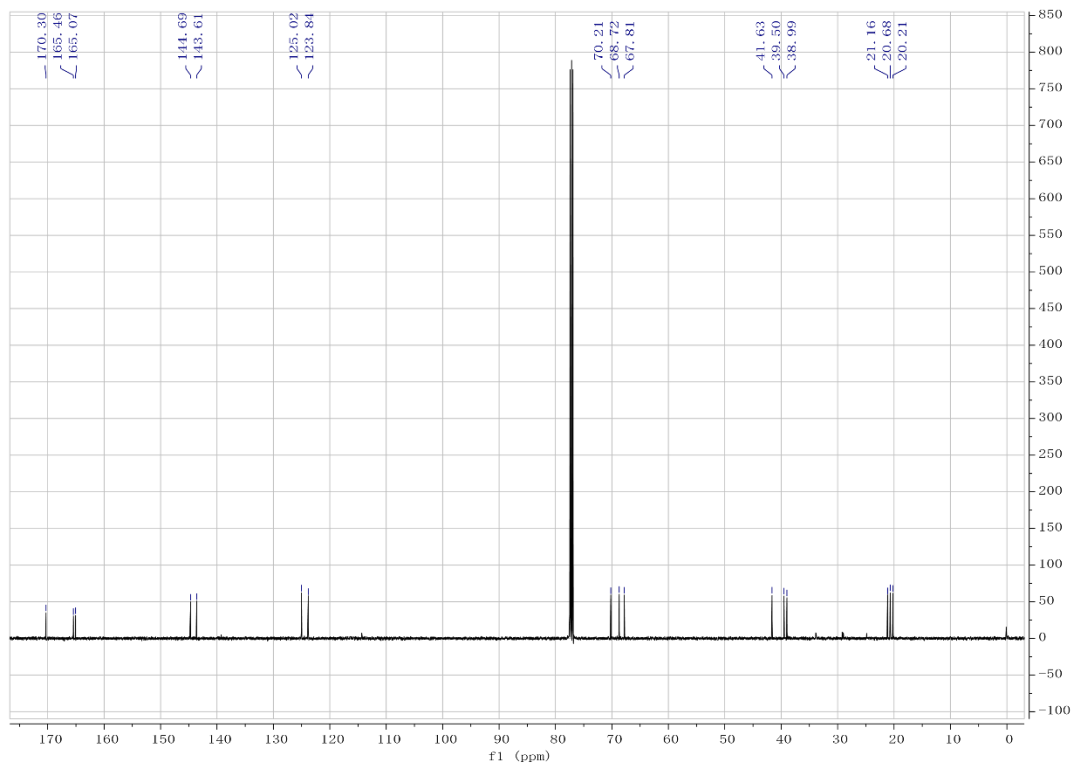

fig. S41.  $^{13}\text{C}$  NMR spectrum of compound 9 in  $\text{CDCl}_3$ .

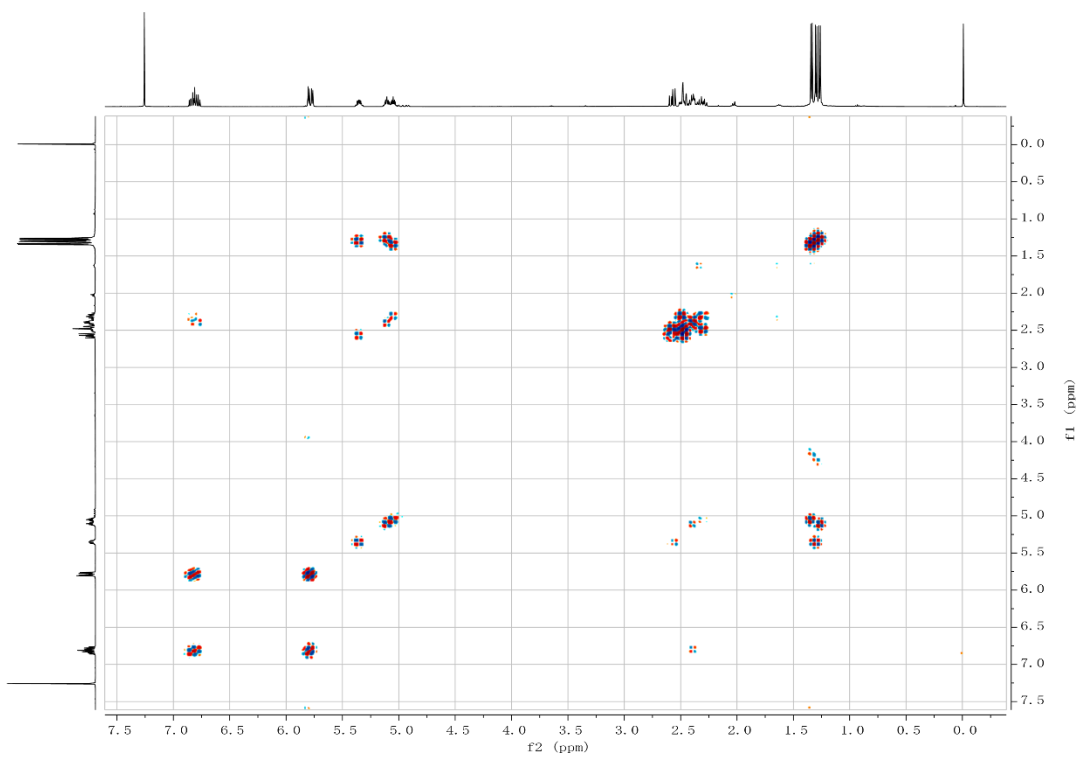

fig. S42.  $^1\text{H}$ - $^1\text{H}$  COSY spectrum of compound 9 in  $\text{CDCl}_3$ .

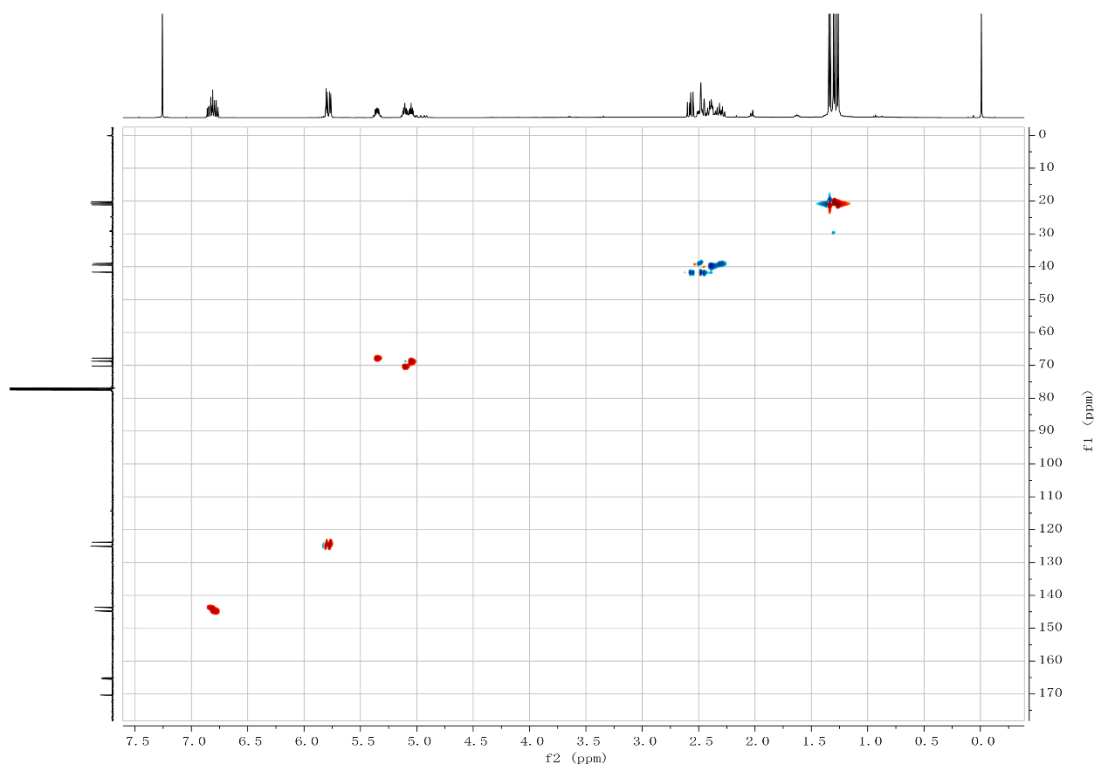

fig. S43. HSQC spectrum of compound 9 in  $\text{CDCl}_3$ .

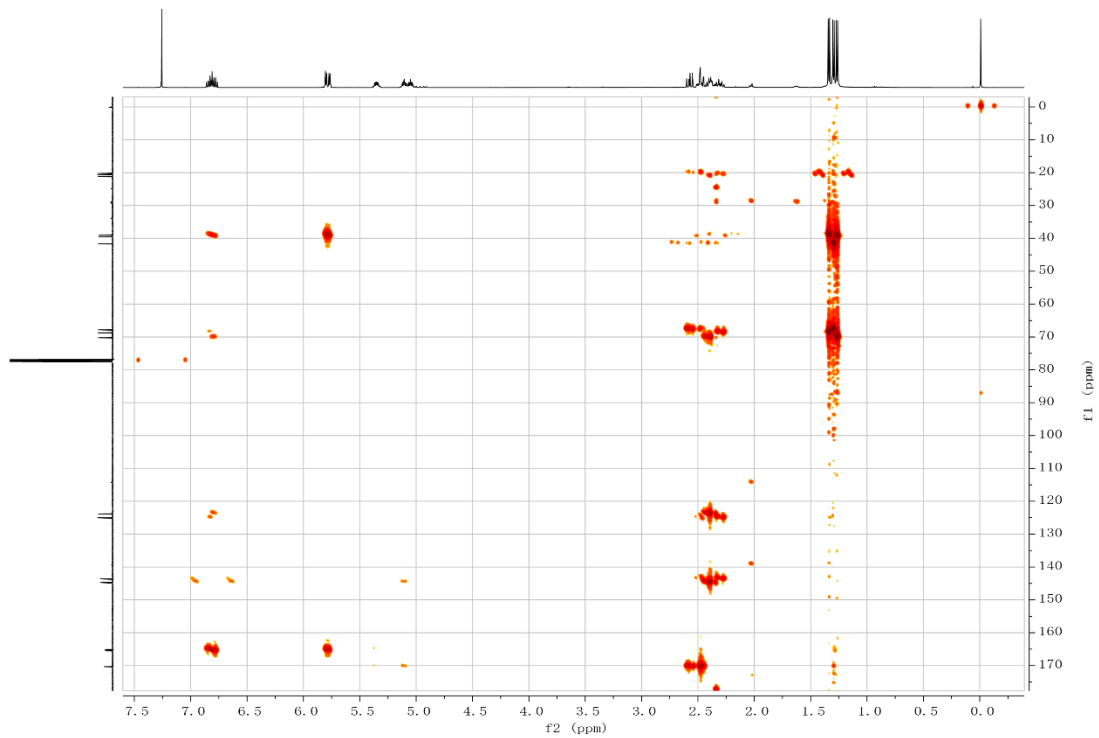

fig. S44. HMBC spectrum of compound 9 in CDCl<sub>3</sub>.

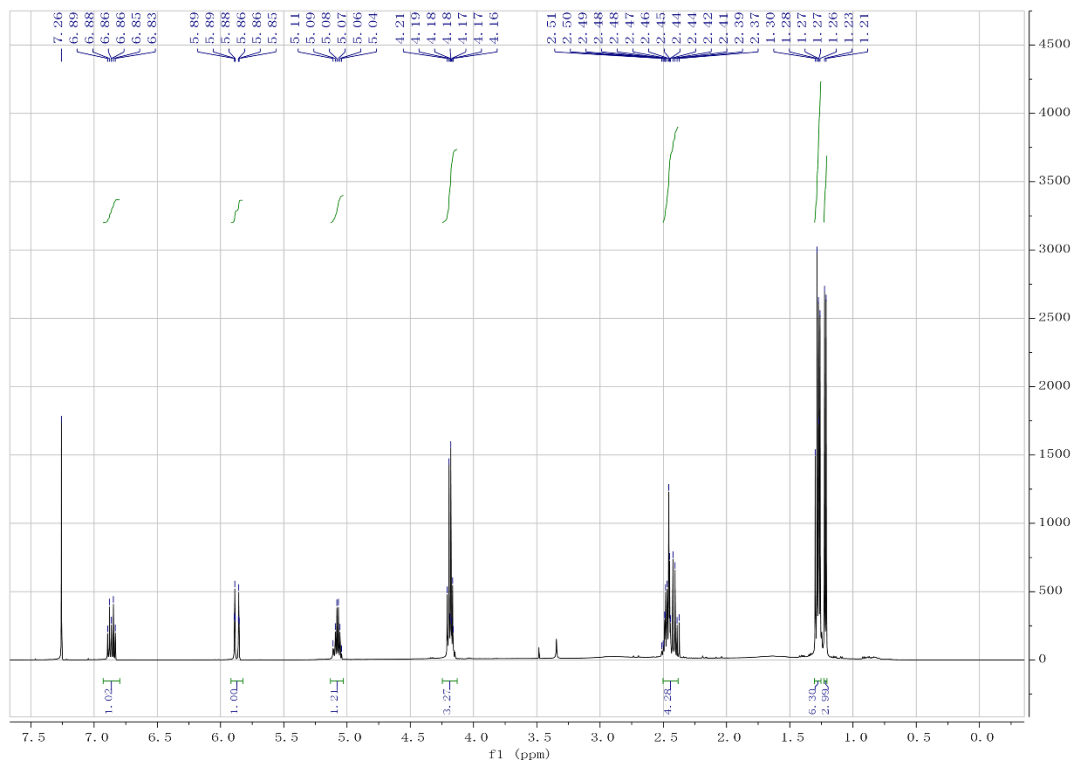

fig. S45. <sup>1</sup>H NMR spectrum of compound 10 in CDCl<sub>3</sub>.

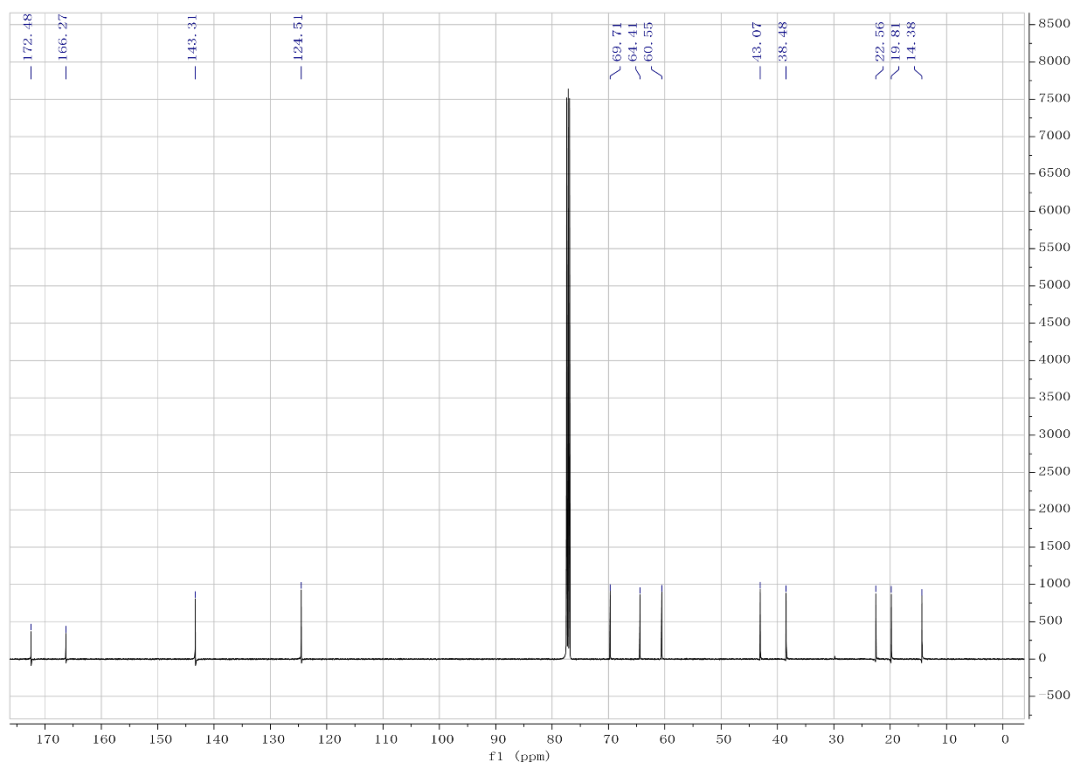

fig. S46.  $^{13}\text{C}$  NMR spectrum of compound 10 in  $\text{CDCl}_3$ .

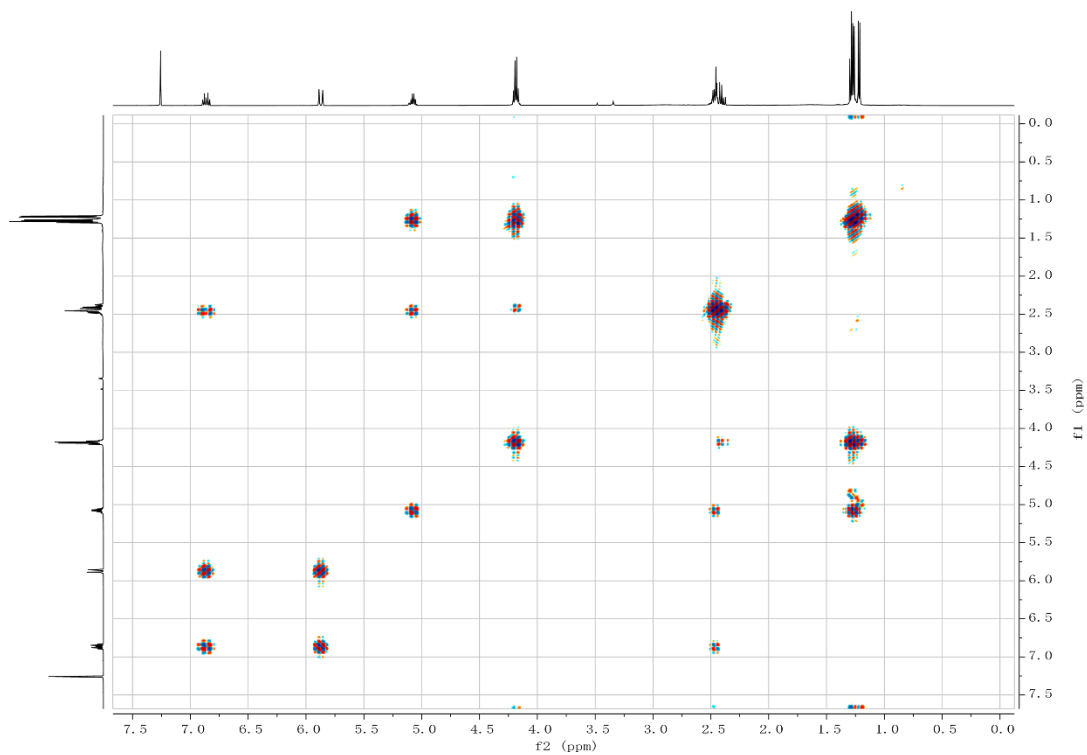

fig. S47.  $^1\text{H}$ - $^1\text{H}$  COSY spectrum of compound 10 in  $\text{CDCl}_3$ .

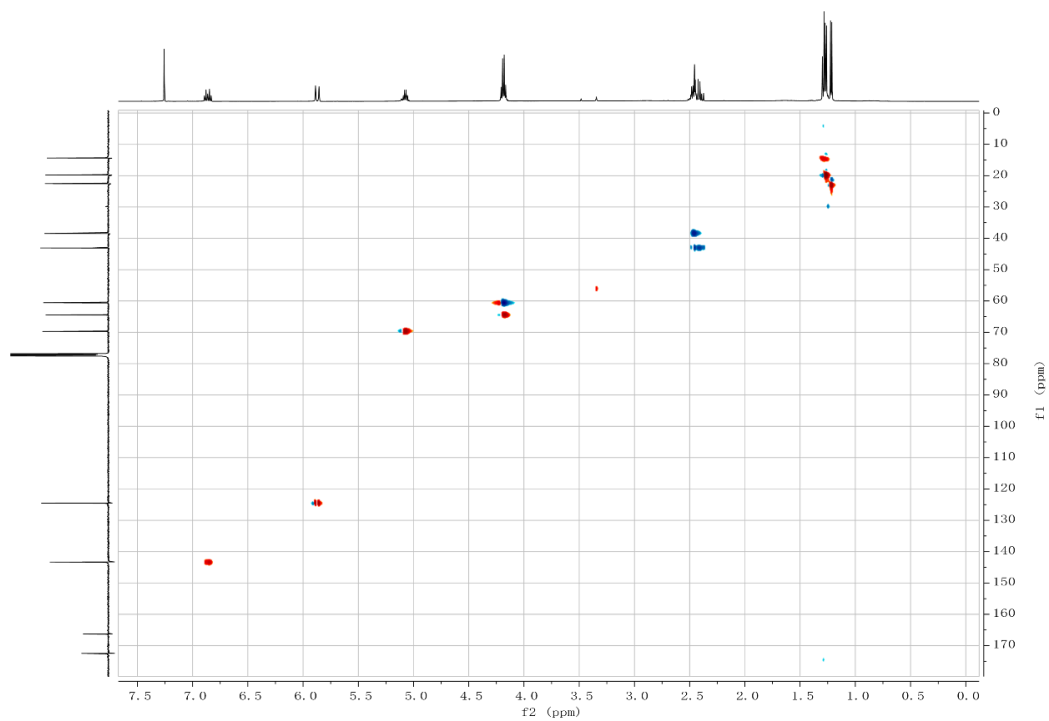

fig. S48. HSQC spectrum of compound 10 in  $\text{CDCl}_3$ .

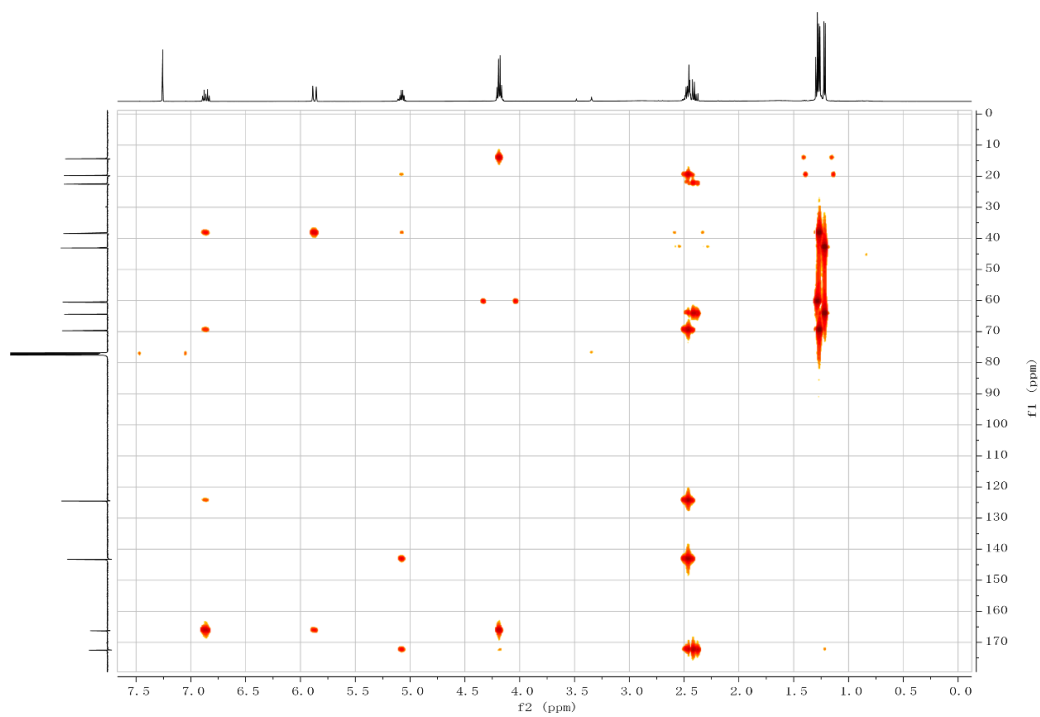

fig. S49. HMBC spectrum of compound 10 in  $\text{CDCl}_3$ .

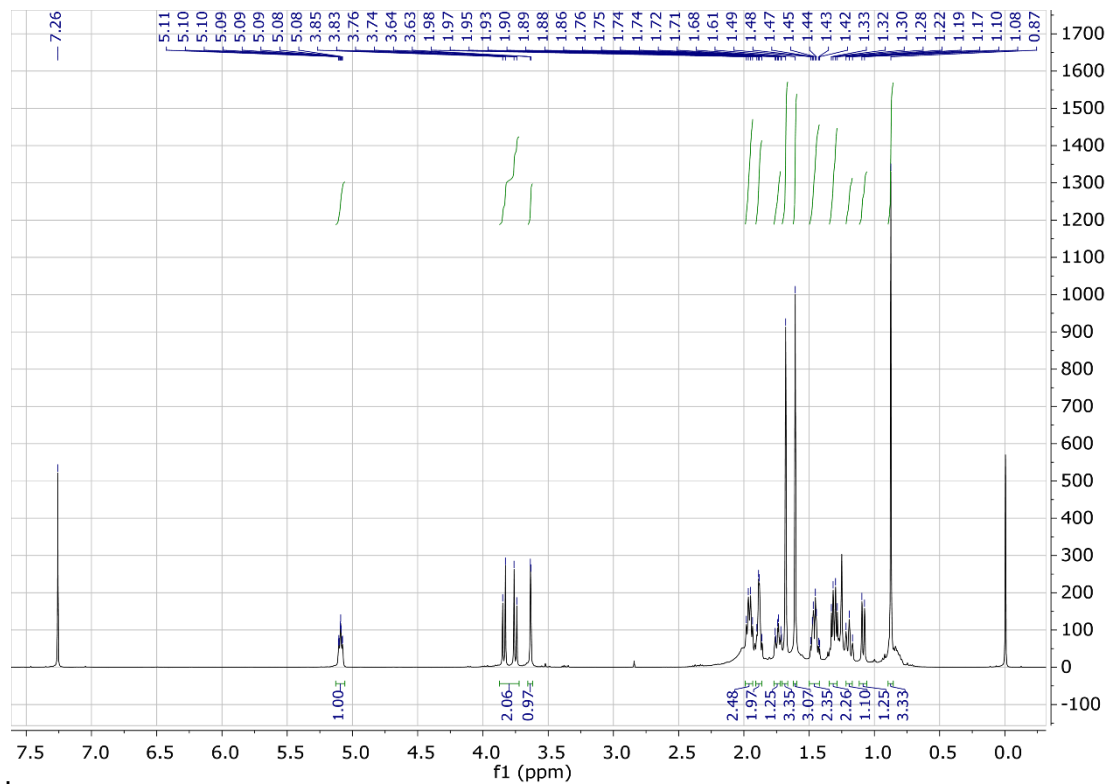

fig. S50.  $^1\text{H}$  NMR spectrum of compound 11 in  $\text{CDCl}_3$ .

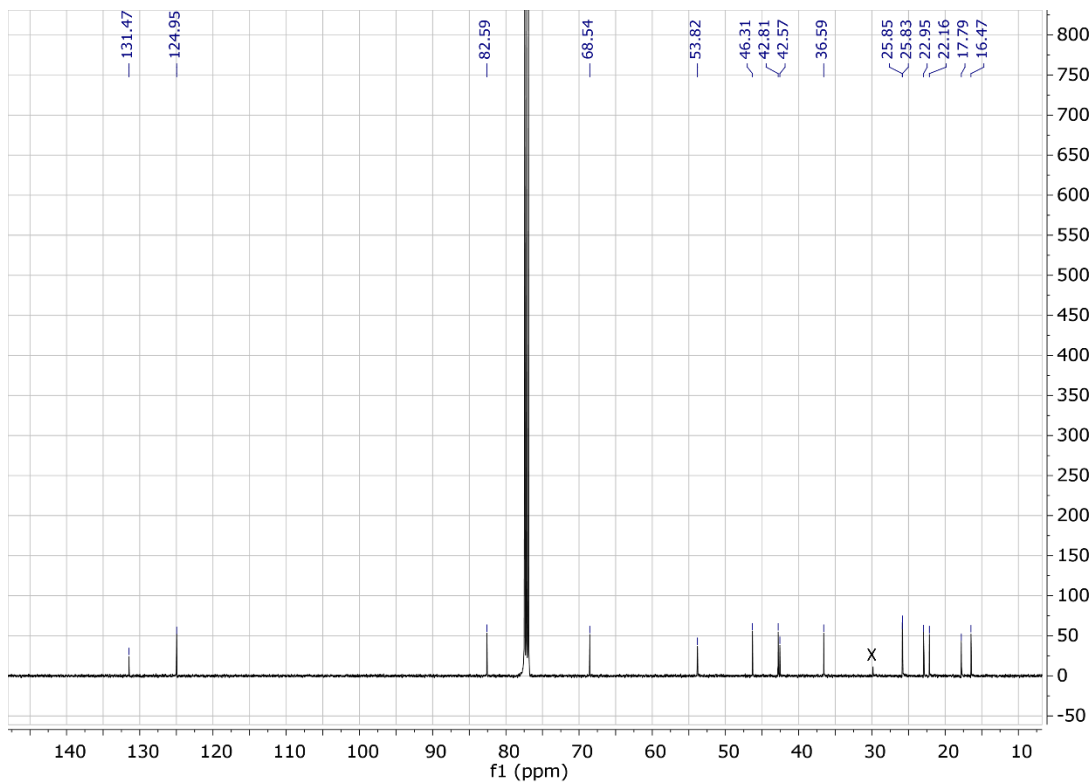

fig. S51.  $^{13}\text{C}$  NMR spectrum of compound 11 in  $\text{CDCl}_3$ .

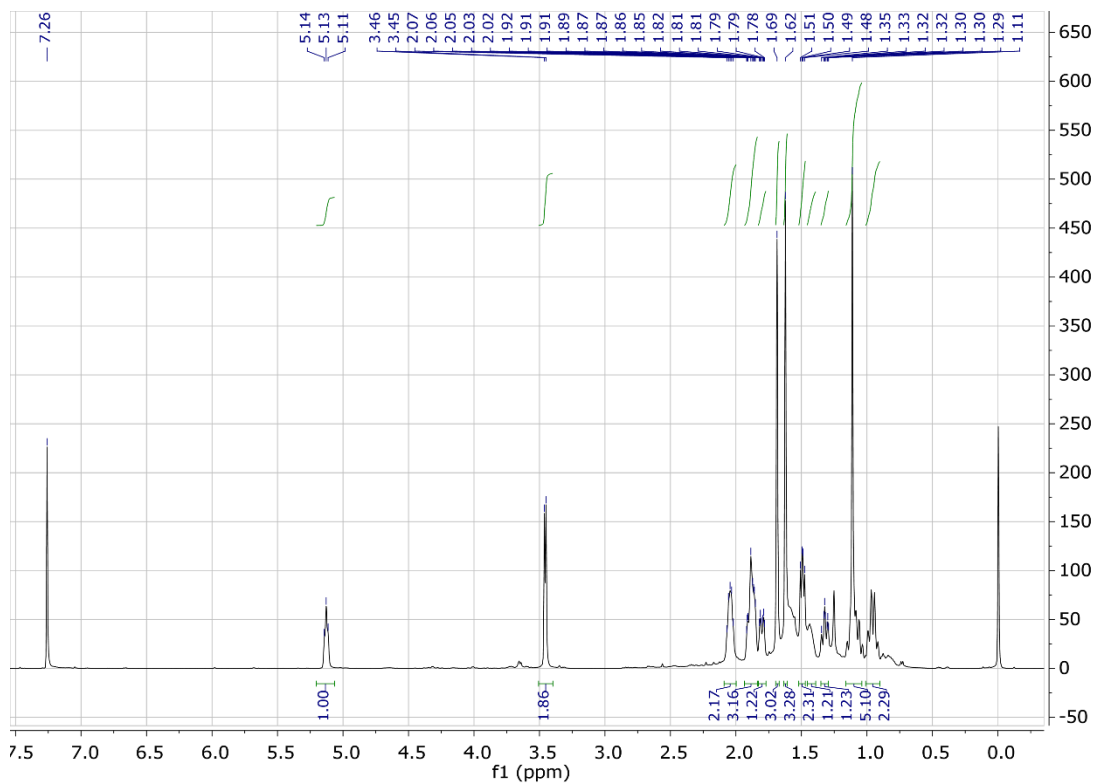

fig. S52.  $^1\text{H}$  NMR spectrum of compound 12 in  $\text{CDCl}_3$ .

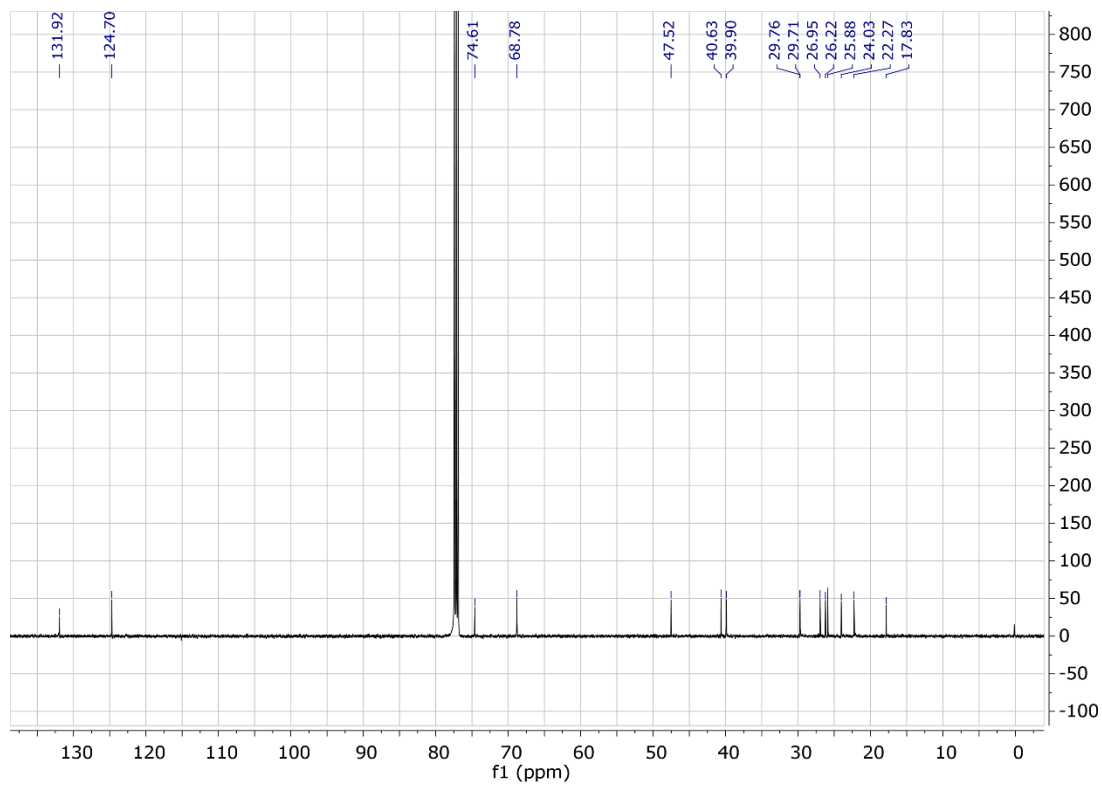

fig. S53.  $^{13}\text{C}$  NMR spectrum of compound 12 in  $\text{CDCl}_3$ .

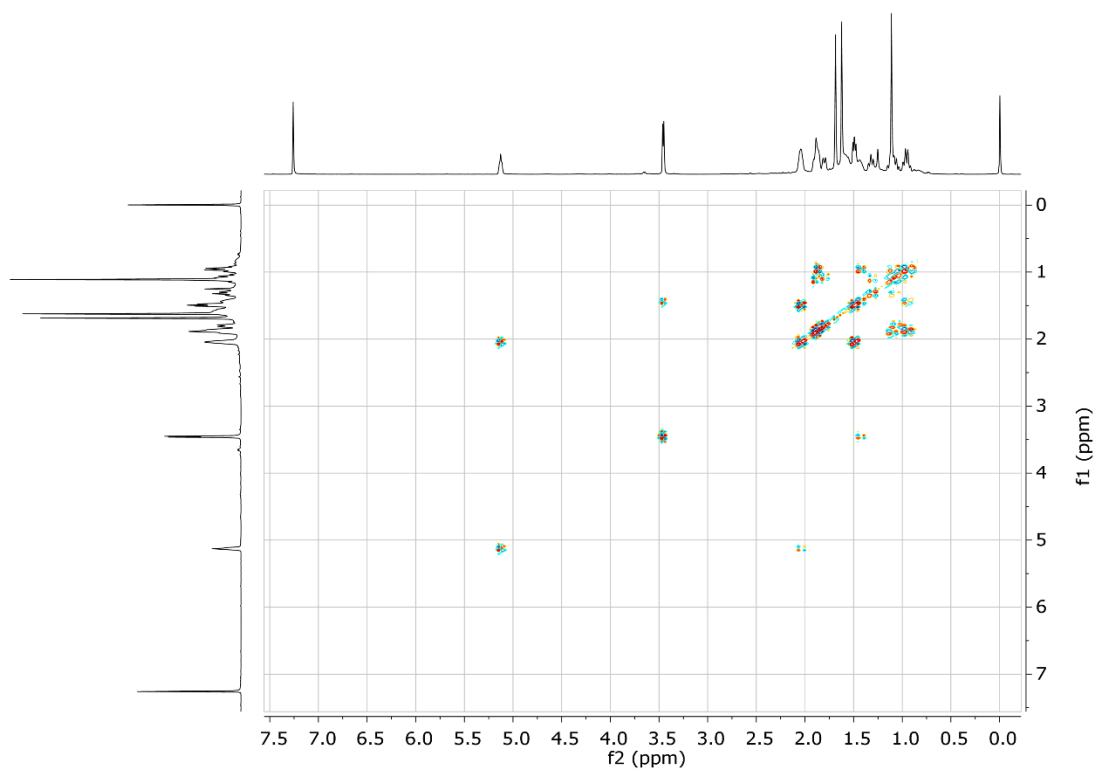

fig. S54.  $^1\text{H}$ - $^1\text{H}$  COSY spectrum of compound 12 in  $\text{CDCl}_3$ .

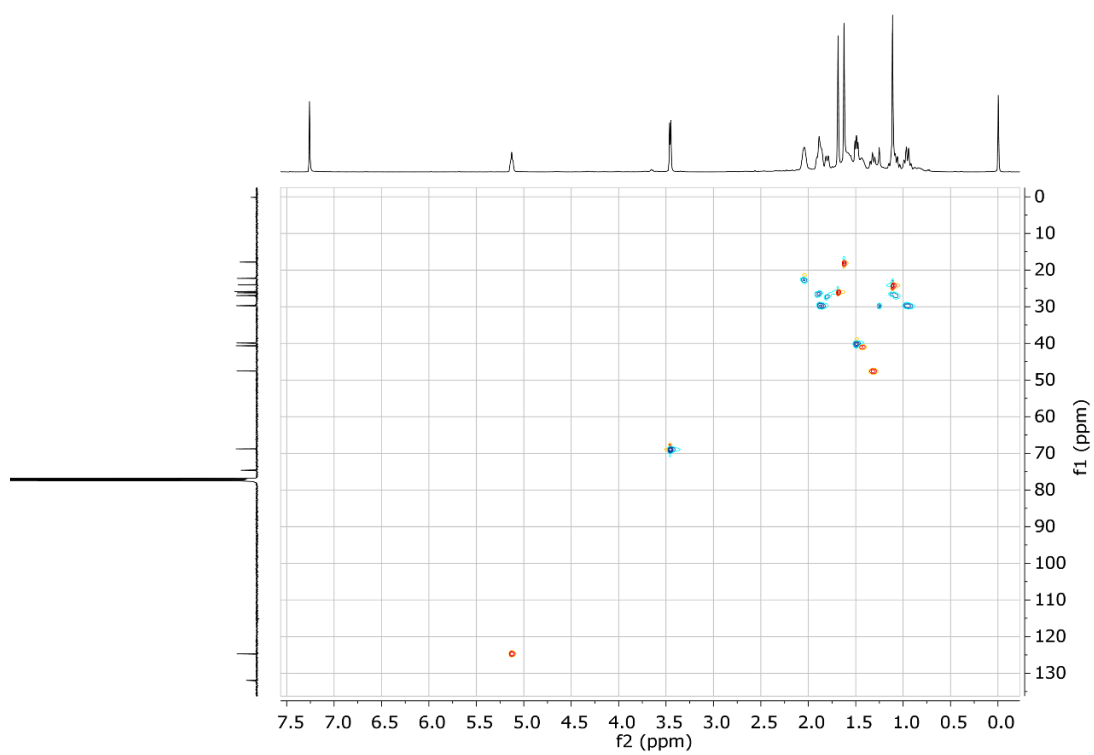

fig. S55. HSQC spectrum of compound 12 in  $\text{CDCl}_3$ .



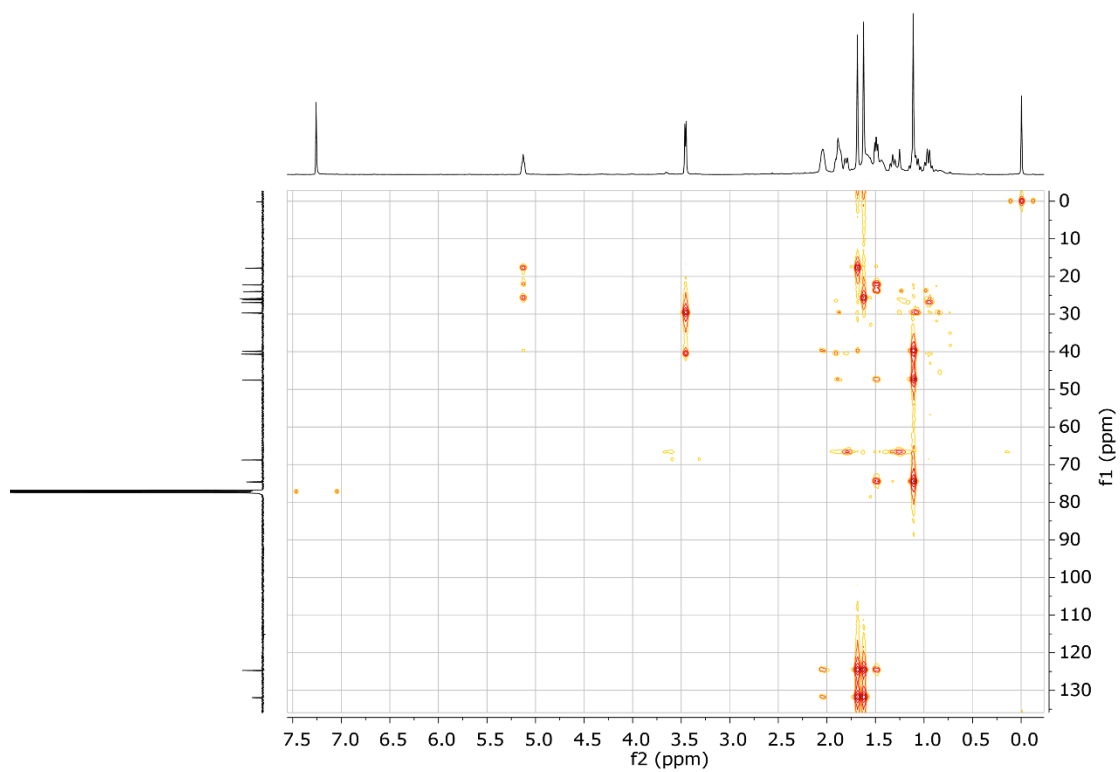

fig. S56. HMBC spectrum of compound 12 in  $\text{CDCl}_3$ .

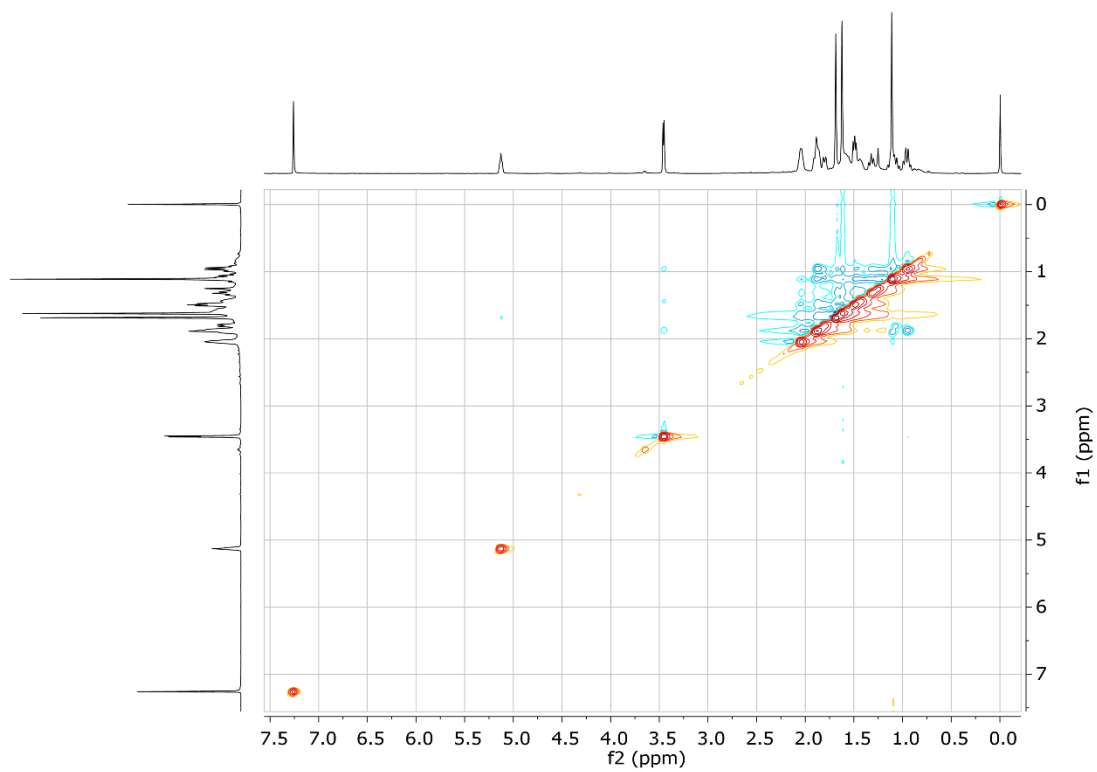

fig. S57. NOESY spectrum of compound 12 in  $\text{CDCl}_3$ .

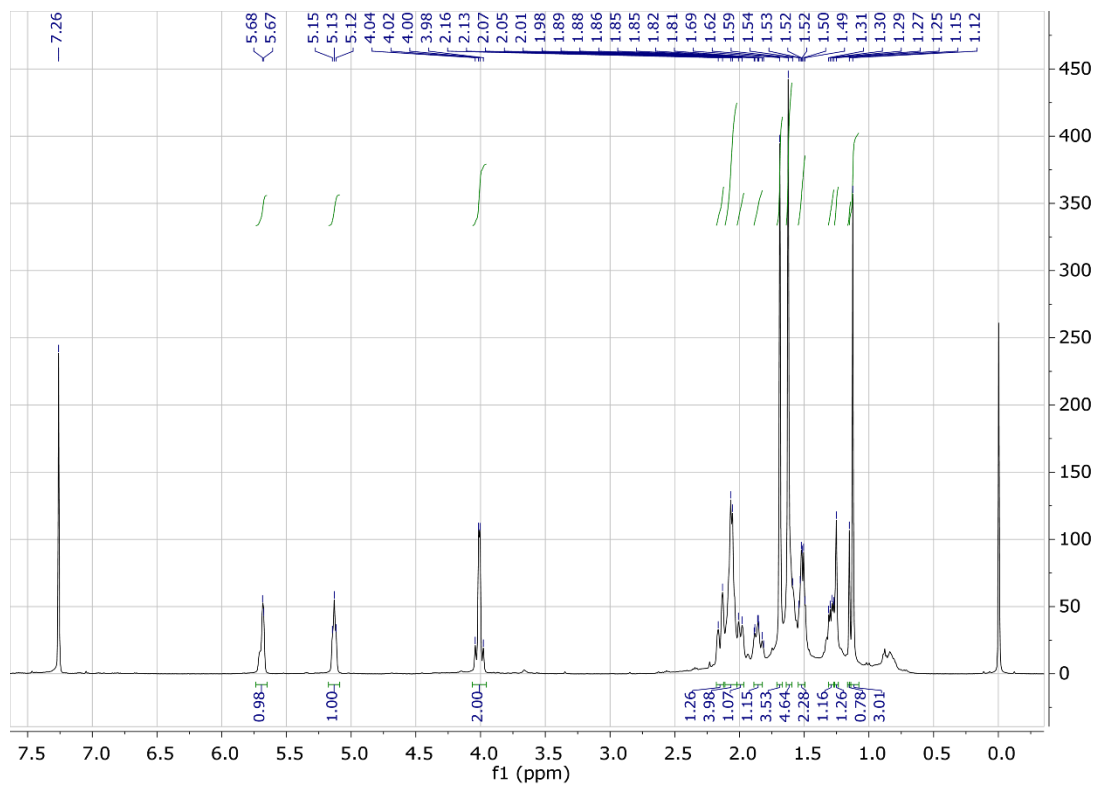

fig. S58.  $^1\text{H}$  NMR spectrum of compound 13 in  $\text{CDCl}_3$ .

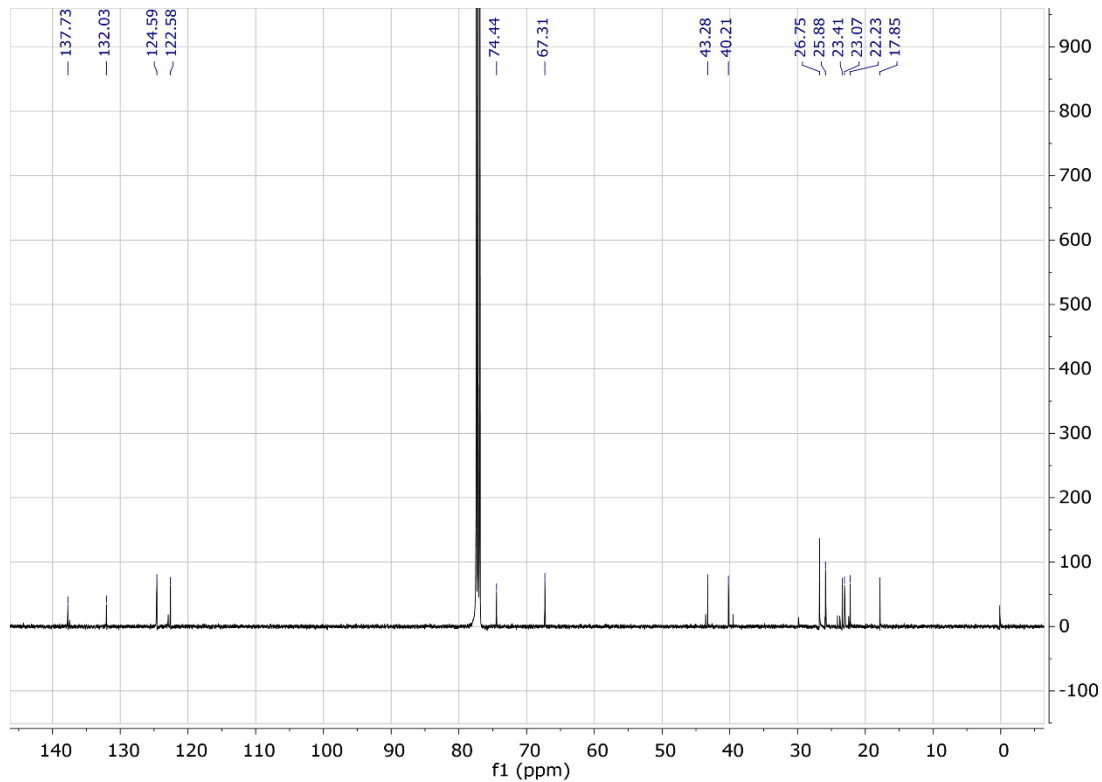

fig. S59.  $^{13}\text{C}$  NMR spectrum of compound 13 in  $\text{CDCl}_3$ .

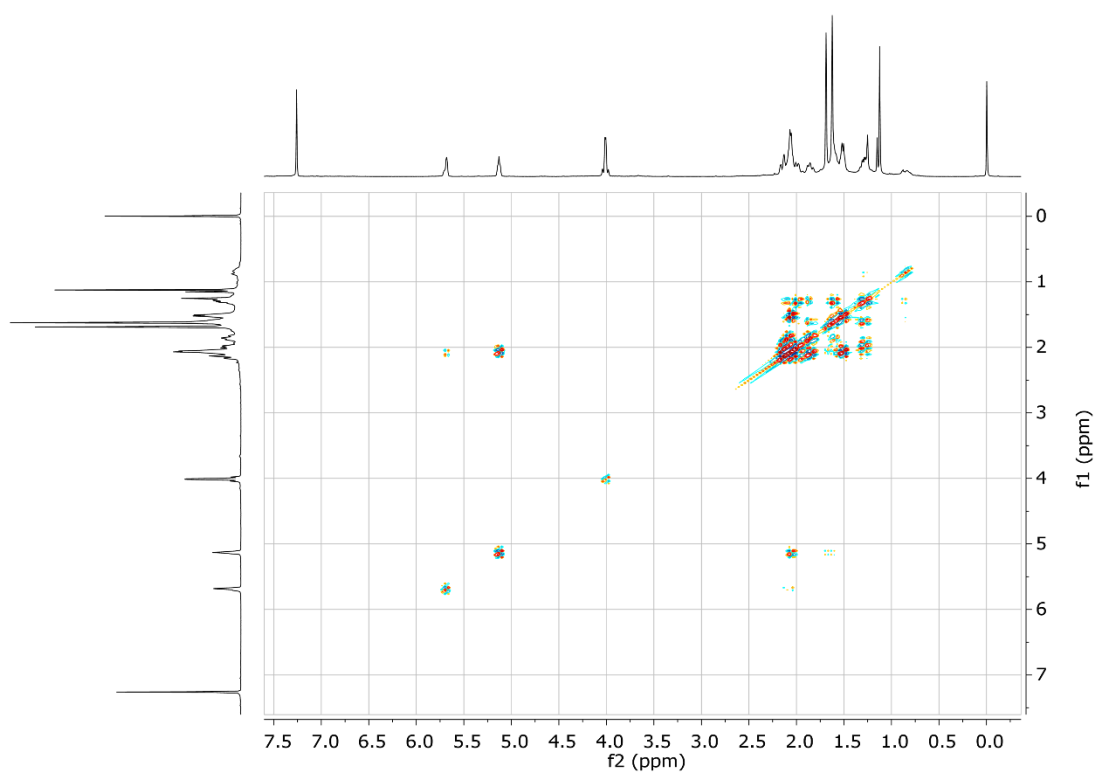

fig. S60.  $^1\text{H}$ - $^1\text{H}$  COSY spectrum of compound 13 in  $\text{CDCl}_3$ .

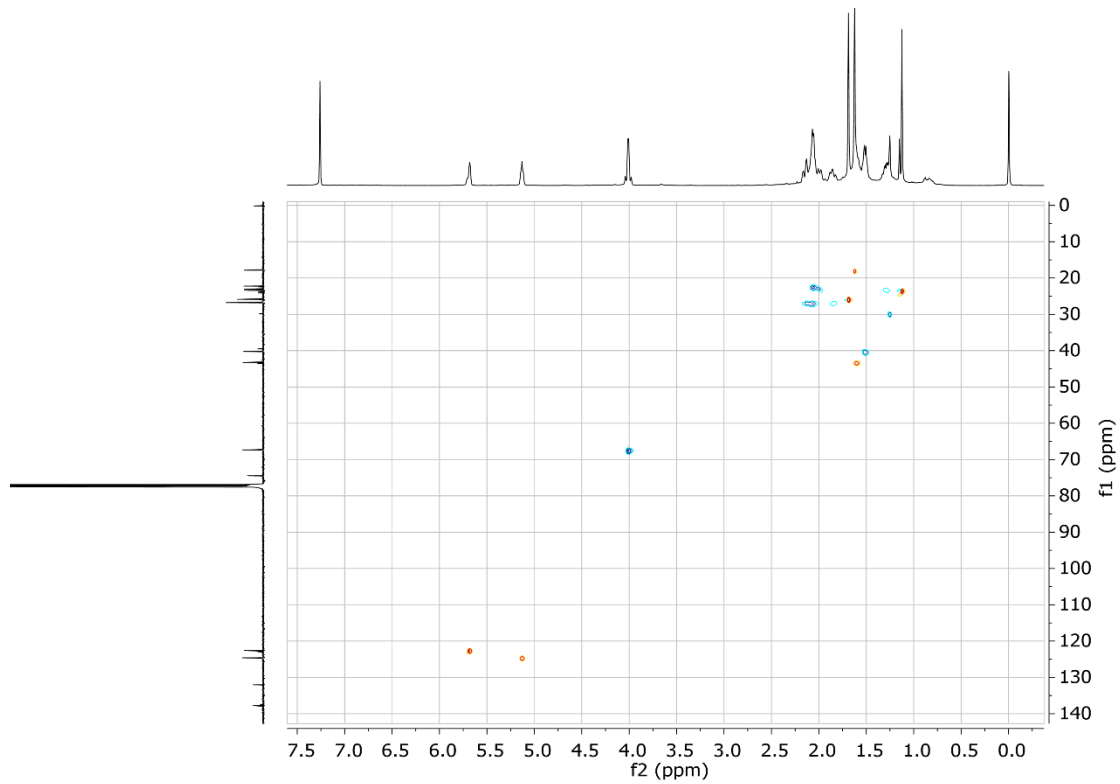

fig. S61. HSQC spectrum of compound 13 in  $\text{CDCl}_3$ .

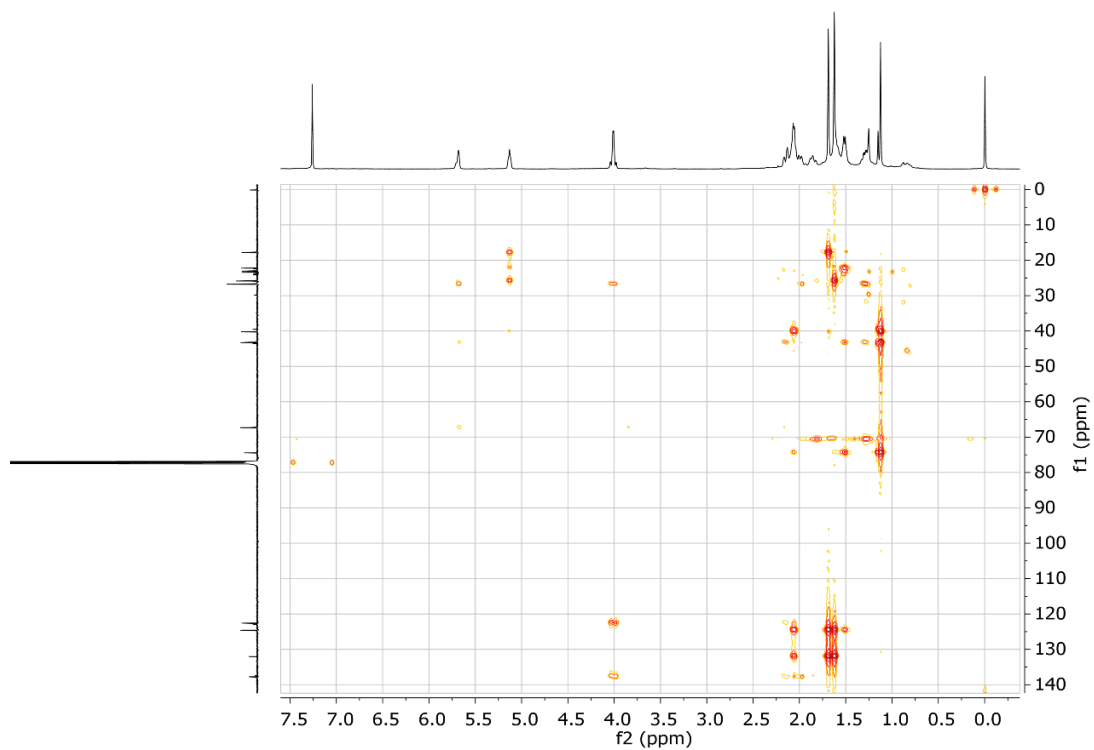

fig. S62. HMBC spectrum of compound 13 in  $\text{CDCl}_3$ .

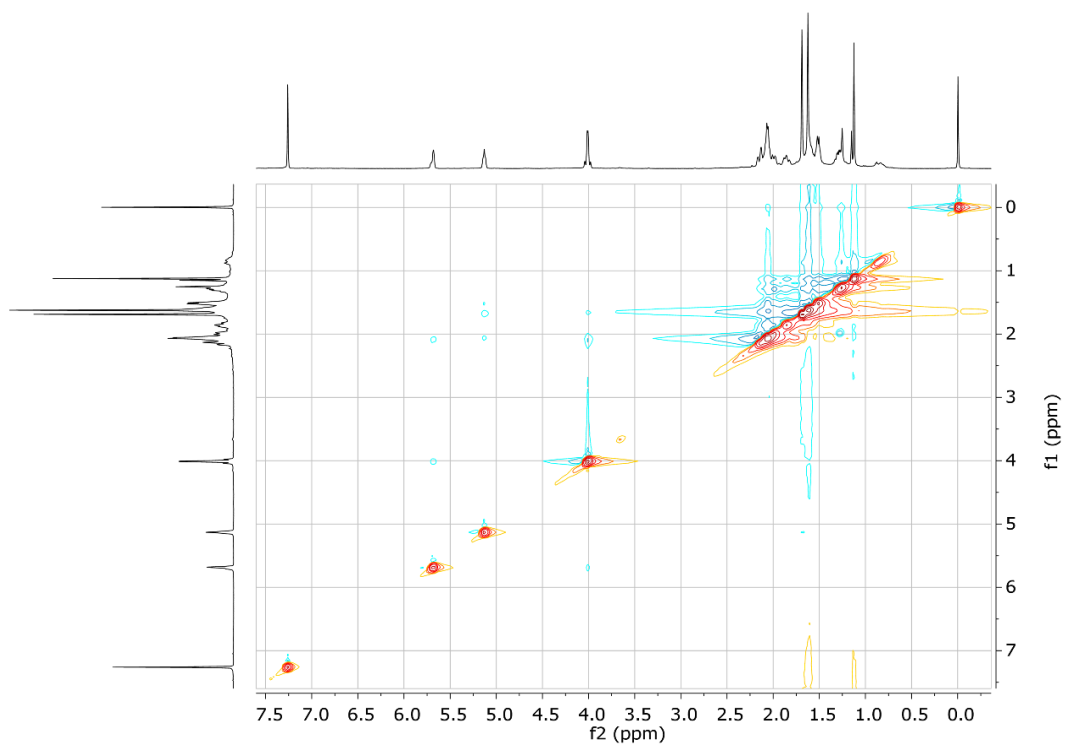

fig. S63. NOESY spectrum of compound 13 in  $\text{CDCl}_3$ .

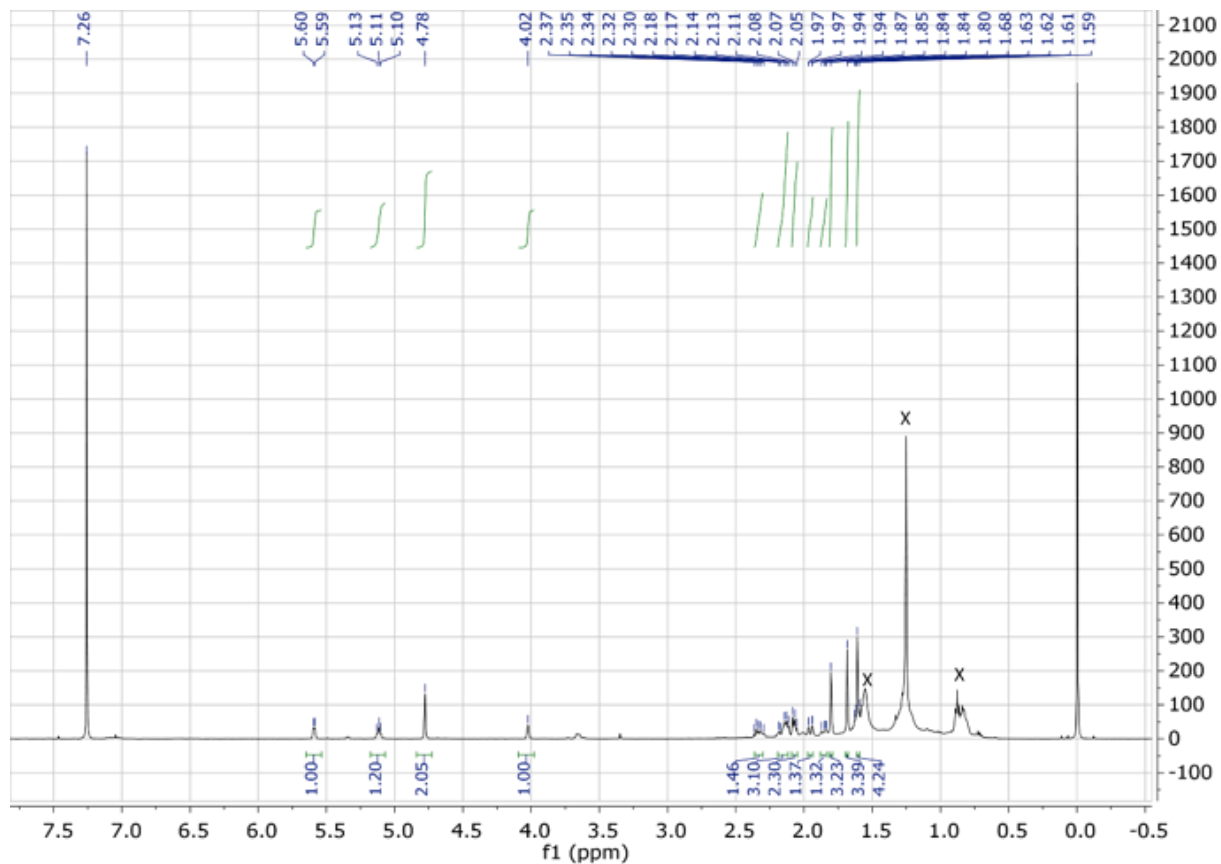

fig. S64.  $^1\text{H}$  NMR spectrum of compound 14 in  $\text{CDCl}_3$ .

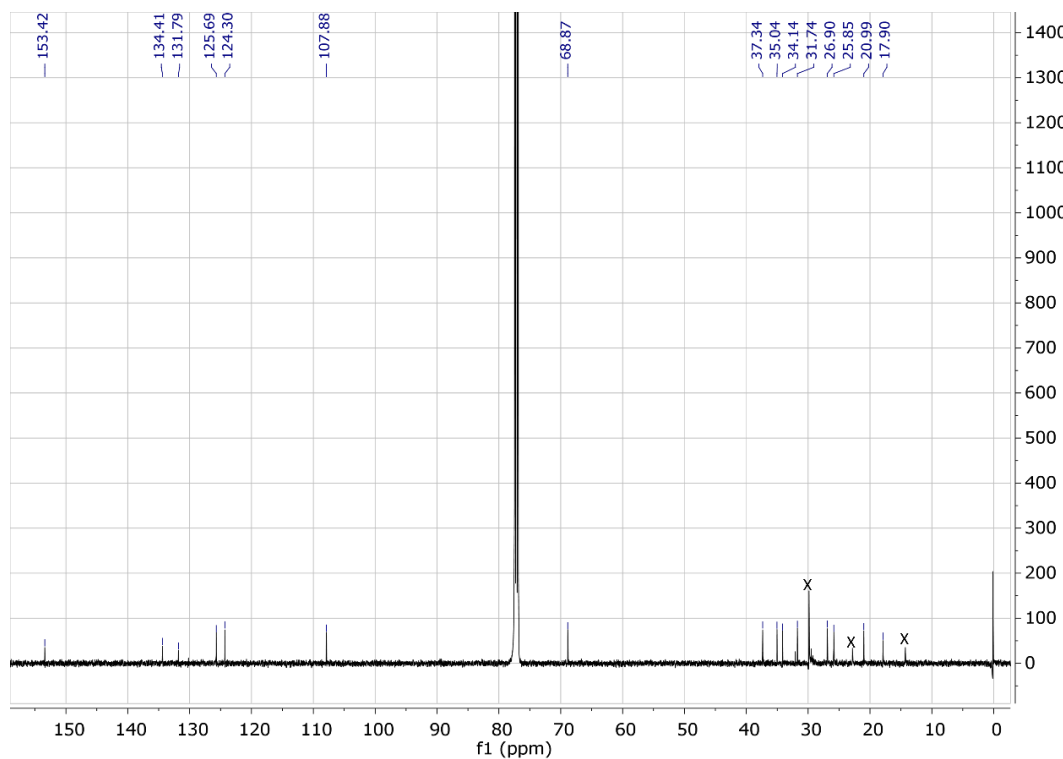

fig. S65.  $^{13}\text{C}$  NMR spectrum of compound 14 in  $\text{CDCl}_3$ .

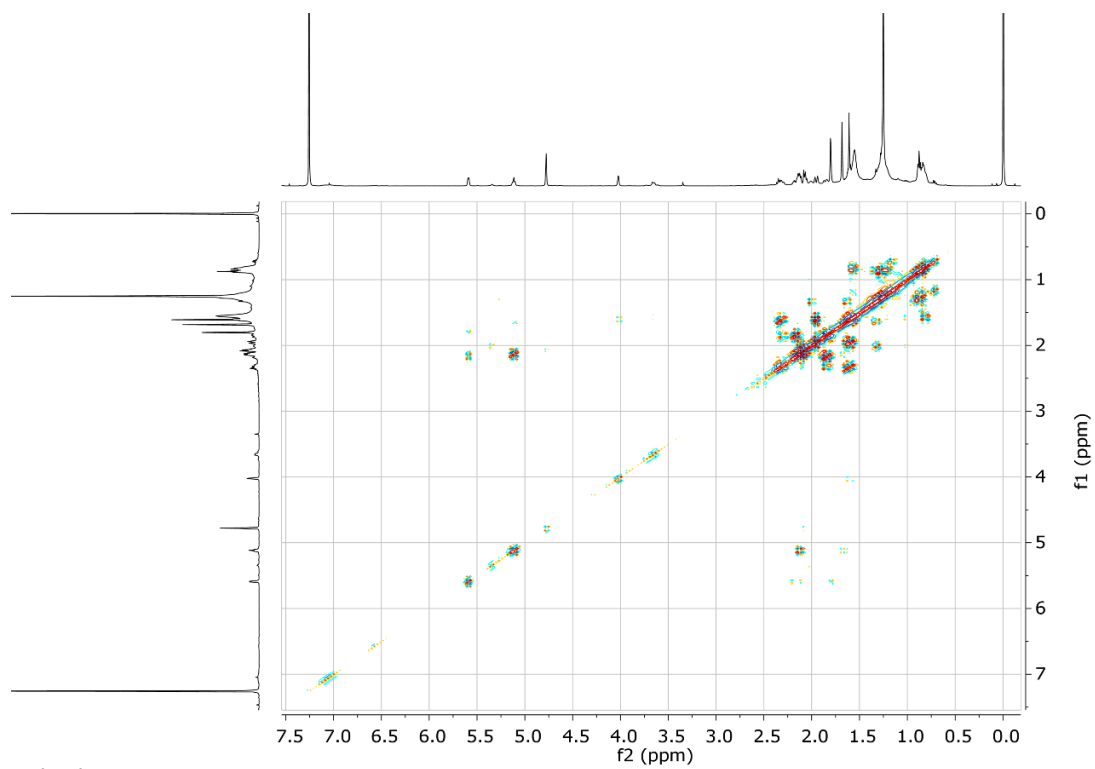

fig. S66.  $^1\text{H}$ - $^1\text{H}$  COSY spectrum of compound 14 in  $\text{CDCl}_3$ .

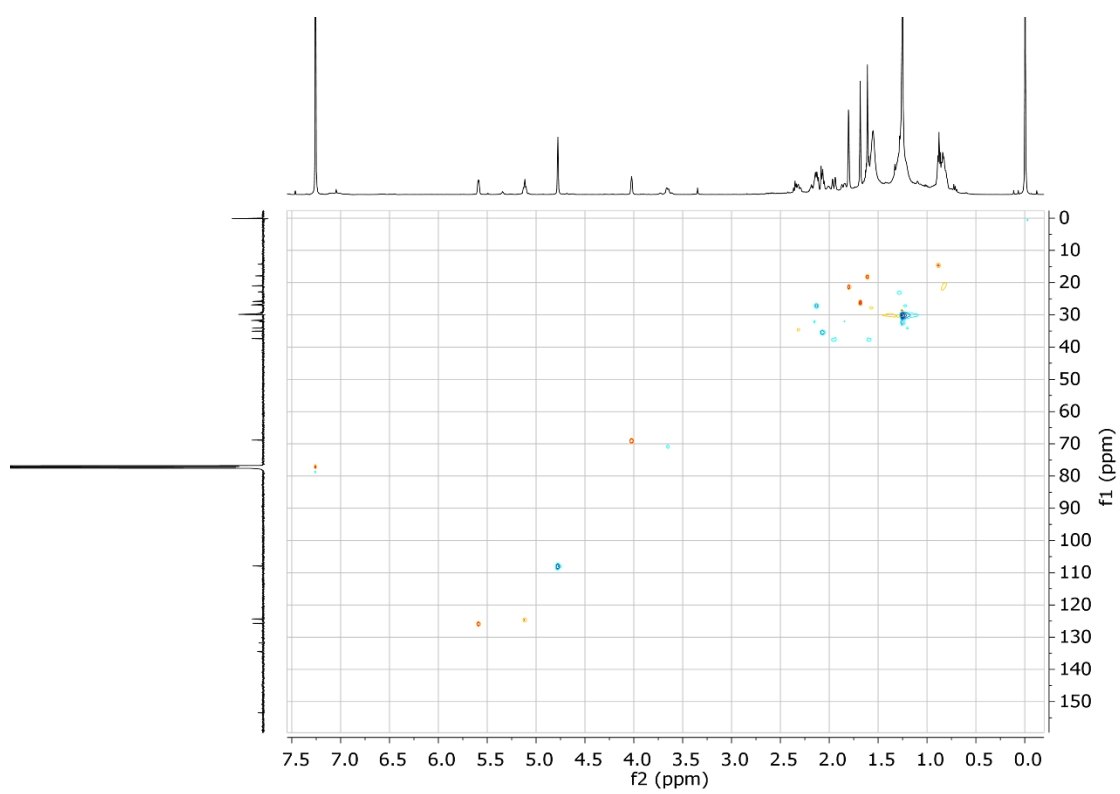

fig. S67. HSQC spectrum of compound 14 in  $\text{CDCl}_3$ .

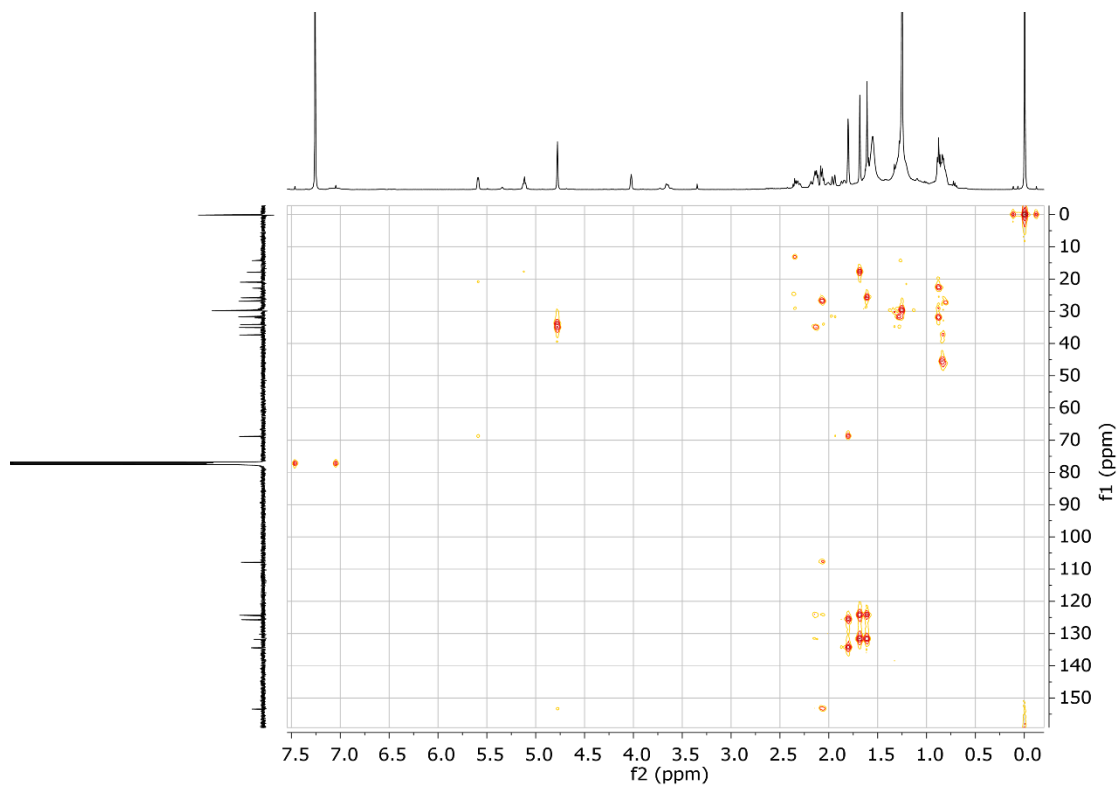

fig. S68. HMBC spectrum of compound 14 in  $\text{CDCl}_3$ .

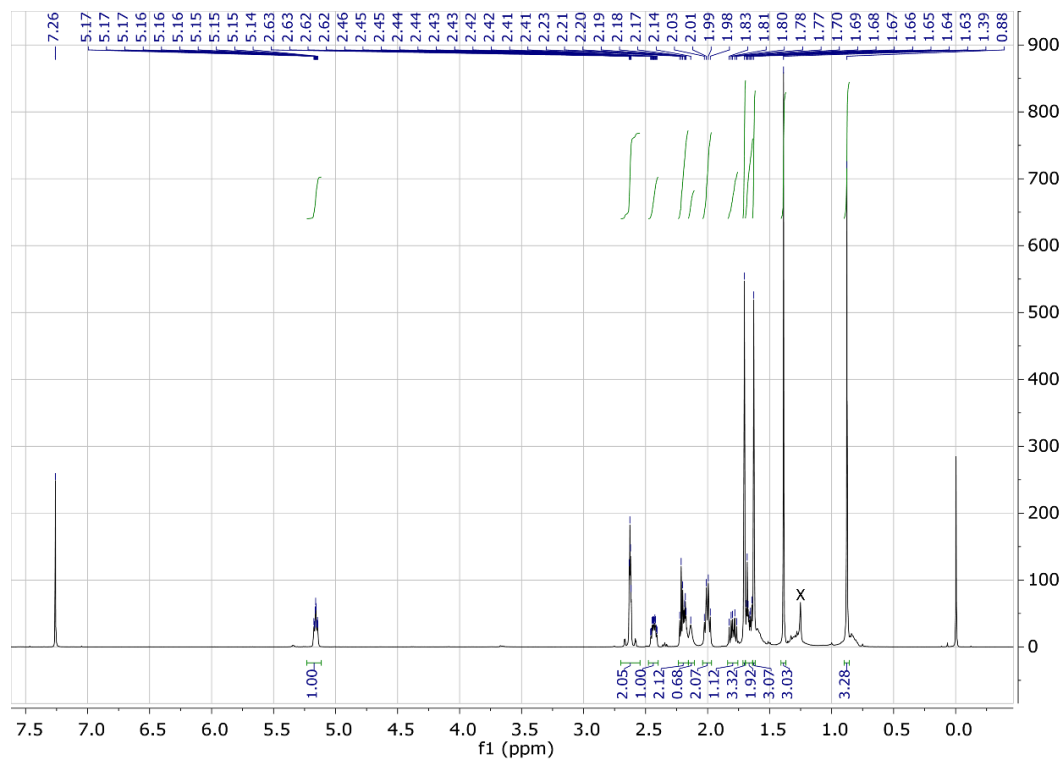

fig. S69.  $^1\text{H}$  NMR spectrum of compound 15 in  $\text{CDCl}_3$ .

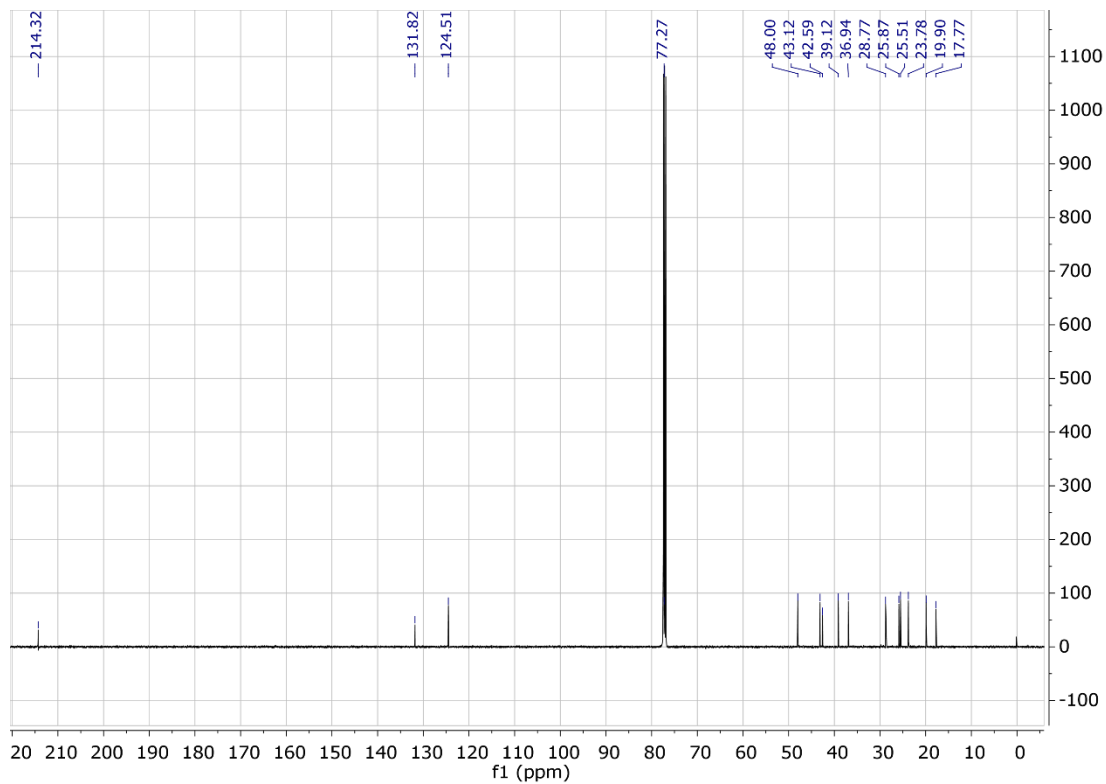

fig. S70. <sup>13</sup>C NMR spectrum of compound 15 in CDCl<sub>3</sub>.

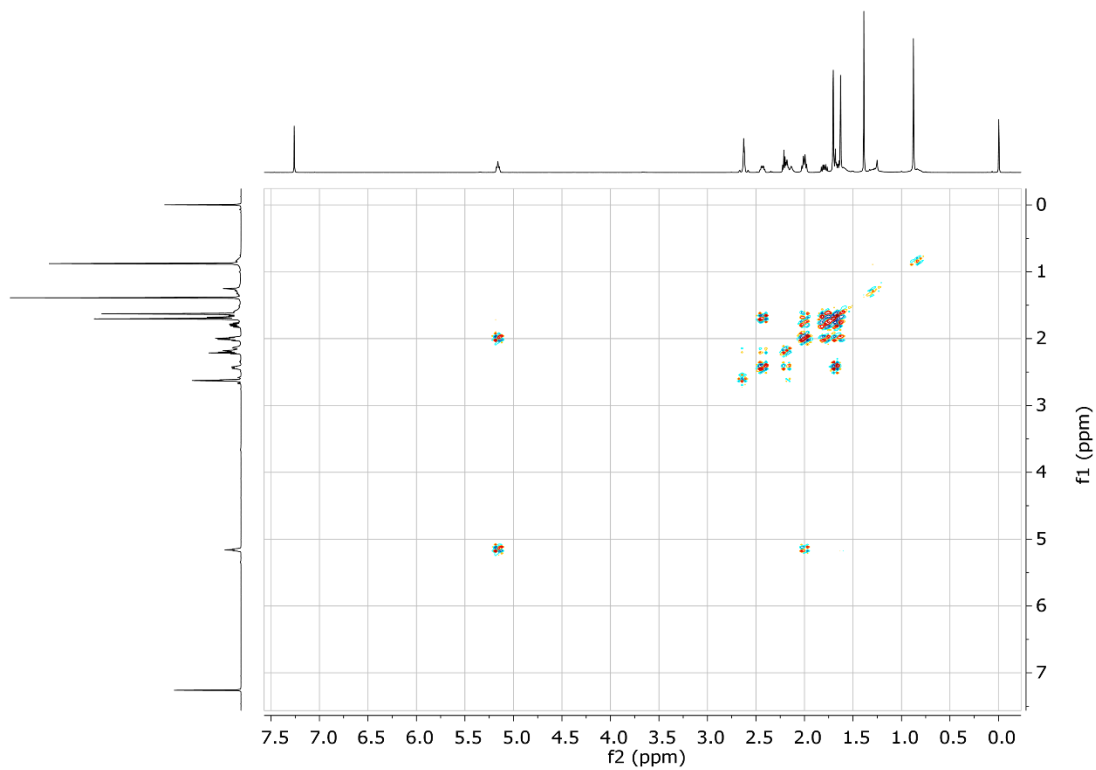

fig. S71. <sup>1</sup>H-<sup>1</sup>H COSY spectrum of compound 15 in CDCl<sub>3</sub>.



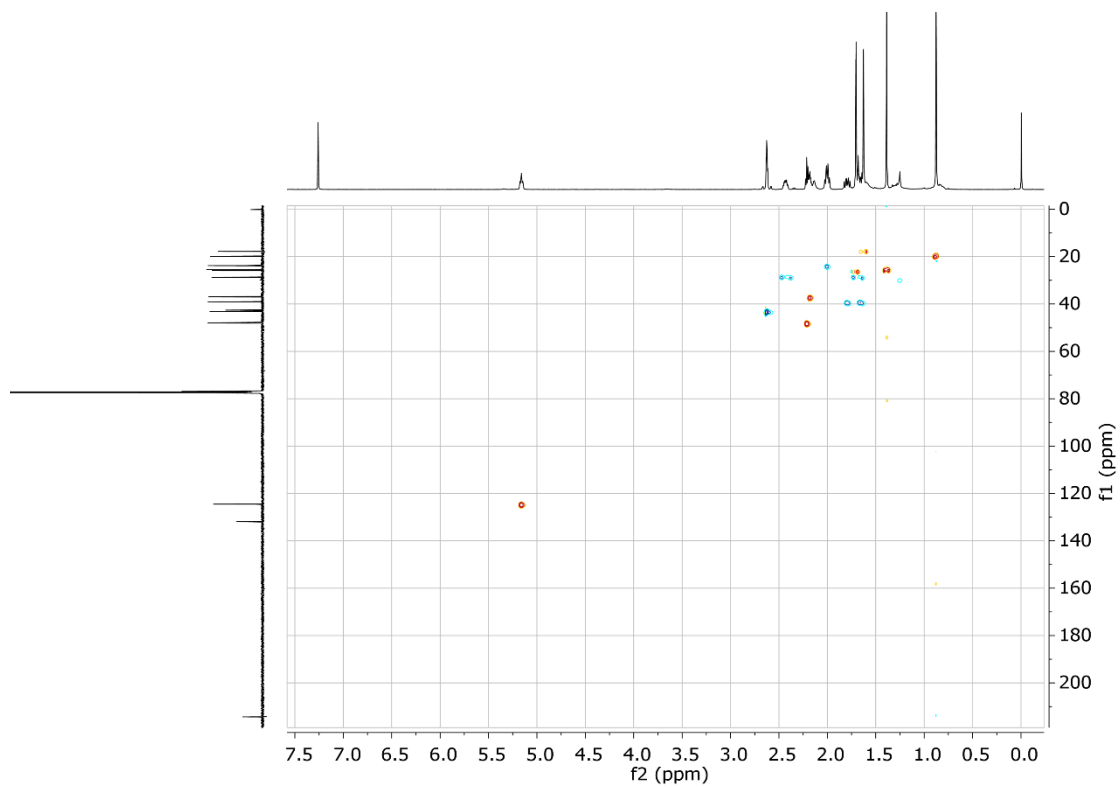

fig. S72. HSQC spectrum of compound 15 in CDCl<sub>3</sub>.

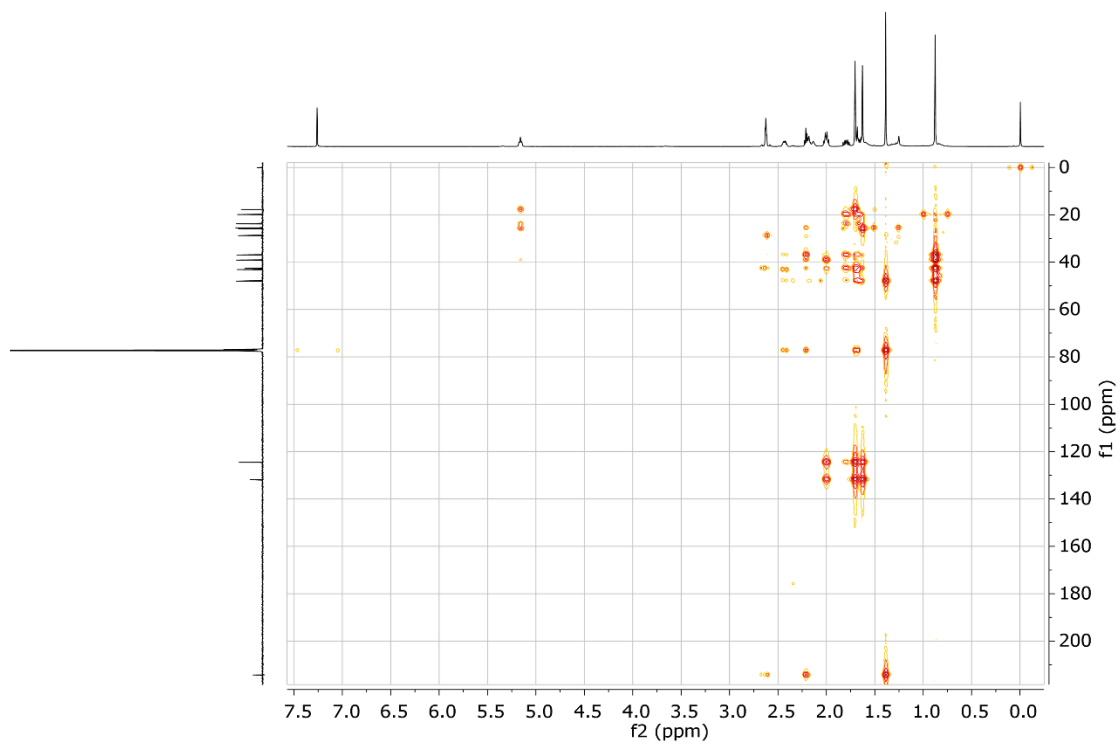

fig. S73. HMBC spectrum of compound 15 in CDCl<sub>3</sub>.

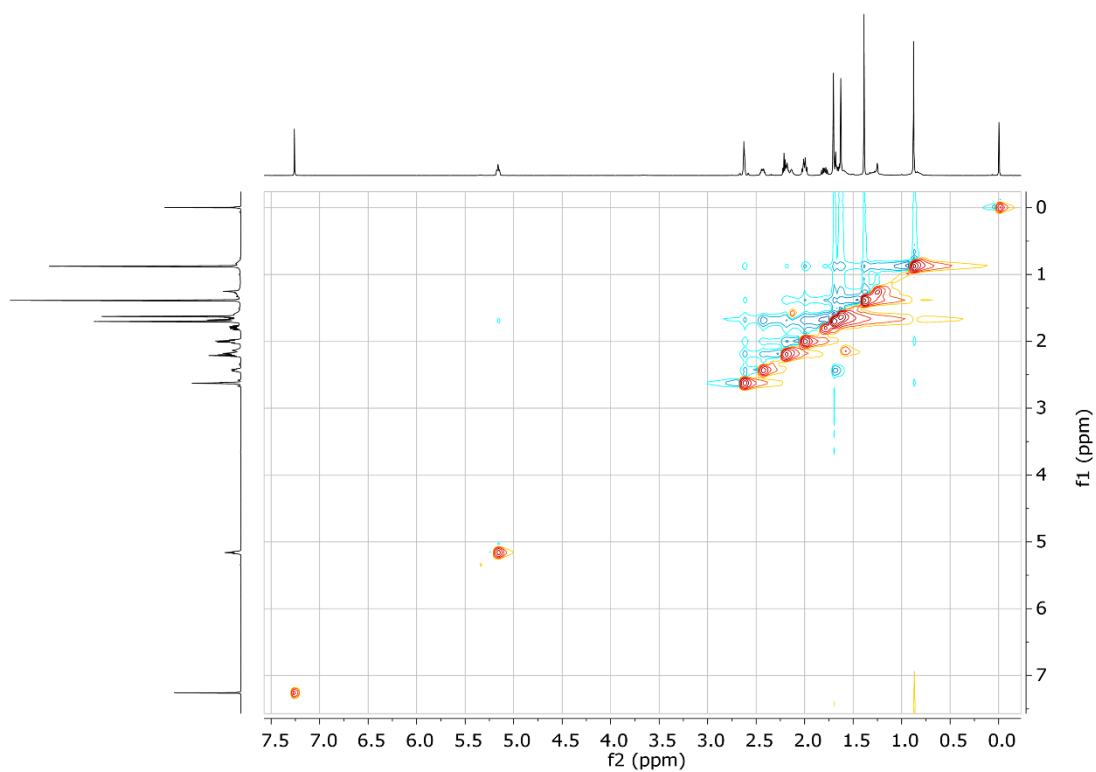

fig. S74. HMBC spectrum of compound 15 in  $\text{CDCl}_3$ .

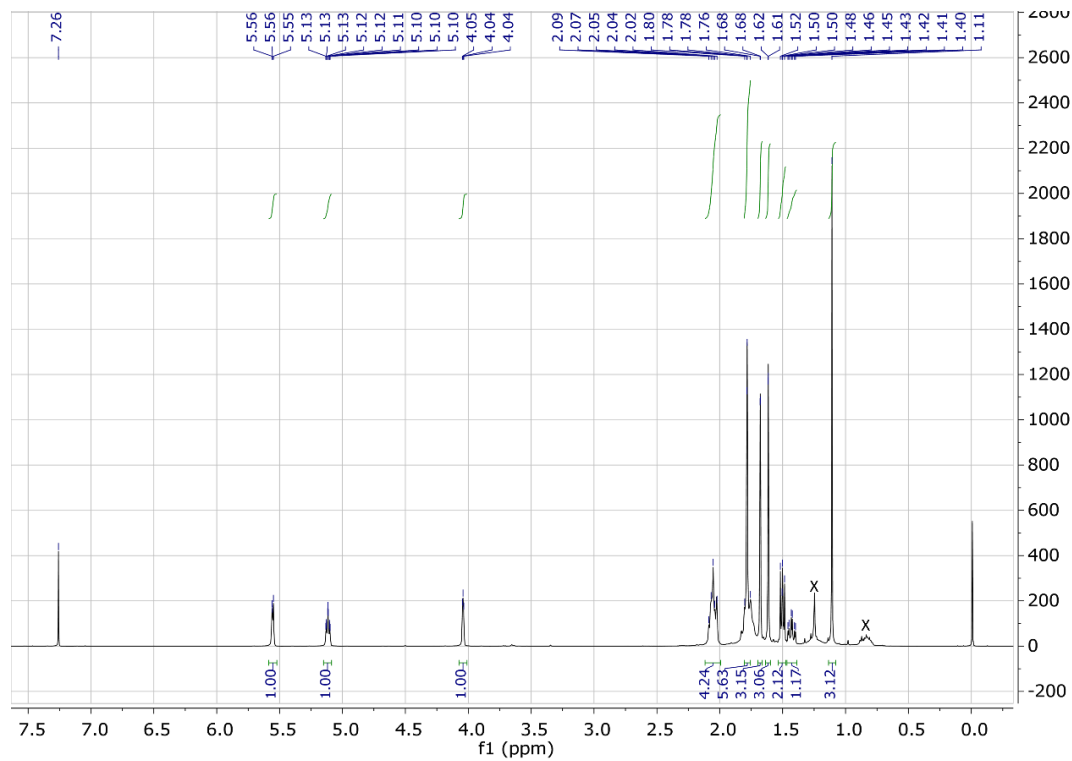

fig. S75.  $^1\text{H}$  NMR spectrum of compound 16 in  $\text{CDCl}_3$ .

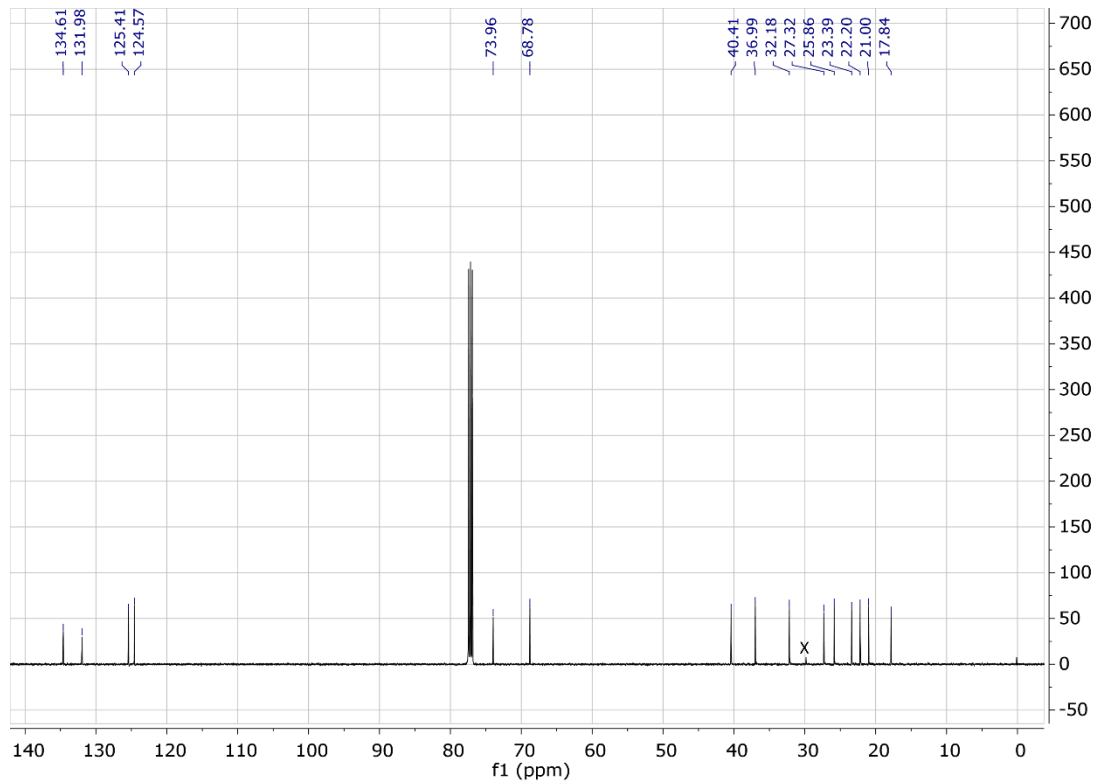

fig. S76.  $^{13}\text{C}$  NMR spectrum of compound 16 in  $\text{CDCl}_3$ .

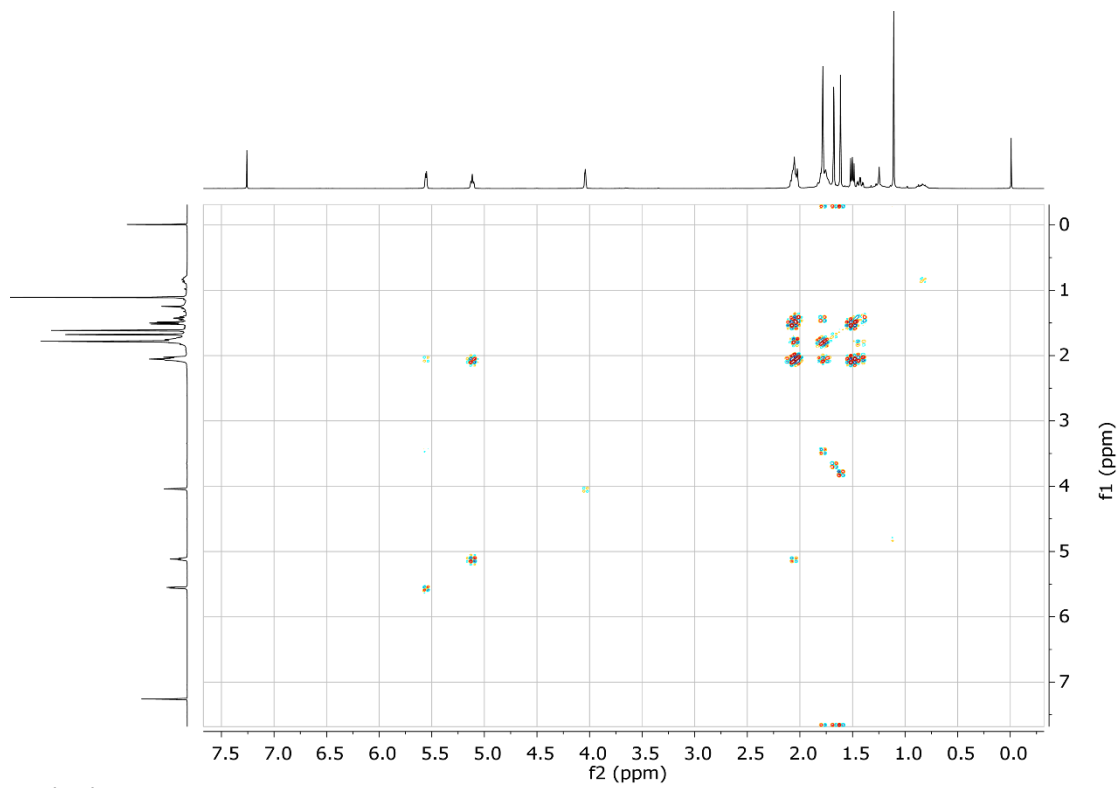

fig. S77.  $^1\text{H}$ - $^1\text{H}$  COSY spectrum of compound 16 in  $\text{CDCl}_3$ .

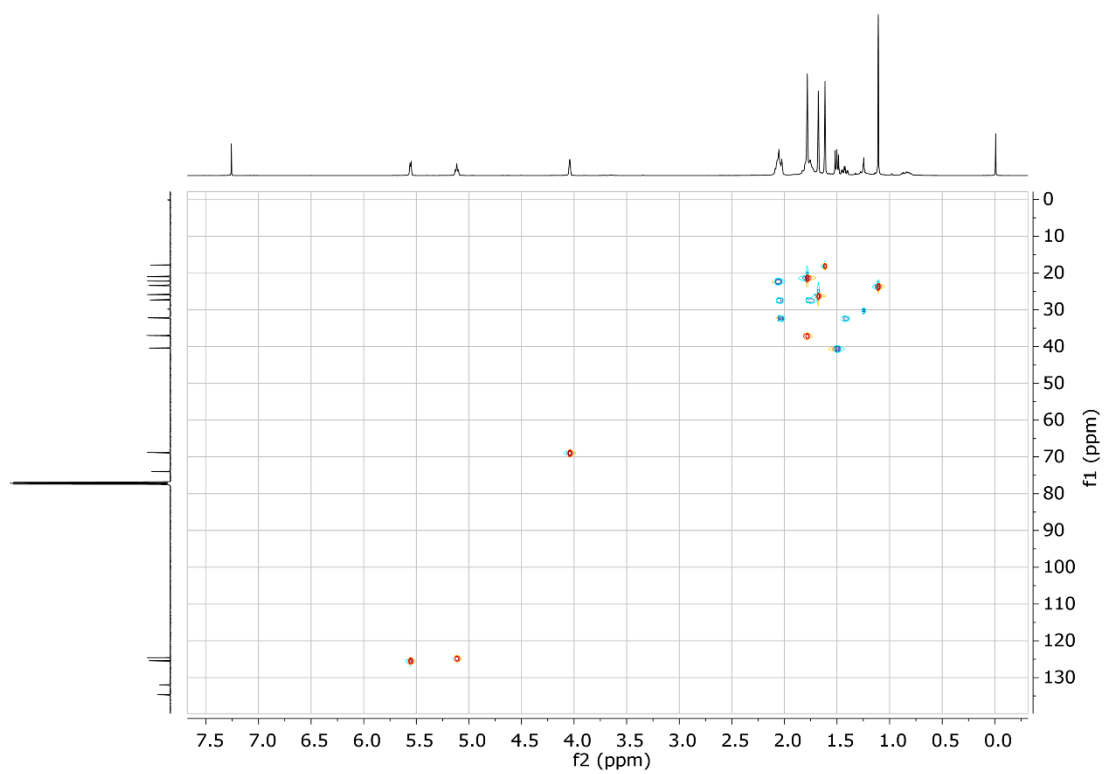

fig. S78. HSQC spectrum of compound 16 in CDCl<sub>3</sub>.

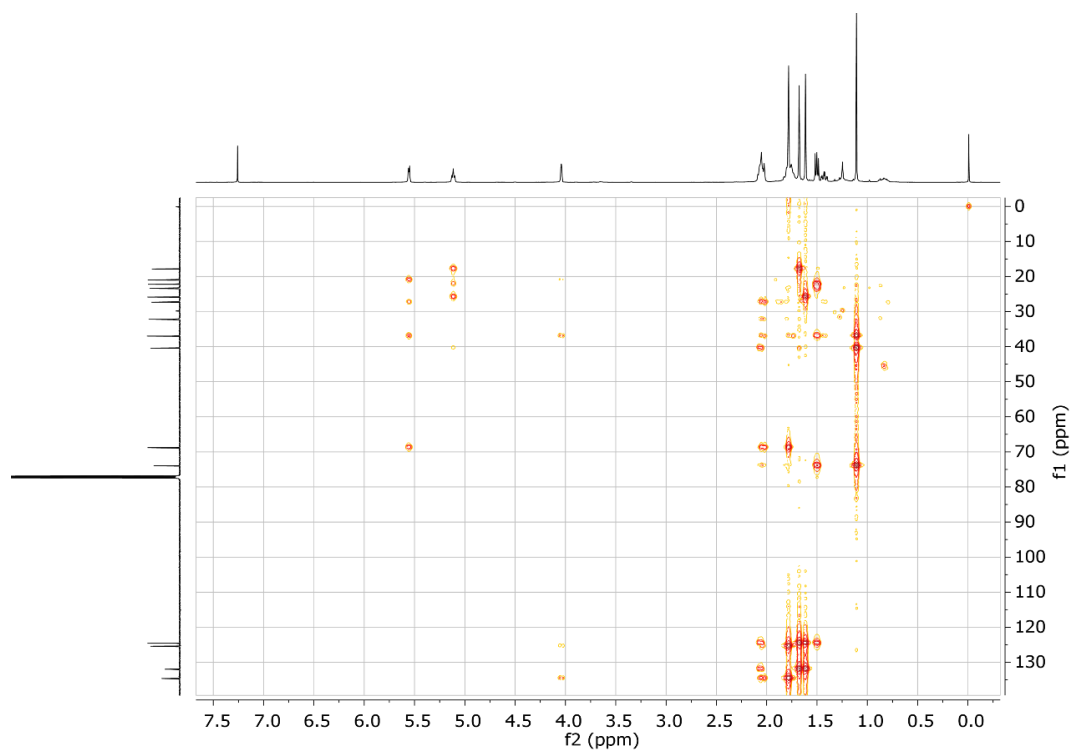

fig. S79. HMBC spectrum of compound 16 in CDCl<sub>3</sub>.
